# Supplementary material for: In Silico Screening and Validation of PDGFRA Inhibitors Enhancing Radioiodine Sensitivity in Thyroid Cancer
Source: Front Pharmacol. 2022 May 12;13:883581. doi: 10.3389/fphar.2022.883581 (PMC9133930; doi:10.3389/fphar.2022.883581)
Supplement: Supplementary file 2 [file Table1.XLSX]

## Sheet: Sheet1
LABLE	mol/CID	AM1_dipole	AM1_E	AM1_Eele	AM1_HF	AM1_HOMO	AM1_IP	AM1_LUMO	apol	ASA	ASA+	ASA-	ASA_H	ASA_P	ast_fraglike	ast_fraglike_ext	ast_violation	ast_violation_ext	a_acc	a_acid	a_aro	a_base	a_count	a_don	a_donacc	a_heavy	a_hyd	a_IC	a_ICM	a_nB	a_nBr	a_nC	a_nCl	a_nF	a_nH	a_nI	a_nN	a_nO	a_nP	a_nS	balabanJ	BCUT_PEOE_0	BCUT_PEOE_1	BCUT_PEOE_2	BCUT_PEOE_3	BCUT_SLOGP_0	BCUT_SLOGP_1	BCUT_SLOGP_2	BCUT_SLOGP_3
1	Fc1c(F)ccc(CNC(=O)c2cc(NC(=O)c3n4c(nc3)C=C(c3n(C)ncc3)C=C4)c(F)cc2)c1	3.8594	-159656	-1.22476e+06	13.2615	-8.99672	8.99672	-1.05845	68.3041	775.226	434.365	340.861	651.057	124.169	0	0	3	4	4	0	22	0	56	2	6	37	26	100.025	1.78616	0	0	26	0	3	19	0	6	2	0	0	1.08697	-2.3926	-0.629054	0.671649	2.35865	-2.47851	-0.502461	0.790116	2.42295
1	O(C)[C@@H]1[C@H](NC)C[C@H]2O[C@]1(C)n1c3c4n2c2c(c4c4C(=O)NCc4c3c3c1cccc3)cccc2	6.91622	-132021	-1.25656e+06	131.094	-7.90165	7.90165	-0.5101	73.4226	671.255	442.874	207.457	558.505	112.75	0	0	3	3	4	0	20	0	61	2	6	35	25	92.2027	1.51152	0	0	28	0	0	26	0	4	3	0	0	1.35351	-2.76478	-0.534021	0.590162	2.79154	-2.8508	-0.468547	0.684908	2.79056
1	Fc1c(NC(=O)c2n3c(nc2)C=C(c2n[nH]cc2)C=C3)cc(C(=O)NCc2c(N3CCN(C)CC3)cccc2)cc1	7.67761	-161807	-1.50532e+06	119.16	-8.62816	8.62816	-0.61916	83.098	786.623	467.334	319.289	588.643	197.98	0	0	4	6	6	0	22	0	70	4	10	41	28	114.962	1.64231	0	0	30	0	1	29	0	8	2	0	0	0.973405	-2.74874	-0.578518	0.6118	2.64375	-2.87028	-0.495461	0.727947	2.56285
1	Fc1c(NC(=O)c2n3c(nc2)C=C(c2n(C)ncc2)C=C3)cc(C(=O)NCc2c(N3CCN(C)CC3)cccc2)cc1	4.68181	-165383	-1.58094e+06	129.69	-8.82263	8.82263	-0.92651	86.1916	803.408	520.393	283.014	688.086	115.321	0	0	3	4	5	0	22	0	73	2	7	42	29	118.697	1.62599	0	0	31	0	1	31	0	8	2	0	0	0.974594	-2.74874	-0.56618	0.611799	2.64375	-2.87028	-0.479834	0.727944	2.56285
1	Fc1c(NC(=O)c2n3c(nc2)C=C(c2cn(C)nc2)C=C3)cc(C(=O)NCCN2C(C)(C)CCC2)cc1	6.42226	-148523	-1.23479e+06	65.7698	-8.6284	8.6284	-0.82854	77.3848	834.005	553.481	280.525	665.41	168.595	0	0	3	4	5	0	16	0	67	2	7	37	25	109.188	1.62967	0	0	27	0	1	30	0	7	2	0	0	1.07489	-2.70081	-0.527539	0.571854	2.7706	-2.79149	-0.458486	0.593573	2.78896
1	O=C(Nc1c(C)ncc(C(=O)NCCN2C(C)(C)CCC2)c1)c1c2n(nc1)C=C(c1cn(C)nc1)C=C2	8.83366	-142729	-1.2265e+06	153.031	-8.74713	8.74713	-0.81422	79.2614	854.636	593.824	260.812	685.118	169.517	0	0	3	5	6	0	16	0	69	2	8	37	25	107.106	1.55226	0	0	27	0	0	32	0	8	2	0	0	1.0749	-2.70077	-0.502097	0.516568	2.77061	-2.79151	-0.471202	0.542407	2.78896
1	O(C)c1cc(O)c2C(=O)O[C@@H](C)CCCC(=O)C(=O)C(=O)CCCc2c1	5.27792	-114809	-859457	-254.363	-9.44041	9.44041	-0.64606	53.7234	564.945	358.599	206.346	379.135	185.81	0	0	2	4	6	0	6	0	48	1	7	26	15	69.6086	1.45018	0	0	19	0	0	22	0	0	7	0	0	2.11484	-2.61899	-0.54724	0.443956	2.62929	-2.58947	-0.489968	0.440689	2.68332
1	Fc1c(NC(=O)c2n3c(nc2)C=C(c2cn(C)nc2)C=C3)cc(C(=O)NCc2c(N3CCN(C)CC3)cccc2)cc1	7.59339	-165394	-1.52975e+06	118.341	-8.64664	8.64664	-0.85112	86.1916	882.942	591.484	291.458	739.234	143.708	0	0	3	4	5	0	22	0	73	2	7	42	29	118.697	1.62599	0	0	31	0	1	31	0	8	2	0	0	0.970559	-2.74874	-0.566178	0.583159	2.64375	-2.87028	-0.458818	0.662652	2.56285
1	Fc1c(NC(=O)c2n3c(nc2)C=C(c2n(C)ncc2)C=C3)cc(C(=O)NCC2OC(C)(C)CC2)cc1	2.81592	-147241	-1.23089e+06	14.7191	-8.91086	8.91086	-0.97948	73.3264	774.232	505.612	268.62	624.406	149.827	0	0	3	4	5	0	16	0	63	2	7	36	24	105.711	1.67795	0	0	26	0	1	27	0	6	3	0	0	1.09391	-2.59472	-0.547294	0.594506	2.76279	-2.7026	-0.465886	0.649215	2.77961
1	ClCC(=O)Nc1c(C(F)(F)F)cc(NC(=O)c2cc(Nc3nc(-c4cnccc4)ccn3)c(C)cc2)cc1	6.50058	-168681	-1.38111e+06	-58.84	-8.68666	8.68666	-0.84017	71.1509	719.216	365.366	351.605	457.121	262.095	0	0	3	5	5	0	24	0	58	3	8	38	27	108.848	1.87669	0	0	26	1	3	20	0	6	2	0	0	1.28209	-2.34931	-0.580932	0.641392	2.40464	-2.40845	-0.539861	0.669839	2.51189
1	Fc1c(NC(=O)c2n3c(nc2)C=C(c2cnccc2)C=C3)cc(C(=O)NCc2c(N3CCN(C)CC3)cccc2)cc1	5.75748	-163286	-1.54722e+06	88.6951	-8.83487	8.83487	-0.93662	86.1848	810.152	499.771	310.381	694.027	116.125	0	0	3	4	5	0	23	0	72	2	7	42	30	115.376	1.60245	0	0	32	0	1	30	0	7	2	0	0	0.96992	-2.74874	-0.58043	0.621871	2.64375	-2.87028	-0.490488	0.736494	2.56285
1	O=C(Nc1c(C)ncc(C(=O)NCc2c(N3CCN(C)CC3)cccc2)c1)c1c2n(nc1)C=C(c1n(C)ncc1)C=C2	1.25837	-159593	-1.53515e+06	189.086	-8.96976	8.96976	-0.93818	88.0682	833.885	573.227	260.658	710.6	123.284	0	0	3	5	6	0	22	0	75	2	8	42	29	116.587	1.55449	0	0	31	0	0	33	0	9	2	0	0	0.974601	-2.74874	-0.547583	0.584805	2.64376	-2.87028	-0.482575	0.671944	2.56283
1	O=C(Nc1cc2NC(=O)/C(=C\c3c(C)c(C(=O)O)c[nH]3)/c2cc1)Nc1ccc(OC)cc1	6.03507	-130248	-942714	-71.8572	-8.28465	8.28465	-1.08301	62.2259	718.478	424.958	293.52	462.106	256.372	0	0	4	6	5	0	17	0	52	6	11	32	20	86.3327	1.66024	0	0	23	0	0	20	0	4	5	0	0	1.23036	-2.32541	-0.598809	0.705892	2.37582	-2.40402	-0.527235	0.762008	2.48428
1	O=C(Nc1cc2NC(=O)/C(=C\c3c(C)c(C(=O)O)c(C)[nH]3)/c2cc1)CC(=O)Nc1ccc(OC)cc1	5.25869	-147783	-1151699	-126.829	-8.24501	8.24501	-1.05681	70.975	799.246	478.459	320.787	560.116	239.13	0	0	4	6	6	0	17	0	60	6	12	36	22	98.6531	1.64422	0	0	26	0	0	24	0	4	6	0	0	1.20657	-2.35315	-0.57343	0.520349	2.41969	-2.46953	-0.518752	0.58729	2.4928
1	Brc1c(N[C@H]2[C@@H](C(=O)N)[C@@H]3C=C[C@H]2C3)nc(Nc2cn(C)nc2)nc1	5.17665	-101800	-742850	144.432	-8.59631	8.59631	-0.53103	51.7143	575.523	375.416	200.107	366.877	208.646	0	0	2	4	4	0	11	0	43	3	7	25	14	74.6192	1.73533	0	1	16	0	0	18	0	7	1	0	0	1.35764	-2.59804	-0.544861	0.563732	2.83973	-2.72815	-0.481436	0.629763	2.8467
1	O=C(OC(C)(C)C)Nc1c(OC)cc(-c2nn(CCN3CCC(N(C)C)CC3)c3ncnc(N)c23)cc1	3.11904	-149124	-1.33194e+06	15.8692	-8.58819	8.58819	-0.38041	82.3041	875.744	716.64	154.942	658.153	217.591	0	0	3	5	7	0	15	0	75	2	9	37	22	116.774	1.55698	0	0	26	0	0	38	0	8	3	0	0	1.34218	-2.81854	-0.330981	0.307293	2.73261	-2.86746	-0.230623	0.383134	2.70862
1	N(CC1CCN(CCn2nc(-c3cnc4[nH]ccc4c3)c3c(N)ncnc23)CC1)(C)C	4.45271	-117035	-972167	176.111	-8.68238	8.68238	-0.28605	67.957	725.793	587.753	127.921	527.48	198.313	0	0	2	3	7	0	18	0	60	3	10	31	18	86.8952	1.44825	0	0	22	0	0	29	0	9	0	0	0	1.17058	-2.82558	-0.569842	0.562667	2.74539	-2.84872	-0.497249	0.630959	2.75616
1	O(C(OCC)Cn1nc(-c2cnc3[nH]ccc3c2)c2c(N)ncnc12)CC	6.15007	-107925	-829930	78.0129	-8.70762	8.70762	-0.31824	54.9867	634.08	454.91	170.822	386.516	247.564	0	0	2	3	7	0	18	0	48	3	10	27	13	79.1294	1.64853	0	0	18	0	0	21	0	7	2	0	0	1.46492	-2.54841	-0.584192	0.600842	2.53943	-2.57891	-0.514459	0.663197	2.51997
1	N(CCC1CCN(CCn2nc(-c3ccc(C)cc3)c3c(N)ncnc23)CC1)(C)C	3.28982	-111749	-935687	118.141	-8.73678	8.73678	-0.27499	70.1842	741.744	602.477	134.648	616.149	125.596	0	0	3	4	5	0	15	0	63	1	6	30	20	86.4102	1.37159	0	0	23	0	0	33	0	7	0	0	0	1.27807	-2.82979	-0.373279	0.400743	2.7509	-2.83133	-0.310162	0.425227	2.79199
1	N(CC1CCN(CCn2nc(-c3ccc(C)cc3)c3c(N)ncnc23)CC1)(C)C	3.04264	-108155	-894612	124.737	-8.70366	8.70366	-0.24144	67.0906	713.235	576.089	132.818	587.623	125.611	0	0	2	3	5	0	15	0	60	1	6	29	19	83.0744	1.38457	0	0	22	0	0	31	0	7	0	0	0	1.30766	-2.82558	-0.379937	0.407178	2.74539	-2.84872	-0.320123	0.428593	2.75616
1	N(C)(C)C1CCN(CCn2nc(-c3ccc(C)cc3)c3c(N)ncnc23)CC1	3.62905	-104559	-851078	133.784	-8.74389	8.74389	-0.27588	63.997	684.463	546.987	132.45	558.396	126.067	0	0	2	3	5	0	15	0	57	1	6	28	18	79.7031	1.3983	0	0	21	0	0	29	0	7	0	0	0	1.33707	-2.81854	-0.399903	0.434877	2.73261	-2.86746	-0.330006	0.459324	2.70861
1	O=C(Nc1cc2NC(=O)/C(=C\c3c(C)c(C(=O)NCCN4CCCC4)c(C)[nH]3)/c2cc1)CC(=O)Nc1ccc(OC)cc1	4.05197	-171460	-1.49825e+06	-71.5738	-8.24697	8.24697	-1.13415	90.9345	969.425	647.032	322.393	775.631	193.794	0	0	4	6	6	0	17	0	79	5	11	43	28	124.762	1.57927	0	0	32	0	0	36	0	6	5	0	0	1.03256	-2.60877	-0.552027	0.517143	2.69296	-2.75828	-0.509095	0.581476	2.69938
1	O=[N+]([O-])c1c(-c2c(C=C3C(=O)Nc4c3cccc4)c[nH]n2)cccc1	5.024	-98053	-674024	121.032	-8.64495	8.64495	-1.01193	46.4875	548.213	263.961	284.252	338.344	209.869	0	0	2	2	3	0	17	0	37	3	6	25	18	61.9167	1.67342	0	0	18	0	0	12	0	4	3	0	0	1.4471	-2.1829	-0.623469	0.75835	2.35592	-2.20713	-0.545727	0.825406	2.46919
1	Fc1c(NC(=O)c2c3n(nc2)C=C(c2n(C)ncc2)C=C3)cc(C(=O)NCc2c(N3CCN(C)CC3)cccc2)cc1	4.64006	-165375	-1591665	137.173	-8.76592	8.76592	-0.96775	86.1916	791.91	517.029	274.881	674.675	117.235	0	0	3	4	5	0	22	0	73	2	7	42	30	118.697	1.62599	0	0	31	0	1	31	0	8	2	0	0	0.974601	-2.74874	-0.566789	0.611799	2.64375	-2.87028	-0.48152	0.727946	2.56285
1	Fc1c(NC(=O)c2n3c(nc2)C=C(c2n(C)ncc2)C=C3)cc(C(=O)NCCN2C(C)(C)CCC2)cc1	2.96656	-148520	-1.24462e+06	68.8928	-8.96518	8.96518	-1.03716	77.3848	832.701	553.821	278.88	678.588	154.112	0	0	3	4	5	0	16	0	67	2	7	37	25	109.188	1.62967	0	0	27	0	1	30	0	7	2	0	0	1.08046	-2.70081	-0.538321	0.572506	2.7706	-2.79149	-0.479833	0.59398	2.78896
1	Fc1c(NC(=O)c2n3c(nc2)C=C(c2n(C)ncc2)C=C3)cc(C(=O)NCCN2[C@@H](C)CCC[C@H]2C)cc1	2.34282	-152115	-1.31601e+06	61.0179	-8.9243	8.9243	-1.06014	80.4784	834.598	561.667	272.931	688.058	146.54	0	0	3	4	5	0	16	0	70	2	7	38	26	112.792	1.61132	0	0	28	0	1	32	0	7	2	0	0	1.07692	-2.83933	-0.554803	0.636446	2.75234	-2.87008	-0.479834	0.752727	2.7937
1	FC(F)(F)c1c(CN2CCN(CCO)CC2)ccc(NC(=O)c2cc(C#Cc3n(C)c(C(=O)NC)nc3)c(C)cc2)c1	6.63944	-183360	-1.5338e+06	-78.5081	-8.92377	8.92377	-1.00395	85.4812	920.2	622.67	297.53	682.655	237.545	0	0	3	4	6	0	17	0	75	3	9	42	30	128.47	1.71294	0	0	30	0	3	33	0	6	3	0	0	1.24956	-2.78216	-0.477805	0.477303	2.67955	-2.8902	-0.392369	0.543775	2.61515
1	FC(F)(F)c1c(NC(=O)/C=C/CN(C)C)ccc(C(=O)Nc2cc(Nc3nc(-c4cnccc4)ccn3)c(C)cc2)c1	3.8251	-179165	-1.54333e+06	-53.0948	-8.5328	8.5328	-0.67826	82.4452	886.061	551.332	329.312	658.194	227.867	0	0	3	5	6	0	24	0	70	3	9	42	30	120.831	1.72615	0	0	30	0	3	28	0	7	2	0	0	1.25675	-2.55348	-0.580926	0.639842	2.42725	-2.62932	-0.492267	0.670168	2.4975
1	Fc1c(NC(=O)c2n3c(nc2)C=C(c2n(C)ncc2)C=C3)cc(C(=O)NCCN(C(C)(C)C)CC)cc1	3.29319	-149149	-1.2481e+06	86.3421	-8.86164	8.86164	-0.89582	78.7184	836.2	543.772	292.428	648.086	188.114	0	0	3	4	5	0	16	0	69	2	7	37	25	111.455	1.61529	0	0	27	0	1	32	0	7	2	0	0	1.24256	-2.76398	-0.531143	0.548488	2.66785	-2.83221	-0.465641	0.583496	2.66658
1	Fc1c(F)cccc1NC(=O)Nc1ccc(Oc2c3c(ncc2)cc(OC)c(OC)c3)cc1	2.49044	-143070	-1020720	-64.2276	-8.69311	8.69311	-0.48125	62.5311	743.417	482.407	255.598	651.831	91.5858	0	0	3	4	4	0	22	0	52	2	6	33	25	90.9183	1.74843	0	0	24	0	2	19	0	3	4	0	0	1.20696	-2.31086	-0.638731	0.666788	2.27445	-2.40468	-0.53808	0.795302	2.47388
1	O=C(N(C)c1ccc(N/C(/c2ccccc2)=C/2\C(=O)Nc3c\2ccc(C(=O)OC)c3)cc1)CN1CCN(C)CC1	7.83843	-155367	-1.41249e+06	-9.5263	-8.21267	8.21267	-0.73769	85.2722	869.944	639.666	230.278	713.941	156.003	0	0	3	4	5	0	18	0	73	2	7	40	28	112.202	1.53702	0	0	31	0	0	33	0	5	4	0	0	1.16851	-2.76757	-0.575773	0.618456	2.66908	-2.89641	-0.483202	0.707852	2.54323
1	Fc1cc(C(c2[nH]c(C)cn2)=C2C(=O)Nc3c2cc(NC2CCN(CC)CC2)cc3)ccc1	4.91946	-128038	-1.11562e+06	53.7637	-8.079	8.079	-0.9721	71.2892	704.628	471.794	232.833	580.355	124.272	0	0	4	5	4	0	17	0	61	4	8	33	25	93.348	1.53029	0	0	26	0	1	28	0	5	1	0	0	1.29102	-2.7981	-0.541532	0.588832	2.71523	-2.84519	-0.488607	0.713962	2.69766
1	O=C(Nc1cc(Nc2nc(-c3cnccc3)ccn2)c(C)cc1)c1ccc(CN2CCN(C)CC2)cc1	3.65556	-136201	-1.22248e+06	126.704	-8.49352	8.49352	-0.53794	80.2126	819.55	602.107	212.621	716.614	102.936	0	0	3	4	6	0	24	0	68	2	8	37	27	99.8345	1.46815	0	0	29	0	0	31	0	7	1	0	0	1.03052	-2.77142	-0.616897	0.652747	2.65934	-2.87093	-0.522809	0.721733	2.59239
1	O=C(Nc1ccc(OC)cc1)Nc1ccc(Oc2c3c(ncc2)cc(OC)c(OC)c3)cc1	2.67983	-132303	-995465	-48.2995	-8.5249	8.5249	-0.50212	66.6462	777.375	559.327	212.358	678.292	99.0835	0	0	3	4	5	0	22	0	56	2	7	33	24	88.709	1.58409	0	0	25	0	0	23	0	3	5	0	0	1.17862	-2.32641	-0.624392	0.638115	2.27089	-2.40317	-0.53808	0.765095	2.47395
1	O=C(Nc1cc(OC)ccc1)Nc1ccc(Oc2c3c(ncc2)cc(OC)c(OC)c3)cc1	3.10643	-132303	-995619	-48.7016	-8.67943	8.67943	-0.49606	66.6462	775.365	559.111	211.035	677.699	97.6657	0	0	3	4	5	0	22	0	56	2	7	33	24	88.709	1.58409	0	0	25	0	0	23	0	3	5	0	0	1.19195	-2.32791	-0.624392	0.622381	2.27206	-2.40355	-0.556067	0.755036	2.47397
1	Clc1cc(Nc2nc(NC3CCC(N)CC3)nc3n(Cc4ccccc4)cnc23)ccc1	3.39178	-121093	-1.01656e+06	138.756	-8.2122	8.2122	-0.20856	69.4566	714.528	461.376	253.153	568.267	146.262	0	0	3	4	4	0	21	0	58	3	7	32	21	87.8609	1.51484	0	0	24	1	0	26	0	7	0	0	0	1.2416	-2.7981	-0.649092	0.687707	2.74562	-2.8347	-0.53808	0.805073	2.7876
1	Fc1c(-c2c3c(N)ncnc3n(C3CC(N4CCN(C(=O)C)CC4)C3)c2)cc(OC[C@H]2OCCC2)cc1	2.90044	-152135	-1.33193e+06	-14.314	-8.35939	8.35939	-0.31035	79.0872	830.261	542.09	194.27	659.158	171.102	0	0	3	4	6	0	15	0	70	1	7	37	24	113.938	1.62769	0	0	27	0	1	33	0	6	3	0	0	1.07121	-2.86913	-0.610356	0.631923	2.81217	-2.92637	-0.510097	0.701002	2.85692
1	FC(F)(F)CNc1nc(Nc2cc3NC(=O)COC(C)(C)c3cc2)nc2c1occ2	3.8973	-141364	-1.0233e+06	-140.23	-8.81194	8.81194	-0.56366	55.0193	623.375	326.608	296.767	334.087	289.288	0	0	3	4	4	0	15	0	48	3	7	30	17	91.1895	1.89978	0	0	19	0	3	18	0	5	3	0	0	1.36706	-2.55898	-0.582357	0.565055	2.58841	-2.53483	-0.54861	0.626023	2.70993
1	Oc1cc(-c2c(-c3ccncc3)nn3C(c4ccc(N5[C@@H]6CN(C)C(C5)C6)cc4)=CC=Nc23)ccc1	6.7918	-129767	-1.14578e+06	205.557	-8.36135	8.36135	-0.94355	75.7786	763.034	548.174	214.86	648.291	114.744	0	0	3	4	5	0	23	0	62	1	6	36	27	90.5575	1.4606	0	0	29	0	0	26	0	6	1	0	0	1.04535	-2.66145	-0.637064	0.696837	2.82928	-2.78714	-0.53808	0.793214	2.74639
1	O=C(N)c1c(N)c2c(CCC)cc(N3CCC(N)CC3)nc2s1	2.60769	-90303.2	-666626	-8.62596	-8.05472	8.05472	-0.65308	52.6982	575.586	409.089	161.41	326.896	248.69	0	0	1	3	3	0	9	0	46	3	6	23	15	74.4323	1.61809	0	0	16	0	0	23	0	5	1	0	1	1.71209	-2.75982	-0.54733	0.532223	2.69468	-2.86167	-0.405642	0.652728	2.66689
1	O=C(N)c1c(N)c2c(CCC)cc(N3CCC(O)CC3)nc2s1	2.44797	-92606.5	-669444	-58.5247	-8.0927	8.0927	-0.69985	51.7334	574.721	394.024	175.36	333.709	241.012	0	0	1	3	3	0	9	0	45	3	6	23	15	75.0259	1.66724	0	0	16	0	0	22	0	4	2	0	1	1.71209	-2.73631	-0.50915	0.552966	2.69478	-2.79387	-0.450293	0.563007	2.67148
1	O=C(N)c1c(N)c2c(CCC)cc(N3CC(O)CCC3)nc2s1	2.07933	-92606.5	-672188	-58.5375	-8.07559	8.07559	-0.68632	51.7334	574.506	395.181	174.005	333.763	240.743	0	0	1	3	3	0	9	0	45	3	6	23	15	75.0259	1.66724	0	0	16	0	0	22	0	4	2	0	1	1.73422	-2.73633	-0.515057	0.555881	2.69383	-2.80311	-0.456466	0.564488	2.6826
1	O=C(O)c1cnc(C(=O)NC2CN(c3nc(Nc4cc(OC)cc(OC)c4)c4c(n3)COC4)CC2)cc1	2.22025	-154990	-1.26293e+06	-100.453	-8.6737	8.6737	-1.37234	72.7486	822.674	618.817	203.856	562.677	259.997	0	0	3	5	9	0	18	0	63	4	13	37	21	107.241	1.70224	0	0	25	0	0	26	0	6	6	0	0	1.13255	-2.53099	-0.597842	0.565218	2.70927	-2.71375	-0.53082	0.665982	2.63058
1	Clc1cc(Nc2nc(NC3CCC(N)CC3)nc3n(Cc4ccc(OC)cc4)cnc23)ccc1	3.4369	-132066	-1.10068e+06	100.894	-8.25906	8.25906	-0.1627	73.3522	803.789	545.633	258.156	657.698	146.091	0	0	3	4	5	0	21	0	62	3	8	34	22	98.8063	1.59365	0	0	25	1	0	28	0	7	1	0	0	1.22442	-2.7981	-0.61613	0.6647	2.74562	-2.8347	-0.528178	0.773175	2.7876
1	Br[C@@H]1C[C@H](C)OC(=O)c2c(O)cc(OC)cc2/C=C\CCCC(=O)C1	3.52119	-108504	-826159	-182.75	-9.37503	9.37503	-0.56758	55.8362	578.465	364.831	213.634	399.561	178.904	0	0	3	4	4	0	6	0	48	1	5	25	18	71.716	1.49408	0	1	19	0	0	23	0	0	5	0	0	2.07468	-2.6265	-0.599157	0.460444	2.64723	-2.62508	-0.518125	0.517053	2.68949
1	O=C(Nc1n(-c2ccccc2)nc(C(C)(C)C)c1)c1cc(Oc2c3NC(=O)Nc3ccc2)ccc1	4.28261	-133581	-1.12629e+06	80.5569	-8.86774	8.86774	-0.63857	72.0958	785.358	465.732	319.625	576.827	208.531	0	0	2	3	3	0	23	0	60	3	6	35	24	93.5705	1.55951	0	0	27	0	0	25	0	5	3	0	0	1.17834	-2.60732	-0.584798	0.661273	2.58996	-2.53331	-0.505236	0.76014	2.67093
0	Clc1c(Oc2cc(C(F)(F)F)ccc2)ccc(Nc2ncnc3c2n(CCNC(=O)CC(O)(C)C)cc3)c1	5.75082	-172879	-1.35227e+06	-140.704	-9.01159	9.01159	-0.71045	74.1868	833.714	432.067	401.648	549.791	283.923	0	0	3	4	4	0	21	0	63	3	7	38	27	117.141	1.85939	0	0	26	1	3	25	0	5	3	0	0	1.23869	-2.61548	-0.599021	0.634224	2.62596	-2.70351	-0.491397	0.753042	2.60825
0	Fc1c(Oc2ncnc3scc(-c4ccccc4)c23)ccc(NC(=O)C=2C(=O)N(c3ccc(F)cc3)C=CC=2)c1	7.23854	-162298	-1.31134e+06	18.3963	-8.60406	8.60406	-0.88931	75.6223	814.651	406.155	403.366	673.342	141.308	0	0	3	4	4	0	27	0	58	1	5	40	29	102.743	1.77142	0	0	30	0	2	18	0	4	3	0	1	1.00097	-2.35503	-0.648476	0.698109	2.35845	-2.42534	-0.53808	0.811609	2.45859
0	Clc1c(F)ccc(Nc2ncnc3c2cc(NC(=O)NCCCN(CC)CC)c(O[C@@H]2COCC2)c3)c1	7.81866	-157509	-1.31291e+06	-64.9145	-8.62667	8.62667	-0.8757	78.8404	870.571	576.435	287.703	680.863	189.707	0	0	3	4	6	0	16	0	69	3	9	37	25	119.012	1.72481	0	0	26	1	1	32	0	6	3	0	0	1.34013	-2.699	-0.597728	0.539469	2.66774	-2.76823	-0.419266	0.719186	2.61042
0	Clc1c(F)ccc(Nc2ncnc3c2cc(NC(=O)NCCN2CCCC2)c(O[C@@H]2COCC2)c3)c1	6.52514	-153283	-1.26211e+06	-56.7526	-8.65713	8.65713	-0.91237	74.4132	827.517	563.477	259.031	682.687	144.829	0	0	3	4	6	0	16	0	64	3	9	36	24	113.033	1.76614	0	0	25	1	1	28	0	6	3	0	0	1.18673	-2.60933	-0.654253	0.609007	2.69318	-2.76717	-0.483853	0.784773	2.69934
0	Clc1c(Oc2c3c(scc3)ccc2)ccc(Nc2ncnc3NCCC(C(=O)NCCO)=Cc23)c1	5.9662	-139869	-1.11718e+06	33.7676	-8.2311	8.2311	-0.69427	71.6554	803.648	474.835	323.444	600.633	203.015	0	0	4	5	4	0	21	0	57	4	8	35	23	101.906	1.78783	0	0	25	1	0	22	0	5	3	0	1	1.13976	-2.50347	-0.644243	0.685671	2.50725	-2.68397	-0.605314	0.748573	2.52985
0	Clc1c(Oc2cc(Cl)ccc2)ccc(Nc2ncnc3c2n(CCNC(=O)C(S(=O)(=O)C)(C)C)cc3)c1	2.82272	-156800	-1.30486e+06	8.30493	-8.87049	8.87049	-1.13138	76.6378	835.029	412.888	422.142	643.444	191.585	0	0	3	5	5	0	21	0	62	2	7	37	24	115.358	1.86061	0	0	25	2	0	25	0	5	4	0	1	1.25894	-2.63113	-0.62667	0.646191	2.73525	-2.78375	-0.488363	0.773852	2.60761
0	Clc1c(Oc2c3c(snc3)ccc2)ccc(Nc2ncnc3c2n(CCNC(=O)C(N)(C)C)cc3)c1	8.35145	-142646	-1.23365e+06	104.729	-8.35461	8.35461	-0.41291	74.387	773.843	493.764	275.138	560.708	213.135	0	0	3	5	5	0	24	0	60	3	8	36	23	106.626	1.77711	0	0	25	1	0	24	0	7	2	0	1	1.10692	-2.59866	-0.604053	0.630303	2.59173	-2.81905	-0.52106	0.785263	2.50988
0	S(c1sc(NC(=O)Nc2ccc(C)cc2)nn1)c1ncnc2c1ccc(OCCCN1CCOCC1)c2	6.68208	-146862	-1.14903e+06	52.8529	-8.79635	8.79635	-1.25577	77.9094	881.155	572.486	303.305	673.214	207.94	0	0	3	5	8	0	21	0	64	2	10	37	24	113.115	1.76743	0	0	25	0	0	27	0	7	3	0	2	0.978168	-2.73107	-0.573589	0.589609	2.65192	-2.83114	-0.490609	0.69735	2.5727
0	O=C(Nc1c(C)ccc(NC(=O)c2cc3OCCOc3cc2)c1)c1cc2c(nc(C)cc2)cc1	2.72652	-130851	-1.02349e+06	-31.3028	-8.6003	8.6003	-0.72698	69.3642	769.882	469.005	295.207	657.714	112.168	0	0	3	4	5	0	22	0	57	2	7	34	25	87.296	1.53151	0	0	27	0	0	23	0	3	4	0	0	1.09293	-2.45976	-0.635507	0.652043	2.45318	-2.56333	-0.560485	0.720309	2.48232
0	Clc1c(Cl)ccc2c1n(C)c1C(=O)NC3(C(C#N)c21)CCNCC3	2.49913	-98952.2	-711893	50.9063	-8.81883	8.81883	-0.91196	50.1507	528.36	288.067	236.446	399.919	128.441	0	0	2	2	3	0	9	0	40	2	5	24	17	69.3903	1.73476	0	0	17	2	0	16	0	4	1	0	0	1.7099	-2.7969	-0.604371	0.578691	2.78301	-2.91352	-0.467554	0.672638	2.73354
0	O=C(OCC)C=1C(=O)N=C2c3c4c(cccc4C=12)ccc3	5.0659	-80545.4	-511579	14.7395	-9.24068	9.24068	-1.73243	40.7607	494.565	278.078	205.845	360.28	134.285	1	1	0	0	3	0	10	0	32	0	3	21	14	47.7045	1.49077	0	0	17	0	0	11	0	1	3	0	0	1.64096	-2.36705	-0.558627	0.657516	2.42443	-2.39221	-0.455551	0.741067	2.48493
0	FC(F)(F)c1cc(NCc2cc([N+](=O)[O-])ccc2)c2c(ncc(N3CCN(C(=O)C)CC3)c2)c1	4.23493	-154401	-1.1766e+06	-89.7717	-8.75769	8.75769	-1.44244	64.7264	712.924	369.757	338.509	450.876	262.048	0	0	2	3	2	0	16	0	56	1	3	34	26	101.943	1.82041	0	0	23	0	3	22	0	5	3	0	0	1.3846	-2.72269	-0.522294	0.566765	2.64323	-2.85881	-0.441973	0.624312	2.54996
0	FC(F)(F)c1c(c(C(C)C)[nH]n1)-c1nc(Nc2ncc(N3CCC(N(C)C)CC3)cc2)ncc1	7.01877	-148803	-1.17572e+06	10.0499	-8.43128	8.43128	-0.28602	70.288	757.576	539.76	217.817	511.593	245.984	0	0	3	4	6	0	17	0	63	3	9	34	24	102.89	1.63318	0	0	23	0	3	29	0	8	0	0	0	1.26904	-2.79459	-0.40032	0.438996	2.71557	-2.84593	-0.353277	0.530239	2.69619
0	Clc1c(c(C(C)C)n[nH]1)-c1nc(Nc2ncc(N3CCC(N(C)C)CC3)cc2)ncc1	2.97822	-120888	-976215	155.413	-8.41802	8.41802	-0.33419	69.037	739.641	544.89	194.752	583.713	155.928	0	0	3	4	6	0	17	0	60	3	9	31	20	91.4245	1.52374	0	0	22	1	0	29	0	8	0	0	0	1.21939	-2.79459	-0.45867	0.48159	2.71557	-2.84593	-0.351497	0.595263	2.69619
0	[S@H0](=O)(CC)c1ccc(-c2c3c(oc2)ccc(-c2oc(C)cc2)c3)cc1	3.20918	-94289	-664301	10.6758	-8.46896	8.46896	-0.68411	54.2683	620.589	347.615	268.449	529.714	90.8744	0	0	2	3	1	0	20	0	43	0	1	25	17	61.2772	1.42505	0	0	21	0	0	18	0	0	3	0	1	1.34403	-2.39845	-0.636703	0.708487	2.45406	-2.42249	-0.502325	0.805915	2.48313
0	[S@H0](=O)(C)c1ccc(-c2c3c(oc2)ccc(-c2oc(C)cc2)c3)cc1	4.1714	-90696.7	-621415	16.2863	-8.49535	8.49535	-0.63803	51.1747	597.972	307.972	285.506	531.275	66.6967	0	0	2	2	1	0	20	0	40	0	1	24	16	57.6837	1.44209	0	0	20	0	0	16	0	0	3	0	1	1.3617	-2.28354	-0.636705	0.708486	2.3308	-2.29669	-0.502359	0.805915	2.47321
0	O(CC12OC(CC1)CC2)c1cc(-c2c3c(N)ncnc3n(C3CC(CN4CCC4)C3)c2)ccc1	3.21999	-128609	-1.15019e+06	222.294	-8.35409	8.35409	-0.18233	76.6282	769.02	425.106	126.78	591.865	177.155	0	0	3	4	5	0	15	0	67	1	6	34	24	97.9714	1.46226	0	0	27	0	0	33	0	5	2	0	0	0.981403	-2.87758	-0.563691	0.576048	2.86664	-2.88209	-0.475116	0.69247	2.90202
0	N(c1nc(NC2CC2)c2occc2n1)c1cc2[nH]nc(C)c2cc1	2.28651	-91169.1	-644914	170.78	-8.45207	8.45207	-0.34253	47.9907	553.643	333.485	215.088	381.703	171.94	0	0	4	5	4	0	18	0	40	4	8	24	13	63.8805	1.59701	0	0	17	0	0	16	0	6	1	0	0	1.19542	-2.2956	-0.629708	0.684291	2.75145	-2.36908	-0.557949	0.7504	2.79885
0	FC(F)(F)CNc1nc(Nc2cc3[nH]ncc3cc2)nc2c1occ2	3.01228	-117282	-716396	-8.37784	-8.81659	8.81659	-0.62376	42.8077	557.179	288.132	263.166	305.867	251.312	0	0	4	5	4	0	18	0	36	4	8	25	14	69.1955	1.9221	0	0	15	0	3	11	0	6	1	0	0	1.33697	-2.35853	-0.64802	0.743892	2.50702	-2.53482	-0.625664	0.811874	2.4017
0	Clc1c(N2CCOCC2)ccc(Nc2nc(NCC(F)(F)F)c3occc3n2)c1	2.53009	-139321	-929240	-106.136	-8.82024	8.82024	-0.6348	53.9705	656.055	373.843	282.212	439.732	216.323	0	0	2	3	3	0	15	0	46	2	5	29	18	91.1738	1.98204	0	0	18	1	3	17	0	5	2	0	0	1.2956	-2.66391	-0.601126	0.690442	2.59941	-2.7808	-0.479022	0.765021	2.52993
0	Fc1ccc(NC(=O)C2(C(=O)Nc3ccc(Oc4c5c(ncc4)cc(OC)c(OC)c5)cc3)CC2)cc1	4.55271	-152653	-1.20237e+06	-72.074	-8.64758	8.64758	-0.38748	73.15	838.716	531.419	301.814	707.467	131.249	0	0	3	4	5	0	22	0	61	2	7	37	27	100.765	1.65189	0	0	28	0	1	24	0	3	5	0	0	1.06354	-2.34031	-0.637821	0.687911	2.84291	-2.48464	-0.565058	0.789179	2.84814
0	S(=O)(=O)(C=C)N1[C@@H](Cn2c3ncnc(N)c3c(-c3cc4OCOc4cc3)c2)CCC1	4.41489	-123535	-978362	4.93664	-8.35096	8.35096	-0.64231	60.8107	643.611	420.76	218.982	381.575	262.035	0	0	2	4	6	0	15	0	51	1	7	30	16	91.0068	1.78445	0	0	20	0	0	21	0	5	4	0	1	1.31261	-2.6017	-0.628383	0.6594	2.73936	-2.65997	-0.606435	0.735759	2.75415
0	O=C(Nc1scc(-c2ccncc2)n1)Cc1cc(OCCCN2CCNCC2)ccc1	3.77407	-119568	-930100	33.5647	-8.79314	8.79314	-0.55028	68.4874	768.027	558.053	209.974	657.314	110.713	0	0	3	4	6	0	17	0	58	2	8	31	22	93.7294	1.61602	0	0	23	0	0	27	0	5	2	0	1	1.0851	-2.76435	-0.619056	0.66466	2.66043	-2.91339	-0.53808	0.769793	2.56698
0	Clc1c(F)ccc(Nc2ncnc3sc(NC(=O)C=C)cc23)c1	7.58816	-98177.3	-591642	38.7193	-8.46182	8.46182	-0.77009	43.9069	563.537	256.125	301.584	394.578	168.959	0	0	2	3	3	0	15	0	33	2	5	23	15	66.6424	2.01947	0	0	15	1	1	10	0	4	1	0	1	1.54333	-2.24666	-0.665928	0.696805	2.2358	-2.26485	-0.522023	0.899873	2.42645
0	Clc1c(F)ccc(Nc2ncnc3sc(NC(=O)/C=C/CN4C5C(=O)CC(C4)CC5)cc23)c1	6.74605	-137461	-1.00708e+06	4.90247	-8.45813	8.45813	-0.79413	67.2237	759.176	425.222	329.01	572.746	186.43	0	0	3	4	5	0	15	0	54	2	7	33	22	100.874	1.86803	0	0	23	1	1	21	0	5	2	0	1	1.04396	-2.84842	-0.623738	0.650819	2.81895	-2.89228	-0.513195	0.774179	2.81789
0	Clc1c(NC(=O)N(C)c2ncnc(Nc3ccc(N4CCN(CC)CC4)cc3)c2)c(Cl)c(OC)cc1OC	3.58229	-159348	-1.35471e+06	66.2181	-8.39229	8.39229	-0.18318	80.8966	891.283	648.107	243.176	741.135	150.148	0	0	3	4	6	0	18	0	69	2	8	38	24	119.29	1.72884	0	0	26	2	0	31	0	7	3	0	0	1.22633	-2.76293	-0.585357	0.461024	2.65717	-2.87901	-0.463955	0.667434	2.57258
0	O=C(NCC1CC1)c1ccc(-c2c(C)ccc(NC(=O)c3cc(N4CCCCC4)ncc3)c2)cc1	6.13489	-129612	-1.08898e+06	37.7066	-8.86152	8.86152	-0.43518	78.3814	838.97	575.852	261.637	689.332	149.638	0	0	2	3	3	0	18	0	67	2	5	35	26	95.5465	1.42607	0	0	29	0	0	32	0	4	2	0	0	1.06898	-2.74031	-0.608262	0.648952	2.78258	-2.73955	-0.53808	0.714369	2.87033
0	S(=O)(=O)(c1c(F)cc(F)cc1)C=1C(=O)N(C)c2nc(Nc3cc4c([nH]cc4)cc3)ncc2C=1	9.17744	-142505	-1.07284e+06	-7.93642	-8.79906	8.79906	-1.43409	60.6419	673.388	364.837	304.078	488.365	185.022	0	0	3	5	5	0	21	0	48	2	7	33	21	93.0028	1.93756	0	0	22	0	2	15	0	5	3	0	1	1.20298	-2.4168	-0.636161	0.691919	2.50196	-2.52263	-0.53756	0.802328	2.45968
0	Fc1c(OC[C@H]2OCCC2)cccc1-c1c2c(N)ncnc2n(C2CC(N3CCN(C(=O)C)CC3)C2)c1	2.05769	-152134	-1.32797e+06	-32.3977	-8.28549	8.28549	-0.24276	79.0872	824.307	542.6	185.54	651.092	173.215	0	0	3	4	6	0	15	0	70	1	7	37	24	113.938	1.62769	0	0	27	0	1	33	0	6	3	0	0	1.07406	-2.86913	-0.610053	0.632022	2.81217	-2.92637	-0.510136	0.682709	2.85692
0	O(C[C@H]1OCCC1)c1cc(-c2c3c(N)ncnc3n(C3CC(CN4CCC4)C3)c2)ccc1	4.74933	-122229	-1.04032e+06	59.1954	-8.26233	8.26233	-0.14072	71.7746	756.328	410.526	127.238	594.397	161.93	0	0	3	4	5	0	15	0	63	1	6	32	22	93.2825	1.48067	0	0	25	0	0	31	0	5	2	0	0	1.06939	-2.87758	-0.565919	0.604896	2.8182	-2.88209	-0.481261	0.713345	2.90201
0	O=C(N)C(NC=1C(=O)C(=O)C=1Nc1ccncc1)c1cc(O)ccc1	2.14289	-103211	-694663	0.1216	-8.63072	8.63072	-1.02789	46.8631	563.686	348.081	215.605	312.612	251.074	0	0	3	5	5	0	12	0	39	4	9	25	14	67.3409	1.72669	0	0	17	0	0	14	0	4	4	0	0	1.60958	-2.4503	-0.6237	0.671261	2.50408	-2.63569	-0.582525	0.754281	2.4646
0	Cl[C@@H]1C[C@H](C)OC(=O)c2c(O)cc(OC)cc2/C=C\CCCC(=O)C1	4.44782	-108977	-816886	-194.955	-9.36008	9.36008	-0.38886	54.9662	565.826	350.271	215.556	391.454	174.372	0	0	3	4	4	0	6	0	48	1	5	25	18	71.716	1.49408	0	0	19	1	0	23	0	0	5	0	0	2.07468	-2.6235	-0.599273	0.460553	2.6507	-2.62727	-0.518725	0.51676	2.6856
0	O=C(Nc1c(N2CCOCC2)ccc(C)c1)Nc1ccc(-c2c3c(C)n[nH]c3ncc2)cc1	3.58589	-125414	-1.03211e+06	80.3482	-8.75612	8.75612	-0.42726	69.5406	741.497	517.883	219.396	593.844	147.653	0	0	4	5	5	0	21	0	59	5	10	33	23	91.2583	1.54675	0	0	25	0	0	26	0	6	2	0	0	1.10024	-2.66619	-0.527663	0.610937	2.60114	-2.7816	-0.4305	0.708086	2.53885
0	Clc1c(OCc2cc(F)ccc2)ccc(Nc2ncnc3c2cc(-c2oc(CNCCS(=O)(=O)C)cc2)cc3)c1	4.92105	-166712	-1.3459e+06	-13.2719	-8.64729	8.64729	-1.10485	81.6216	922.682	505.303	411.398	740.477	182.205	0	0	3	4	6	0	27	0	66	2	8	40	27	119.837	1.81571	0	0	29	1	1	26	0	4	4	0	1	1.04771	-2.5954	-0.641017	0.666193	2.61062	-2.74165	-0.509216	0.78372	2.49453
0	Clc1cc(CNc2nc(NC3CCC(N)CC3)nc3n(CCC(C)C)cnc23)ccc1	2.78302	-120084	-1.00791e+06	83.3486	-8.2467	8.2467	-0.09184	71.6974	785.613	545.061	240.553	607.338	178.275	0	0	3	4	4	0	15	0	63	3	7	31	20	92.8752	1.47421	0	0	23	1	0	32	0	7	0	0	0	1.36448	-2.79812	-0.578226	0.623175	2.74563	-2.8347	-0.506549	0.697072	2.78763
0	Clc1cc(CNc2nc(NC3CCC(N)CC3)nc3n(CCCC)cnc23)ccc1	3.28155	-116492	-954797	85.514	-8.19713	8.19713	-0.07626	68.6038	759.683	530.623	229.06	598.993	160.69	0	0	3	4	4	0	15	0	60	3	7	30	19	89.4477	1.4908	0	0	22	1	0	30	0	7	0	0	0	1.35906	-2.79812	-0.578279	0.626811	2.74563	-2.8347	-0.513498	0.698053	2.78762
0	Clc1cc(Nc2nc(N[C@H]3[C@@H](N)CCCC3)nc3n(CC)cnc23)ccc1	3.36648	-105711	-841953	105.86	-8.40036	8.40036	-0.33589	59.323	629.352	428.17	201.181	487.939	141.413	0	0	3	4	4	0	15	0	51	3	7	27	16	78.8925	1.54691	0	0	19	1	0	24	0	7	0	0	0	1.42221	-2.79902	-0.654755	0.675115	2.74833	-2.87633	-0.544944	0.741488	2.79648
0	O=C(Nc1cc(C#N)ccc1)Nc1ccc(-c2c3c(C)n[nH]c3ncc2)cc1	1.394	-103015	-734086	152.974	-8.9616	8.9616	-0.50857	55.0307	639.577	383.765	250.129	421.215	218.362	0	0	4	6	5	0	21	0	44	5	10	28	18	68.4666	1.55606	0	0	21	0	0	16	0	6	1	0	0	1.21095	-2.31946	-0.620926	0.679092	2.28121	-2.40314	-0.515471	0.783702	2.44264
0	O=C1N(CCCCCCCCCCCC)C(=O)c2c3c(c(NCCNCCN(C)C)ccc13)ccc2	7.08063	-137099	-1.1794e+06	-83.0841	-8.57528	8.57528	-1.1691	89.4765	963.401	758.378	194.518	851.139	112.263	0	0	3	4	4	0	10	0	82	2	6	36	28	110.029	1.34181	0	0	30	0	0	46	0	4	2	0	0	1.39175	-2.73188	-0.533514	0.593098	2.66494	-2.82286	-0.424512	0.668472	2.83024
0	O=C1C(=O)C(Nc2cc(-c3occc3)ncc2)=C1N[C@H](C)c1ccccc1	5.52327	-103767	-751360	71.3823	-8.44142	8.44142	-0.75869	54.0015	623.288	349.647	273.641	470.62	152.669	0	0	2	3	3	0	17	0	44	2	5	27	17	68.9797	1.56772	0	0	21	0	0	17	0	3	3	0	0	1.29917	-2.52515	-0.614731	0.663046	2.50766	-2.57482	-0.53319	0.762469	2.5685
0	O=C(O)c1cnc(C(=O)NC2CN(c3nc(Nc4cc(OC)c(OC)cc4)c4c(n3)COC4)CC2)cc1	1.04957	-154987	-1.25142e+06	-96.8289	-8.36429	8.36429	-1.34308	72.7486	832.181	637.794	194.387	573.136	259.044	0	0	3	5	9	0	18	0	63	4	13	37	21	107.241	1.70224	0	0	25	0	0	26	0	6	6	0	0	1.12181	-2.53099	-0.598716	0.595853	2.70927	-2.71375	-0.525236	0.655805	2.63055
0	[SH0](=O)(C)c1cc(C)c(-c2n(C)c(c(-c3ccncc3)n2)-c2cc3c(cc(OC)cc3)cc2)cc1	4.69969	-124107	-1.06075e+06	89.1902	-8.53805	8.53805	-0.67937	73.7538	762.909	514.814	239.142	670.986	91.9222	0	0	3	4	4	0	27	0	59	0	4	34	27	89.6187	1.51896	0	0	28	0	0	25	0	3	2	0	1	1.31458	-2.34338	-0.603577	0.651876	2.36748	-2.30501	-0.527859	0.75221	2.50223
0	O=C(Nc1n(-c2ccc(C)cc2)nc(C(C)(C)C)c1)Nc1c2c(c(OCCN3CCOCC3)cc1)cccc2	5.04502	-149234	-1.35254e+06	64.2257	-8.21922	8.21922	-0.43999	87.1373	924.931	625.309	288.864	812.024	112.907	0	0	3	4	5	0	21	0	76	2	7	39	29	112.148	1.47563	0	0	31	0	0	37	0	5	3	0	0	1.14277	-2.71726	-0.51581	0.601499	2.6414	-2.83791	-0.433247	0.702802	2.67093
0	S(c1n2c(C(F)=CC(c3cn(C)nc3)=C2)nn1)c1cc2c(ncc3N(C)C(=O)COc23)cc1	6.24913	-133740	-994626	144.717	-8.16046	8.16046	-1.01401	62.1497	695.876	429.961	261.06	543.582	152.293	0	0	3	3	6	0	20	0	49	0	6	33	21	91.3618	1.86453	0	0	22	0	1	16	0	7	2	0	1	1.10121	-2.45586	-0.553479	0.572949	2.45188	-2.58975	-0.469275	0.655475	2.48796
0	Clc1c(Cl)cccc1NC(=O)Nc1c(C(=O)N2CCN(CCN(C)C)C(=O)CC2)cc(C(C)(C)C)s1	4.78366	-152028	-1.41124e+06	-48.502	-9.22127	9.22127	-0.67872	81.1702	771.559	461.851	309.707	618.511	153.048	0	0	3	4	4	0	11	0	69	2	6	36	25	120.562	1.74728	0	0	25	2	0	33	0	5	3	0	1	1.64021	-2.66078	-0.400161	0.449548	2.65606	-2.7858	-0.164932	0.594962	2.68774
0	O=C1C(=O)C(Nc2cc(-c3cscc3)ncc2)=C1N[C@H](C)c1ccccc1	4.99382	-100886	-744638	91.9592	-8.36432	8.36432	-0.67463	56.0995	630.824	333.722	297.102	497.43	133.394	0	0	2	3	3	0	17	0	44	2	5	27	20	71.7346	1.63033	0	0	21	0	0	17	0	3	2	0	1	1.29919	-2.52518	-0.637789	0.656843	2.5076	-2.57482	-0.586225	0.764379	2.56851
0	O=C1C(=O)C(Nc2ccncc2)=C1N[C@H](C)c1ccccc1	5.81524	-83972.3	-559023	59.8319	-8.41541	8.41541	-0.70071	44.8259	532.747	335.067	197.68	388.921	143.826	1	0	0	1	3	0	12	0	37	2	5	22	15	57.9047	1.56499	0	0	17	0	0	15	0	3	2	0	0	1.51709	-2.52515	-0.620573	0.697531	2.50744	-2.57483	-0.53808	0.805915	2.56842
0	O=C(NCCCC)Nc1ccc(-c2c3c(C)n[nH]c3ncc2)cc1	5.9885	-91022.5	-638442	68.2811	-8.6882	8.6882	-0.37391	51.9847	609.65	428.311	175.951	442.134	167.516	0	0	4	5	4	0	15	0	45	5	9	24	16	68.2264	1.51614	0	0	18	0	0	21	0	5	1	0	0	1.4343	-2.60112	-0.533319	0.654663	2.54	-2.66738	-0.441403	0.711723	2.63471
0	O=C(N)C(NC=1C(=O)C(=O)C=1Nc1ccncc1)c1ccccc1	3.50025	-95818.6	-643266	28.4273	-8.56051	8.56051	-0.97024	46.0611	556.553	335.015	221.539	352.802	203.751	0	0	2	4	4	0	12	0	38	3	7	24	14	63.8765	1.68096	0	0	17	0	0	14	0	4	3	0	0	1.59607	-2.45099	-0.626828	0.66052	2.50279	-2.63589	-0.53808	0.762782	2.44697
0	O=C(O)c1cnc(C(=O)NC2CN(c3nc(Nc4cc(C)c(C)cc4)c4c(n3)COC4)CC2)cc1	2.33093	-140231	-1.12811e+06	-39.2607	-8.54936	8.54936	-1.33026	71.1446	791.789	549.013	242.776	545.784	246.004	0	0	4	6	7	0	18	0	61	4	11	35	21	99.9574	1.63865	0	0	25	0	0	26	0	6	4	0	0	1.11848	-2.53099	-0.585993	0.572549	2.70927	-2.71375	-0.49725	0.639867	2.63046
0	O=C(O)c1cnc(C(=O)NC2CN(c3nc(NCCCCCCC)c4c(n3)COC4)CC2)cc1	1.949	-139223	-1.10176e+06	-65.6359	-8.61127	8.61127	-1.29579	73.3854	836.674	647.588	189.087	564.756	271.919	0	0	4	6	7	0	12	0	66	4	11	34	20	105.381	1.59668	0	0	24	0	0	32	0	6	4	0	0	1.20914	-2.68572	-0.557442	0.581855	2.7094	-2.71382	-0.503372	0.606258	2.76987
0	O=C(O)c1cnc(C(=O)NC2CN(c3nc(NCCCCC)c4c(n3)COC4)CC2)cc1	1.9615	-132036	-1.01439e+06	-85.1298	-8.62883	8.62883	-1.30482	67.1982	780.057	592.677	187.379	502.75	277.306	0	0	3	5	7	0	12	0	60	4	11	32	18	98.1902	1.6365	0	0	22	0	0	28	0	6	4	0	0	1.23474	-2.63948	-0.557447	0.581855	2.70938	-2.71382	-0.503385	0.606258	2.70389
0	O=C(O)c1cnc(C(=O)NC2CN(c3nc(NCCCOC)c4c(n3)COC4)CC2)cc1	3.44031	-135825	-1.02051e+06	-89.6906	-8.65151	8.65151	-1.33735	64.9066	765.303	599.743	165.56	505.719	259.584	0	0	3	5	8	0	12	0	58	4	12	32	17	98.1934	1.69299	0	0	21	0	0	26	0	6	5	0	0	1.23474	-2.56335	-0.54206	0.555806	2.70937	-2.71383	-0.491381	0.5765	2.63127
0	O=C(O)c1cnc(C(=O)NC2CN(c3nc(Nc4cc5OCCOc5cc4)c4c(n3)COC4)CC2)cc1	3.7375	-154354	-1245716	-93.6089	-8.51923	8.51923	-1.33829	71.415	792.583	577.51	215.073	526.616	265.966	0	0	3	5	9	0	18	0	61	4	13	37	21	104.62	1.71508	0	0	25	0	0	24	0	6	6	0	0	1.00252	-2.53099	-0.607031	0.633952	2.70927	-2.71375	-0.540903	0.665776	2.63068
0	O=C(O)c1cnc(C(=O)NC2CN(c3nc(NCCCCCC)c4c(n3)COC4)CC2)cc1	2.26654	-135629	-1.05815e+06	-91.9128	-8.60824	8.60824	-1.31515	70.2918	811.529	621.198	190.331	537.294	274.235	0	0	4	6	7	0	12	0	63	4	11	33	19	101.81	1.61604	0	0	23	0	0	30	0	6	4	0	0	1.22304	-2.6663	-0.557443	0.581855	2.70939	-2.71382	-0.503375	0.606258	2.7427
0	O=C1N(CCCCCCCCCCCCCCCC)C(=O)c2c3c(c(NCCNCCN(C)C)ccc13)ccc2	7.0819	-151473	-1.34713e+06	-110.455	-8.5777	8.5777	-1.17016	101.851	1092.35	872.745	208.737	977.115	115.234	0	0	3	4	4	0	10	0	94	2	6	40	32	122.394	1.30206	0	0	34	0	0	54	0	4	2	0	0	1.29662	-2.74587	-0.533514	0.593098	2.67633	-2.82286	-0.424512	0.668472	2.84681
0	O=C(Nc1ccc(C(=O)N2CCN(C(C)C)CC2)cc1)Nc1ccc(-c2nc(N3C4COCC3CC4)nc(C3CCOCC3)n2)cc1	4.52532	-185004	-1.77871e+06	28.8824	-8.96757	8.96757	-0.70189	102.947	1034.18	770.258	258.692	855.272	178.907	0	0	3	5	8	0	18	0	91	2	10	47	30	140.469	1.54362	0	0	35	0	0	44	0	8	4	0	0	0.84846	-2.7809	-0.642633	0.656138	2.80472	-2.89117	-0.53808	0.693553	2.76288
0	O=C(/C=C/c1sc2ncc(C#N)c(Nc3c(C)c4c([nH]cc4)cc3)c2c1)N1CCCC1	3.17434	-113195	-888294	125.607	-8.37085	8.37085	-1.15874	65.4447	710.907	416.018	286.091	534.646	176.262	0	0	2	3	3	0	18	0	52	2	5	31	23	82.5355	1.58722	0	0	24	0	0	21	0	5	1	0	1	1.19027	-2.44393	-0.589003	0.642866	2.66716	-2.54693	-0.523973	0.772287	2.68255
0	O=C(O)c1cnc(C(=O)NC2CN(c3nc(Nc4ccc(C)cc4)c4c(n3)COC4)CC2)cc1	1.7447	-136637	-1.07471e+06	-29.6772	-8.56553	8.56553	-1.33764	68.051	768.51	534.221	234.289	523.228	245.282	0	0	4	6	7	0	18	0	58	4	11	34	20	96.1749	1.65819	0	0	24	0	0	24	0	6	4	0	0	1.11068	-2.53099	-0.60464	0.633952	2.70927	-2.71375	-0.53808	0.665776	2.63032
0	O=C(O)c1cnc(C(=O)NC2CN(c3nc(NCCCOCC)c4c(n3)COC4)CC2)cc1	2.66213	-139418	-1.06431e+06	-106.407	-8.64576	8.64576	-1.31786	68.0002	804.365	622.207	182.158	520.885	283.48	0	0	3	5	8	0	12	0	61	4	12	33	18	101.942	1.67118	0	0	22	0	0	28	0	6	5	0	0	1.22304	-2.57908	-0.541995	0.555806	2.70937	-2.71384	-0.491375	0.5765	2.63138
0	O=C(O)c1cnc(C(=O)NC2CN(c3nc(NC4CCCCC4)c4c(n3)COC4)CC2)cc1	3.02877	-134990	-1097886	-82.0819	-8.62698	8.62698	-1.3762	68.9582	755.618	569.319	186.299	512.722	242.895	0	0	3	5	7	0	12	0	61	4	11	33	19	99.6173	1.63307	0	0	23	0	0	28	0	6	4	0	0	1.11223	-2.78578	-0.587768	0.633951	2.72748	-2.72138	-0.503721	0.665776	2.83779
0	O=C(O)c1cnc(C(=O)NC2CN(c3nc(Nc4ccc(OC)cc4)c4c(n3)COC4)CC2)cc1	2.12703	-144017	-1.13153e+06	-62.9217	-8.48869	8.48869	-1.34041	68.853	780.744	568.903	211.841	529.754	250.99	0	0	3	5	8	0	18	0	59	4	12	35	20	99.8783	1.69285	0	0	24	0	0	24	0	6	5	0	0	1.10545	-2.53099	-0.609878	0.615141	2.70927	-2.71375	-0.526588	0.663007	2.63035
0	O=C(O)c1cnc(C(=O)NC2CN(c3nc(Nc4ccc(CC)cc4)c4c(n3)COC4)CC2)cc1	1.64811	-140231	-1.1264e+06	-27.7816	-8.59302	8.59302	-1.33389	71.1446	798.085	562.477	235.607	528.154	269.931	0	0	4	6	7	0	18	0	61	4	11	35	21	99.9574	1.63865	0	0	25	0	0	26	0	6	4	0	0	1.10545	-2.53099	-0.604036	0.633952	2.70927	-2.71375	-0.53808	0.665776	2.63037
0	O=C(NCC)Nc1ccc(-c2c3c(C)n[nH]c3ncc2)cc1	5.56473	-83835.5	-563237	87.7287	-8.7552	8.7552	-0.32769	45.7975	545.111	374.416	165.27	380.822	164.289	0	0	3	3	4	0	15	0	39	5	9	22	14	61.0342	1.56498	0	0	16	0	0	17	0	5	1	0	0	1.50871	-2.46549	-0.533828	0.654668	2.39473	-2.63718	-0.441407	0.711771	2.44265
0	O=C(NCc1ccccc1)Nc1ccc(-c2c3c(C)n[nH]c3ncc2)cc1	5.71267	-99217.5	-715186	114.475	-8.72415	8.72415	-0.35315	55.9311	640.006	404.572	230.233	494.467	145.539	0	0	4	5	4	0	21	0	46	5	9	27	19	69.5249	1.51141	0	0	21	0	0	19	0	5	1	0	0	1.18582	-2.41227	-0.643504	0.697561	2.34737	-2.53345	-0.53808	0.805915	2.44504
0	O=C(Nc1cc(C)ccc1)Nc1ccc(C2c3c(C)n[nH]c3N=C(O)C2)cc1	3.73915	-107251	-797542	60.0079	-8.70189	8.70189	-0.06261	58.0667	645.701	390.052	255.649	449.105	196.596	0	0	4	5	5	0	17	0	49	5	10	28	18	77.0338	1.57212	0	0	21	0	0	21	0	5	2	0	0	1.24037	-2.49614	-0.587645	0.669127	2.54185	-2.42947	-0.481013	0.754432	2.63904
0	Fc1c(NC(=O)Nc2ccc(C3c4c(C)n[nH]c4N=C(O)C3)cc2)cc(C)cc1	2.75493	-118122	-859106	14.4654	-8.73522	8.73522	-0.09152	57.9569	651.336	383.991	267.345	457.186	194.15	0	0	4	5	5	0	17	0	49	5	10	29	19	82.8339	1.69049	0	0	21	0	1	20	0	5	2	0	0	1.24987	-2.4961	-0.614893	0.669154	2.54186	-2.42983	-0.478206	0.78972	2.63904
0	O=C(NCCC)Nc1ccc(-c2c3c(C)n[nH]c3ncc2)cc1	5.8838	-87429.2	-601130	74.8751	-8.65527	8.65527	-0.43034	48.8911	579.981	404.532	170.449	413.354	166.627	0	0	4	5	4	0	15	0	42	5	9	23	15	64.6702	1.53977	0	0	17	0	0	19	0	5	1	0	0	1.47154	-2.54608	-0.533365	0.654664	2.48369	-2.65823	-0.441403	0.711728	2.53119
0	O=C(Nc1ccc(-c2c3c(C)n[nH]c3ncc2)cc1)NC1CCCCC1	5.37359	-97572	-727270	62.8278	-8.87859	8.87859	-0.23982	56.8382	626.994	446.167	176.546	491.081	135.913	0	0	4	5	4	0	15	0	49	5	9	26	18	73.0307	1.49042	0	0	20	0	0	23	0	5	1	0	0	1.22408	-2.78433	-0.583725	0.633219	2.72972	-2.77605	-0.513468	0.735414	2.83213
0	O=C(OC)N1CCC(n2ncc3c(N4CCOCC4)nc(-c4ccc(N)cc4)nc23)CC1	2.31694	-129043	-1.0661e+06	24.565	-8.48572	8.48572	-0.65116	66.8294	727.095	577.053	141.412	573.201	153.894	0	0	2	3	5	0	15	0	59	1	6	32	18	96.1801	1.63017	0	0	22	0	0	27	0	7	3	0	0	1.28816	-2.7371	-0.543074	0.576716	2.71088	-2.78109	-0.473117	0.640548	2.75025
0	O(C(C)(C)C)C(=O)N1CCC(n2ncc3c(N4CCOCC4)nc(-c4ccc(N)cc4)nc23)CC1	2.2326	-139813	-1.2306e+06	14.4928	-8.44843	8.44843	-0.60677	76.1102	804.156	605.377	188.478	612.968	191.188	0	0	3	4	5	0	15	0	68	1	6	35	21	106.98	1.57323	0	0	25	0	0	33	0	7	3	0	0	1.24948	-2.74113	-0.469458	0.383922	2.71475	-2.78111	-0.422603	0.478833	2.75148
0	S(=O)(=O)(N1CCN(C)CC1)c1cc(/C=C/c2c(Nc3c(C)c4c([nH]cc4)cc3)c(C#N)cnc2C)ccc1	5.05334	-142955	-1.40289e+06	114.497	-8.2318	8.2318	-0.74143	82.1478	778.184	503.213	269.147	620.183	158.002	0	0	3	5	5	0	21	0	68	2	7	38	28	108.35	1.59338	0	0	29	0	0	30	0	6	2	0	1	1.1984	-2.76186	-0.564419	0.620548	2.66893	-2.88286	-0.470427	0.713495	2.56027
0	S(=O)(=O)(N1CCN(C)CC1)c1cc(/C=C/c2c(Nc3c(C)c4c([nH]cc4)cc3)c(C#N)cnc2)ccc1	0							79.0542	706.368	454.903	245.942	560.383	145.985	0	0	3	5	5	0	21	0	65	2	7	37	27	104.732	1.61127	0	0	28	0	0	28	0	6	2	0	1	1.16869	-2.76186	-0.566969	0.629534	2.66893	-2.88286	-0.471959	0.72222	2.56018
0	Fc1c(-c2nccc(NC=3C(=O)C(=O)C=3N[C@H](C)c3ccccc3)c2)cccc1	4.19875	-113814	-847049	45.0202	-8.42732	8.42732	-0.64526	57.9433	657.619	376.227	278.691	520.476	137.143	0	0	2	3	3	0	18	0	47	2	5	29	22	75.2102	1.60022	0	0	23	0	1	18	0	3	2	0	0	1.3086	-2.52518	-0.637789	0.670184	2.50762	-2.57483	-0.529088	0.792042	2.5685
0	O=C(NCCO)c1ccc(-c2c3c(/C=C\4/C(=O)c5c(O)cccc5O/4)cn(C)c3ncc2)cc1	6.39405	-134624	-1.11172e+06	-42.8791	-8.57726	8.57726	-1.19393	67.0727	693.369	454.046	233.802	542.187	151.182	0	0	3	5	5	0	21	0	55	3	8	34	23	87.1602	1.58473	0	0	26	0	0	21	0	3	5	0	0	1.2313	-2.46372	-0.646032	0.700273	2.42613	-2.6737	-0.53808	0.66982	2.47546
0	O=C1N(CCCCCC)C(=O)c2c3c(c(NCCNCCN(C)C)ccc13)ccc2	7.0598	-115537	-926735	-42.0591	-8.57601	8.57601	-1.16832	70.915	782.697	598.934	172.292	666.525	116.171	0	0	3	4	4	0	10	0	64	2	6	30	22	90.9872	1.42167	0	0	24	0	0	34	0	4	2	0	0	1.53125	-2.66669	-0.533514	0.593098	2.61416	-2.82286	-0.424512	0.668472	2.74293
0	O=C1N(CCCC)C(=O)c2c3c(c(NCCNCCN(C)C)ccc13)ccc2	7.04331	-108350	-840546	9.27018	-8.57498	8.57498	-1.16616	64.7278	715.658	540.671	163.623	602.802	112.856	0	0	2	3	4	0	10	0	58	2	6	28	20	84.4487	1.45601	0	0	22	0	0	30	0	4	2	0	0	1.5555	-2.65902	-0.533515	0.5931	2.56703	-2.82286	-0.424513	0.668472	2.64463
0	O=C1N(CC)C(=O)c2c3c(c(NCCNCCN(C)C)ccc13)ccc2	7.0171	-101162	-750698	-14.76	-8.5847	8.5847	-1.17384	58.5406	652.807	486.743	155.635	537.807	115	0	0	2	3	4	0	10	0	52	2	6	26	18	77.7729	1.49563	0	0	20	0	0	26	0	4	2	0	0	1.55051	-2.65898	-0.533567	0.59316	2.54612	-2.82286	-0.424587	0.668474	2.47862
0	O=C1N(CCCCCCCC)C(=O)c2c3c(c(NCCNCCN(C)C)ccc13)ccc2	7.03555	-122724	-1.01154e+06	-55.7611	-8.58129	8.58129	-1.17099	77.1021	837.84	648.434	177.985	726.196	111.645	0	0	3	4	4	0	10	0	70	2	6	32	24	97.4171	1.39167	0	0	26	0	0	38	0	4	2	0	0	1.49051	-2.69996	-0.533514	0.593098	2.63986	-2.82286	-0.424512	0.668472	2.78962
0	O=C1N(C)C(=O)c2c3c(c(NCCNCCN(C)C)ccc13)ccc2	7.30188	-97569.9	-701656	-9.07116	-8.57564	8.57564	-1.18365	55.447	629.658	480.703	138.564	526.739	102.919	0	0	2	3	4	0	10	0	49	2	6	25	17	74.3711	1.51778	0	0	19	0	0	24	0	4	2	0	0	1.53195	-2.65897	-0.533927	0.593551	2.54593	-2.82286	-0.425155	0.668488	2.46495
1	FC(F)(F)c1cc(C(=O)Nc2cc(N3C(=O)N(C)c4nc(N)ncc4C3)c(C)cc2)ccc1	0.864339	-147933	-1.09006e+06	-92.3611	-8.84295	8.84295	-0.85812	61.2641	698.477	399.926	298.551	421.378	277.099	0	0	3	4	4	0	18	0	52	2	6	33	21	95.3401	1.83346	0	0	22	0	3	19	0	6	2	0	0	1.37063	-2.52467	-0.574691	0.616434	2.49258	-2.59671	-0.469922	0.705749	2.54672
1	Clc1c(Nc2c(S(=O)(=O)C(C)C)cccc2)nc(Nc2c(OC)cc(N3CCC(N4CCN(C)CC4)CC3)cc2)nc1	6.0731	-169890	-1.60038e+06	27.2785	-8.4709	8.4709	-0.82993	94.6577	922.168	659.043	263.125	774.809	147.359	0	0	3	4	7	0	18	0	82	2	9	42	29	136.829	1.66865	0	0	30	1	0	40	0	7	3	0	1	1.10183	-2.84674	-0.521734	0.593436	2.75505	-2.93434	-0.427912	0.677978	2.71413
1	FC(F)(F)c1c(NC(=O)C=C)ccc(C(=O)Nc2cc(Nc3nc(-c4cnccc4)ccn3)c(C)cc2)c1	2.82624	-163309	-1.32481e+06	-53.5056	-8.35134	8.35134	-0.73573	71.3977	781.361	406.11	369.83	532.634	248.727	0	0	3	5	5	0	24	0	59	3	8	38	27	104.191	1.76594	0	0	27	0	3	21	0	6	2	0	0	1.28027	-2.35403	-0.615174	0.654082	2.39584	-2.33071	-0.536474	0.723807	2.49709
1	Clc1c(NC(=O)Nc2noc(C)c2)ccc(Oc2c3c(ncc2)cc(OC)c(OC)c3)c1	6.96155	-135518	-985077	-1.26404	-8.69879	8.69879	-0.49909	61.9791	752.89	470.417	277.153	626.524	126.366	0	0	3	4	5	0	21	0	51	2	7	32	20	90.8659	1.78168	0	0	22	1	0	19	0	4	5	0	0	1.24554	-2.2977	-0.615587	0.589055	2.28941	-2.39752	-0.484281	0.761672	2.47809
1	FC(F)(F)c1c(CN2CCN(C)CC2)ccc(NC(=O)c2cc(C#Cc3n4N=CC=Cc4nc3)c(C)cc2)c1	2.47598	-163670	-1.3472e+06	40.0095	-8.68257	8.68257	-0.98262	78.1164	851.095	535.063	316.032	663.377	187.718	0	0	3	4	5	0	17	0	66	1	6	39	29	109.402	1.65761	0	0	29	0	3	27	0	6	1	0	0	1.10211	-2.7713	-0.491097	0.571533	2.66179	-2.87102	-0.435402	0.612019	2.61053
1	Clc1c(NC(=O)Nc2c(F)cc(F)cc2)ccc(Oc2c3c(ncc2)cc(OC)c(OC)c3)c1	2.84077	-151375	-1.08141e+06	-107.538	-8.75494	8.75494	-0.62745	64.0443	763.093	458.033	299.18	680.509	82.5835	0	0	3	4	4	0	22	0	52	2	6	34	26	96.5702	1.85712	0	0	24	1	2	18	0	3	4	0	0	1.24067	-2.30612	-0.655439	0.685947	2.27745	-2.40277	-0.508963	0.802417	2.47814
1	Fc1cc(F)cc(C(c2[nH]c(C)cn2)=C2C(=O)Nc3c2cc(NC2CCN(CC)CC2)cc3)c1	6.96979	-138907	-1181922	10.5795	-8.24192	8.24192	-1.02602	71.1794	707.474	460.078	247.396	580.828	126.647	0	0	4	5	4	0	17	0	61	4	8	34	26	97.5719	1.59954	0	0	26	0	2	27	0	5	1	0	0	1.30577	-2.7981	-0.591724	0.588832	2.71523	-2.84519	-0.475112	0.78271	2.69766
1	Clc1ccc(C(c2[nH]ccn2)=C2C(=O)Nc3c2cc(NC2CCN(CC)CC2)cc3)cc1	5.69624	-121876	-1.04122e+06	106.757	-8.16091	8.16091	-0.94719	69.8186	721.896	462.287	259.609	570.072	151.824	0	0	4	5	4	0	17	0	58	4	8	32	24	89.8454	1.54906	0	0	25	1	0	26	0	5	1	0	0	1.26978	-2.7981	-0.592518	0.65264	2.71523	-2.84519	-0.53808	0.805915	2.69766
1	O=C1C(=C(c2[nH]c3c(n2)cccc3)c2ccccc2)c2c(N1)ccc(NC1CCN(CC)CC1)c2	3.80507	-126015	-1.16209e+06	122.201	-8.19603	8.19603	-1.06382	76.679	724.183	478.979	245.204	604.085	120.098	0	0	4	5	4	0	21	0	64	4	8	35	27	90.6275	1.41605	0	0	29	0	0	29	0	5	1	0	0	1.169	-2.7981	-0.633663	0.639706	2.71523	-2.84519	-0.53808	0.729261	2.69766
1	O=C(Nc1c(C)nn(C)c1)Cc1c(OC)cc(Oc2c3c(ncc2)cc(OC)cc3)cc1	6.15172	-127033	-1.00619e+06	10.5664	-8.69064	8.69064	-0.62524	65.851	746.721	547.024	194.764	653.147	93.5733	0	0	3	4	5	0	21	0	56	1	6	32	23	89.1337	1.59167	0	0	24	0	0	24	0	4	4	0	0	1.25326	-2.36219	-0.568914	0.535462	2.39755	-2.42481	-0.540832	0.636179	2.47789
1	Fc1c(NC(=O)c2n3c(nc2)C=C(c2n(C)ncc2)C=C3)cc(C(=O)NCCN(C(C)(C)C)C)cc1	3.40951	-145557	-1.18818e+06	74.9402	-8.85665	8.85665	-0.87285	75.6248	816.033	544.501	271.532	646.78	169.253	0	0	3	4	5	0	16	0	66	2	7	36	24	107.86	1.63425	0	0	26	0	1	30	0	7	2	0	0	1.24236	-2.74644	-0.532597	0.548557	2.65169	-2.8192	-0.465661	0.583543	2.65318
1	O=C(Nc1cc(C)ccc1)Nc1ccc(Oc2c3c(ncc2)cc(OC)c(OC)c3)cc1	5.5372	-124924	-949999	-19.0622	-8.62661	8.62661	-0.39087	65.8442	755.586	520.673	230.094	662.035	93.5507	0	0	3	4	4	0	22	0	55	2	6	32	24	85.0816	1.54694	0	0	25	0	0	23	0	3	4	0	0	1.19911	-2.34146	-0.595713	0.645844	2.27894	-2.40449	-0.53808	0.75205	2.47399
1	Fc1c(NC(=O)Nc2ccc(Oc3c4c(ncc3)cc(OC)c(OC)c4)cc2)ccc(F)c1	3.83034	-143072	-1.01873e+06	-101.008	-8.68295	8.68295	-0.48572	62.5311	740.663	478.43	256.205	647.254	93.4096	0	0	3	4	4	0	22	0	52	2	6	33	25	90.9183	1.74843	0	0	24	0	2	19	0	3	4	0	0	1.19984	-2.31129	-0.638731	0.686215	2.27324	-2.40445	-0.53808	0.802415	2.47388
1	Fc1c(NC(=O)Nc2ccc(Oc3c4c(ncc3)cc(OC)c(OC)c4)cc2)c(F)ccc1	5.30631	-143068	-1.03383e+06	-97.8315	-8.62212	8.62212	-0.44709	62.5311	749.354	481.61	262.285	654.519	94.8348	0	0	3	4	4	0	22	0	52	2	6	33	25	90.9183	1.74843	0	0	24	0	2	19	0	3	4	0	0	1.21415	-2.30833	-0.638731	0.65556	2.27733	-2.40576	-0.53808	0.795118	2.47388
1	Fc1c(Oc2c3c(ncc2)cc(OCCCN2CCOCC2)c(OC)c3)ccc(NC(=O)C2(C(=O)Nc3ccc(F)cc3)CC2)c1	4.58418	-196899	-1.6887e+06	-157.319	-8.56396	8.56396	-0.47645	92.837	1010.84	679.737	326.188	872.463	138.377	0	0	3	4	7	0	22	0	80	2	9	46	34	134.297	1.67871	0	0	34	0	2	34	0	4	6	0	0	0.935576	-2.73102	-0.630485	0.628436	2.84294	-2.83113	-0.531073	0.76966	2.84813
1	O=C(Nc1ccc(Oc2c3c(ncc2)cc(OC)c(OC)c3)cc1)Nc1ccccc1	5.29943	-121330	-904805	-11.596	-8.63572	8.63572	-0.3853	62.7507	731.828	496.036	230.372	638.166	93.6622	0	0	3	4	4	0	22	0	52	2	6	31	23	81.3902	1.5652	0	0	24	0	0	21	0	3	4	0	0	1.20345	-2.31967	-0.638731	0.690406	2.2683	-2.40267	-0.53808	0.793958	2.4739
1	O=C(Nc1ccc(OC)cc1)Nc1ccc(Oc2ncnc3c2cc(OC)c(OC)c3)cc1	1.48954	-133800	-997073	-37.0765	-8.45453	8.45453	-0.69155	65.3194	771.987	557.823	208.657	627.882	144.105	0	0	3	4	6	0	22	0	55	2	8	33	21	90.2186	1.64034	0	0	24	0	0	22	0	4	5	0	0	1.17862	-2.3251	-0.616342	0.561473	2.26904	-2.40317	-0.53808	0.711457	2.45617
1	O=C(Nc1c(C)cccc1)Nc1ccc(Oc2c3c(ncc2)cc(OC)c(OC)c3)cc1	5.49005	-124924	-956069	-18.562	-8.62764	8.62764	-0.38817	65.8442	753.593	512.863	235.322	670.853	82.74	0	0	3	4	4	0	22	0	55	2	6	32	24	85.0816	1.54694	0	0	25	0	0	23	0	3	4	0	0	1.20686	-2.35391	-0.595713	0.595325	2.29297	-2.409	-0.53808	0.724681	2.47411
1	Fc1c(NC(=O)Nc2ccc(Oc3c4c(ncc3)cc(OC)c(OC)c4)cc2)cccc1	4.02753	-132202	-964174	-57.0248	-8.65386	8.65386	-0.42186	62.6409	737.53	490.326	241.604	646.601	90.9288	0	0	3	4	4	0	22	0	52	2	6	32	24	87.1903	1.67674	0	0	24	0	1	20	0	3	4	0	0	1.20686	-2.31307	-0.638731	0.680273	2.27098	-2.40419	-0.53808	0.79405	2.47389
1	O=C(N(C)c1ccc(N=C(c2ccccc2)C2C(=O)Nc3c2ccc(C(=O)OC)c3)cc1)CN1CCN(C)CC1	3.76605	-155365	-1.415e+06	-7.8882	-8.59908	8.59908	-0.58163	85.2722	874.122	634.47	239.652	733.259	140.863	0	0	3	4	6	0	18	0	73	1	7	40	27	112.202	1.53702	0	0	31	0	0	33	0	5	4	0	0	1.16848	-2.76757	-0.553402	0.577484	2.66908	-2.89641	-0.476655	0.686255	2.54344
1	O=C(NC(=O)c1c(C)cccc1)Nc1ccc(Oc2c3c(ncc2)cc(OC)c(OC)c3)cc1	7.96088	-135262	-1.04056e+06	-50.4279	-8.65265	8.65265	-0.32313	68.4062	786.716	518.167	262.922	663.399	123.316	0	0	3	4	5	0	22	0	57	2	7	34	24	89.8568	1.57644	0	0	26	0	0	23	0	3	5	0	0	1.19494	-2.32208	-0.610052	0.62107	2.31124	-2.52587	-0.547073	0.717345	2.47374
1	Clc1c(C(=O)Nc2cncnc2)c2onc(Nc3cc(C(F)(F)F)ccc3)c2cc1	6.31518	-140324	-910889	-41.692	-9.40214	9.40214	-1.44493	51.7297	627.76	291.146	330.594	388.302	239.458	0	0	3	4	4	0	21	0	41	2	6	30	19	82.5307	2.01294	0	0	19	1	3	11	0	5	2	0	0	1.35536	-2.26426	-0.633427	0.633485	2.36136	-2.28589	-0.527919	0.810639	2.48691
1	O=C(Nc1c(C)ccc(OC2=Nn3c(nc(NC(=O)C4CC4)c3)C=C2)c1)c1n(C)nc(C)c1	2.22931	-130617	-1011090	147.999	-8.90282	8.90282	-0.64093	65.9222	778.776	481.424	297.352	576.694	202.083	0	0	3	5	5	0	16	0	56	2	7	33	18	92.7217	1.65574	0	0	23	0	0	23	0	7	3	0	0	1.0829	-2.33929	-0.630849	0.611223	2.77101	-2.35841	-0.569307	0.665241	2.84143
1	Fc1c(Oc2c3c(ncc2)cc(OCCCN2CCN(C)CC2)c(OC)c3)ccc(NC(=O)C=2C(=O)N(c3ccc(F)cc3)c3ncccc3C=2)c1	6.18863	-214430	-1.95481e+06	-61.0524	-8.47954	8.47954	-1.5589	104.369	1106.97	776.767	324.818	1007.71	99.2626	0	0	3	4	8	0	28	0	88	1	9	52	38	147.063	1.67117	0	0	39	0	2	36	0	6	5	0	0	0.877574	-2.78713	-0.637712	0.657434	2.67877	-2.89711	-0.51711	0.789699	2.5911
1	O=C(OC)c1cc2NC(=O)/C(=C(\Nc3cc4c([nH]c(C(=O)N5CCN(C)CC5)c4)cc3)/c3ccccc3)/c2cc1	5.33232	-154089	-1.3637e+06	9.16533	-8.23736	8.23736	-0.74984	82.605	848.787	603.149	240.625	672.043	176.744	0	0	3	4	4	0	21	0	69	3	7	40	28	107.417	1.55677	0	0	31	0	0	29	0	5	4	0	0	1.10016	-2.74235	-0.599177	0.645125	2.64957	-2.87088	-0.500721	0.742107	2.52411
1	Fc1c(NC(=O)Nc2ccc(Oc3c4c(ncc3)cc(OC)c(OC)c4)cc2)cc(F)cc1	4.89093	-143071	-1.02114e+06	-101.121	-8.68081	8.68081	-0.48425	62.5311	743.128	480.459	257.203	651.055	92.0728	0	0	3	4	4	0	22	0	52	2	6	33	25	90.9183	1.74843	0	0	24	0	2	19	0	3	4	0	0	1.20659	-2.3106	-0.638731	0.662047	2.27385	-2.40463	-0.53808	0.794093	2.47388
1	Fc1c(C(c2[nH]c(C)cn2)=C2C(=O)Nc3c2cc(NC2CCN(CC)CC2)cc3)cccc1	5.89007	-128034	-1.11416e+06	57.4749	-8.13701	8.13701	-0.78295	71.2892	721.844	491.661	230.183	600.184	121.66	0	0	4	5	4	0	17	0	61	4	8	33	25	93.348	1.53029	0	0	26	0	1	28	0	5	1	0	0	1.3015	-2.7981	-0.526496	0.588838	2.71523	-2.84519	-0.488612	0.682266	2.69766
1	Clc1c(C(=O)NC(=S)Nc2ccc(Oc3c4c(ncc3)cc(OC)c(OC)c4)cc2)cccc1	6.25715	-137061	-1.04185e+06	-0.9305	-8.67493	8.67493	-0.99502	68.9239	796.338	472.252	318.536	654.37	141.968	0	0	3	5	5	0	22	0	54	2	7	34	24	95.4741	1.76804	0	0	25	1	0	20	0	3	4	0	1	1.19494	-2.32782	-0.647675	0.683384	2.26616	-2.52057	-0.547073	0.789253	2.47375
1	O=C(Oc1ccccc1)Nc1ccc(Oc2c3c(ncc2)cc(OC)c(OC)c3)cc1	3.63491	-123626	-909507	-35.5752	-8.68716	8.68716	-0.45868	61.7859	733.359	494.826	233.556	645.7	87.6588	0	0	3	4	4	0	22	0	51	1	5	31	23	79.2064	1.55307	0	0	24	0	0	20	0	2	5	0	0	1.20345	-2.29604	-0.640346	0.690781	2.26555	-2.31097	-0.547073	0.791152	2.47381
1	O=C1C(=C(c2[nH]c3c(n2)cccc3)c2ccc(C)cc2)c2c(N1)ccc(NC1CCN(CC)CC1)c2	3.69761	-129609	-1.23602e+06	115.357	-8.2506	8.2506	-1.18867	79.7726	730.786	481.276	249.51	608.508	122.279	0	0	4	5	4	0	21	0	67	4	8	36	28	94.0315	1.40346	0	0	30	0	0	31	0	5	1	0	0	1.17386	-2.7981	-0.598108	0.618909	2.71523	-2.84519	-0.53808	0.707753	2.69766
1	Clc1c(C#Cc2cc(N3CCOCC3)cnc2)cc(C(=O)Nc2cc(C(F)(F)F)c(CN3CCN(C)CC3)cc2)cc1	0.637937	-182136	-1.52848e+06	-72.1998	-8.92212	8.92212	-1.13576	86.1856	921.767	613.522	308.245	756.641	165.126	0	0	3	4	5	0	18	0	73	1	6	42	34	126.332	1.73058	0	0	31	1	3	31	0	5	2	0	0	1.08083	-2.7713	-0.480937	0.459597	2.66179	-2.87102	-0.417786	0.603187	2.61053
1	Fc1ccc(NC(=O)Nc2ccc(Oc3c4c(ncc3)cc(OC)c(OC)c4)cc2)cc1	5.19604	-132201	-956278	-56.4579	-8.67223	8.67223	-0.41936	62.6409	740.321	486.5	248.686	645.725	94.5957	0	0	3	4	4	0	22	0	52	2	6	32	24	87.1903	1.67674	0	0	24	0	1	20	0	3	4	0	0	1.19182	-2.317	-0.637813	0.690237	2.2691	-2.40291	-0.53808	0.802405	2.4739
1	O=C(Nc1c(OC)cccc1)Nc1ccc(Oc2c3c(ncc2)cc(OC)c(OC)c3)cc1	4.84364	-132304	-1.00748e+06	-49.1248	-8.64901	8.64901	-0.48371	66.6462	773.982	561.371	206.87	686.515	87.4671	0	0	3	4	5	0	22	0	56	2	7	33	24	88.709	1.58409	0	0	25	0	0	23	0	3	5	0	0	1.20618	-2.3335	-0.624392	0.620761	2.2784	-2.40572	-0.556067	0.750318	2.47408
1	FC(F)(F)c1c(NC(=O)/C=C/CN(C)C)ccc(NC(=O)c2cc(Nc3nc(-c4cnccc4)ccn3)c(C)cc2)c1	6.6063	-179162	-1.57055e+06	-50.8974	-8.53854	8.53854	-0.78419	82.4452	821.184	520.986	297.768	608.914	212.27	0	0	3	5	6	0	24	0	70	3	9	42	30	120.831	1.72615	0	0	30	0	3	28	0	7	2	0	0	1.2571	-2.55349	-0.58093	0.640251	2.42706	-2.62932	-0.492266	0.669599	2.51133
1	O=C(NC(=O)c1c(C)cccc1)Nc1ccc(Oc2ncnc3c2cc(OC)c(OC)c3)cc1	7.42858	-136759	-1.04347e+06	-38.8238	-8.74581	8.74581	-0.59832	67.0794	780.153	512.502	262.824	613.054	167.099	0	0	3	4	6	0	22	0	56	2	8	34	21	91.3983	1.63211	0	0	25	0	0	22	0	4	5	0	0	1.19494	-2.32096	-0.595694	0.579893	2.31119	-2.52587	-0.535878	0.68138	2.45586
1	O(C)c1cc2[nH]c(C(c3ccccc3)=C3C(=O)Nc4c3cc(NC3CCN(CC)CC3)cc4)nc2cc1	3.36245	-136985	-1.2733e+06	87.9873	-8.06765	8.06765	-1.00351	80.5746	786.424	554.957	231.467	640.077	146.346	0	0	4	5	5	0	21	0	68	4	9	37	28	99.551	1.46399	0	0	30	0	0	31	0	5	2	0	0	1.16655	-2.7981	-0.610301	0.606814	2.71523	-2.84519	-0.523395	0.684582	2.69766
1	Fc1cc(F)cc(C(c2[nH]c3c(n2)cccc3)=C2C(=O)Nc3c2cc(NC2CCN(CC)CC2)cc3)c1	4.33913	-147753	-1.2839e+06	35.8329	-8.30063	8.30063	-1.14162	76.4594	769.74	475.834	293.906	644.795	124.945	0	0	4	5	4	0	21	0	64	4	8	37	29	101.127	1.58011	0	0	29	0	2	27	0	5	1	0	0	1.19578	-2.7981	-0.647308	0.634569	2.71523	-2.84519	-0.488167	0.797153	2.69766
1	O=C(NCCC1CCCCC1)Nc1ccc(Oc2c3c(ncc2)cc(OC)c(OC)c3)cc1	6.2311	-130465	-1.03447e+06	-83.1069	-8.59177	8.59177	-0.31597	72.9386	803.323	621.771	176.549	705.323	98.0003	0	0	3	4	4	0	16	0	64	2	6	33	25	95.4536	1.49146	0	0	26	0	0	31	0	3	4	0	0	1.14673	-2.81907	-0.595713	0.585256	2.75383	-2.73414	-0.53808	0.68187	2.89268
1	Fc1cc(C(c2[nH]ccn2)=C2C(=O)Nc3c2cc(NC2CCN(CC)CC2)cc3)ccc1	4.33519	-124444	-1.05064e+06	61.3576	-8.23472	8.23472	-1.01269	68.1956	682.464	449.156	233.308	533.649	148.815	0	0	4	5	4	0	17	0	58	4	8	32	24	89.8454	1.54906	0	0	25	0	1	26	0	5	1	0	0	1.27952	-2.7981	-0.592382	0.65365	2.71523	-2.84519	-0.515772	0.746074	2.69766
1	O=C(Nc1noc(C(C)(C)C)c1)Nc1ccc(NC(=O)c2ncc(OC3CCN(CC)CC3)cc2)cc1	2.66485	-148626	-1.20133e+06	-0.74831	-8.24336	8.24336	-0.50223	79.999	889.949	601.452	288.497	653.199	236.75	0	0	3	5	6	0	17	0	71	3	9	37	23	111.767	1.57418	0	0	27	0	0	34	0	6	4	0	0	1.072	-2.77816	-0.48176	0.592334	2.71486	-2.82887	-0.396843	0.670516	2.68918
1	Fc1cc(NC(=O)Nc2ccc(Oc3c4c(ncc3)cc(OC)c(OC)c4)cc2)ccc1	3.812	-132201	-957247	-56.5666	-8.67817	8.67817	-0.42761	62.6409	738.745	486.868	247.31	643.787	94.9585	0	0	3	4	4	0	22	0	52	2	6	32	24	87.1903	1.67674	0	0	24	0	1	20	0	3	4	0	0	1.19911	-2.31619	-0.638731	0.684393	2.26943	-2.40309	-0.53808	0.794091	2.4739
1	O=C(OC)c1cc2NC(=O)/C(=C(\Nc3ccc(-n4c(CN(C)C)ccc4)cc3)/c3ccccc3)/c2cc1	3.19412	-138638	-1.21826e+06	57.7856	-8.36583	8.36583	-1.01864	78.2762	809.095	562.221	246.874	666.753	142.342	0	0	2	3	3	0	23	0	65	2	5	37	28	96.8864	1.49056	0	0	30	0	0	28	0	4	3	0	0	1.22435	-2.5499	-0.618849	0.671784	2.44278	-2.56921	-0.51933	0.774152	2.49938
1	Fc1c(F)ccc(NC(=O)Nc2ccc(Oc3c4c(ncc3)cc(OC)c(OC)c4)cc2)c1	4.3144	-143070	-1.01411e+06	-99.2221	-8.70782	8.70782	-0.51357	62.5311	744.984	478.437	261.642	649.163	95.8208	0	0	3	4	4	0	22	0	52	2	6	33	25	90.9183	1.74843	0	0	24	0	2	19	0	3	4	0	0	1.19273	-2.31427	-0.638731	0.689572	2.27118	-2.40336	-0.53808	0.803097	2.47389
1	O=[N+]([O-])c1c(NC(=O)Nc2ccc(Oc3c4c(ncc3)cc(OC)c(OC)c4)cc2)cccc1	2.90456	-140492	-1.05843e+06	-9.41056	-8.70357	8.70357	-1.21174	64.7879	756.286	474.409	276.738	599.327	156.959	0	0	3	4	4	0	22	0	54	2	6	34	24	90.7765	1.68105	0	0	24	0	0	20	0	4	6	0	0	1.20993	-2.30983	-0.610053	0.629035	2.30002	-2.40256	-0.547073	0.747754	2.47401
1	Fc1cc(C(c2[nH]c3c(n2)cccc3)=C2C(=O)Nc3c2cc(NC2CCN(CC)CC2)cc3)ccc1	3.28901	-136886	-1.23605e+06	76.6401	-8.361	8.361	-1.23255	76.5692	722.53	457.207	265.323	600.607	121.923	0	0	4	5	4	0	21	0	64	4	8	36	28	96.903	1.51411	0	0	29	0	1	28	0	5	1	0	0	1.18165	-2.7981	-0.632278	0.634118	2.71523	-2.84519	-0.514553	0.740379	2.69766
1	O(C)c1ccc(C(c2[nH]c3c(n2)cccc3)=C2C(=O)Nc3c2cc(NC2CCN(CC)CC2)cc3)cc1	4.06494	-136988	-1306301	130.932	-8.24464	8.24464	-1.15478	80.5746	741.491	505.661	235.83	617.147	124.344	0	0	4	5	5	0	21	0	68	4	9	37	28	99.551	1.46399	0	0	30	0	0	31	0	5	2	0	0	1.17306	-2.7981	-0.606375	0.612571	2.71523	-2.84519	-0.522045	0.695545	2.69766
1	O=C(Nc1ccc(Oc2ncnc3c2cc(OC)c(OC)c3)cc1)NC1CCCCC1	4.69965	-124775	-957128	-58.135	-8.67957	8.67957	-0.55163	65.4246	749.536	570.739	173.268	611.84	137.696	0	0	3	4	5	0	16	0	57	2	7	31	20	90.2214	1.58283	0	0	23	0	0	26	0	4	4	0	0	1.20312	-2.78433	-0.593539	0.583226	2.72972	-2.77604	-0.534552	0.686965	2.83214
1	O=C(N(CCCN(C)C)c1ccc(N=C(c2ccccc2)C2C(=O)Nc3c2ccc(C(=O)OC)c3)cc1)C	6.71428	-147333	-1.32295e+06	-28.0785	-8.68851	8.68851	-0.55068	81.7454	836.627	575.097	261.53	691.359	145.268	0	0	3	4	5	0	18	0	70	1	6	38	26	105.843	1.51204	0	0	30	0	0	32	0	4	4	0	0	1.38555	-2.65479	-0.553246	0.577572	2.56934	-2.71801	-0.476028	0.686727	2.54644
1	Fc1ccc(NC(=O)CC(=O)Nc2cc3NC(=O)/C(=C\c4[nH]ccc4)/c3cc2)cc1	4.6041	-122738	-857122	-20.5262	-8.1017	8.1017	-0.79852	57.4185	673.836	346.813	327.023	476.093	197.743	0	0	3	5	3	0	17	0	47	4	7	30	20	80.7164	1.71737	0	0	22	0	1	17	0	4	3	0	0	1.18288	-2.34816	-0.634523	0.668564	2.41772	-2.46954	-0.588938	0.794813	2.47858
1	O=C(Nc1cc(C)c(N2CCOCC2)cc1)Nc1ccc(-c2c3c(C)n[nH]c3ncc2)cc1	4.07755	-125410	-998862	84.114	-8.72047	8.72047	-0.49932	69.5406	742.24	519.745	217.078	577.802	164.438	0	0	4	5	5	0	21	0	59	5	10	33	23	91.2583	1.54675	0	0	25	0	0	26	0	6	2	0	0	1.03387	-2.66829	-0.526814	0.60628	2.60067	-2.78204	-0.43187	0.69622	2.54
1	O=C(Nc1noc(C(C)(C)C)c1)Nc1ccc(NC(=O)c2ncc(OC3CC(C)(C)N(CC)C(C)(C)C3)cc2)cc1	2.58424	-162978	-1.45858e+06	-5.73155	-8.23426	8.23426	-0.48224	92.3733	942.621	604.638	337.983	649.165	293.456	0	0	3	5	6	0	17	0	83	3	9	41	27	125.561	1.51278	0	0	31	0	0	42	0	6	4	0	0	1.11434	-2.88636	-0.414065	0.431219	2.82485	-2.91874	-0.336301	0.575321	2.81847
1	O=C(C=C)N1Cc2c(cc(C(=O)Nc3cc(Nc4nc(-c5cnccc5)ccn4)c(C)cc3)cc2)CC1	3.60016	-137220	-1.20343e+06	101.503	-8.52311	8.52311	-0.56982	76.5806	778.34	491.716	282.589	619.352	158.988	0	0	3	4	5	0	24	0	63	2	7	37	26	95.966	1.52327	0	0	29	0	0	26	0	6	2	0	0	1.07615	-2.6209	-0.618412	0.647849	2.56071	-2.64363	-0.557577	0.696459	2.58761
1	O=C(N(C)c1ccc(N=C(c2ccccc2)C2C(=O)Nc3c2ccc(C(=O)OC)c3)cc1)Cn1cncc1	5.16656	-146882	-1.26523e+06	41.709	-8.846	8.846	-0.62816	76.4178	809.831	537.847	271.984	632.998	176.833	0	0	3	4	5	0	23	0	63	1	6	38	24	99.9811	1.587	0	0	29	0	0	25	0	5	4	0	0	1.19099	-2.4344	-0.642616	0.700833	2.51719	-2.5171	-0.53808	0.775678	2.53033
1	S=C(NC(=O)c1ccccc1)Nc1ccc(Oc2c3c(ncc2)cc(OC)c(OC)c3)cc1	5.9167	-128759	-983000	3.8187	-8.67455	8.67455	-0.98224	67.4107	777.197	485.378	286.824	628.446	148.751	0	0	3	5	5	0	22	0	54	2	7	33	23	89.674	1.66063	0	0	25	0	0	21	0	3	4	0	1	1.19013	-2.32942	-0.64244	0.688739	2.26559	-2.52149	-0.547073	0.789217	2.47375
1	FC(F)(F)c1cc(C(=O)Nc2cc(c(C)cc2)C2=Cn3c(nc(NC(=O)C)c3)C=C2)ccc1	0							62.5841	725.505	352.462	373.043	479.332	246.174	0	0	2	3	3	0	17	0	52	2	5	33	23	90.9183	1.74843	0	0	24	0	3	19	0	4	2	0	0	1.29609	-2.35655	-0.574751	0.616455	2.36671	-2.34455	-0.541711	0.672227	2.48254
1	O=C(N(CCN(C)C)c1ccc(N=C(c2ccccc2)C2C(=O)Nc3c2ccc(C(=O)OC)c3)cc1)C	5.20064	-143739	-1271020	-21.1376	-8.69618	8.69618	-0.58323	78.6518	797.267	547.676	249.59	652.41	144.856	0	0	3	4	5	0	18	0	67	1	6	37	25	102.34	1.52746	0	0	29	0	0	30	0	4	4	0	0	1.40399	-2.62728	-0.553302	0.577573	2.53207	-2.74213	-0.476112	0.686841	2.53069
1	O=C(Nc1cc(C)cc(-n2cc(C)nc2)c1)c1cc(Nc2nc(-c3cnccc3)ccn2)c(C)cc1	5.56949	-131319	-1168835	186.313	-8.65421	8.65421	-0.86967	74.4518	736.711	456.278	277.105	632.244	104.467	0	0	3	4	5	0	29	0	61	2	7	36	25	91.4211	1.49871	0	0	28	0	0	25	0	7	1	0	0	1.11231	-2.35281	-0.58093	0.653884	2.31714	-2.31662	-0.492266	0.687568	2.44958
1	O=C(N(C)C)CN(C(=O)C)c1ccc(N=C(c2ccccc2)C2C(=O)Nc3c2ccc(C(=O)OC)c3)cc1	7.99398	-150490	-1.31825e+06	-41.6293	-9.03424	9.03424	-0.56772	78.1202	823.221	550.426	272.794	653.679	169.541	0	0	3	5	5	0	18	0	66	1	6	38	24	103.833	1.57323	0	0	29	0	0	28	0	4	5	0	0	1.40956	-2.51607	-0.582016	0.617816	2.51734	-2.66774	-0.496734	0.661545	2.53032
1	O=C(NCCC1CCCCC1)Nc1ccc(Oc2ncnc3c2cc(OC)c(OC)c3)cc1	4.57088	-131962	-1.0389e+06	-71.7553	-8.74408	8.74408	-0.55241	71.6118	811.39	625.035	180.94	666.856	144.533	0	0	3	4	5	0	16	0	63	2	7	33	22	97.2655	1.5439	0	0	25	0	0	30	0	4	4	0	0	1.14673	-2.81907	-0.576774	0.569348	2.75383	-2.73414	-0.533768	0.668867	2.89268
1	FC(F)(F)c1cc(N2C(=O)C(c3cc4c(nc(N)nc4)cc3)=C(C)C=C2)ccc1	3.25379	-126773	-871002	-58.5051	-8.41403	8.41403	-0.9053	53.8349	614.922	312.765	297.193	372.226	242.696	0	0	2	2	3	0	16	0	44	1	4	29	22	76.6181	1.74132	0	0	21	0	3	15	0	4	1	0	0	1.43044	-2.40039	-0.557831	0.609851	2.3965	-2.37774	-0.462862	0.717471	2.50452
1	O=C1C(c2[nH]c3c(n2)cccc3)=C(NC2CCC(N)CC2)C=CN1	4.82352	-91050.6	-680845	40.1573	-8.15423	8.15423	-0.51037	51.9847	567.136	374.26	192.876	417.398	149.738	0	0	3	4	5	0	9	0	45	6	11	24	16	68.2264	1.51614	0	0	18	0	0	21	0	5	1	0	0	1.40607	-2.80256	-0.550201	0.623995	2.74511	-2.84855	-0.508645	0.675094	2.78405
1	O=C(Nc1noc(C(C)(C)C)c1)Nc1ccc(NC(=O)c2ncc(OC3CC(C)(C)N(C)C(C)(C)C3)cc2)cc1	3.34622	-159387	-1.39875e+06	-1.75381	-8.23974	8.23974	-0.47263	89.2797	922.698	604.304	318.394	646.771	275.927	0	0	3	5	6	0	17	0	80	3	9	40	26	122.161	1.52701	0	0	30	0	0	40	0	6	4	0	0	1.10974	-2.87789	-0.414344	0.431296	2.81835	-2.91042	-0.336686	0.575717	2.81231
1	Clc1c(NC(=O)c2sc(Nc3nc(C)nc(N4CCN(CCO)CC4)c3)nc2)c(C)ccc1	4.11779	-134455	-1.0994e+06	48.4983	-9.15209	9.15209	-1.04011	70.4406	788.074	522.099	265.975	608.731	179.343	0	0	3	4	6	0	17	0	59	3	9	33	19	105.106	1.78145	0	0	22	1	0	26	0	7	2	0	1	1.22703	-2.75622	-0.58014	0.611262	2.66569	-2.88973	-0.449113	0.666388	2.54925
1	Clc1c(F)c(Nc2ncnc3c2cc(NC(=O)[C@H]2N(C(=O)C=C)CCC2)c(OCCOC)c3)ccc1	7.66434	-154927	-1290236	-77.9796	-8.43827	8.43827	-0.66968	72.1148	780.714	489.349	286.401	626.976	153.738	0	0	3	4	6	0	16	0	61	2	8	36	23	109.973	1.80283	0	0	25	1	1	25	0	5	4	0	0	1.44298	-2.47982	-0.613108	0.596974	2.7165	-2.63581	-0.480551	0.697875	2.68783
1	Clc1c(F)c(Nc2ncnc3c2cc(NC(=O)[C@H]2N(C(=O)C=C)CCC2)c(OCCOC)c3)ccc1F	8.7152	-165795	-1352619	-120.077	-8.49738	8.49738	-0.77327	72.005	791.215	487.956	297.862	632.617	158.598	0	0	3	4	6	0	16	0	61	2	8	37	24	114.03	1.86934	0	0	25	1	2	24	0	5	4	0	0	1.44403	-2.47982	-0.616194	0.596554	2.7165	-2.63581	-0.474013	0.714216	2.68783
1	Clc1c(NC(=O)Nc2ccc(Oc3c4c(ncc3)cc(OC)c(OC)c4)cc2)c(Cl)ccc1	5.64345	-137934	-1.02141e+06	-21.271	-8.61504	8.61504	-0.42218	65.7771	778.879	459.792	313.308	697.227	81.6518	0	0	3	4	4	0	22	0	52	2	6	33	25	90.9183	1.74843	0	0	24	2	0	19	0	3	4	0	0	1.21415	-2.31244	-0.638731	0.672692	2.27115	-2.39923	-0.53808	0.797514	2.47405
1	O(CCN1CCC(Nc2cc3C(=C(c4[nH]c5c(n4)cccc5)c4ccccc4)C(=O)Nc3cc2)CC1)C	0							80.5746	768.229	537.236	230.993	663.707	104.522	0	0	4	5	5	0	21	0	68	4	9	37	28	99.551	1.46399	0	0	30	0	0	31	0	5	2	0	0	1.12532	-2.79756	-0.597952	0.622748	2.71983	-2.85705	-0.521477	0.710031	2.69375
1	Clc1ccc(NC(=O)Nc2ccc(Oc3c4c(ncc3)cc(OC)c(OC)c4)cc2)cc1	5.13979	-129634	-951563	-18.3718	-8.66333	8.66333	-0.45419	64.2639	759.057	477.211	276.672	662.681	96.3755	0	0	3	4	4	0	22	0	52	2	6	32	24	87.1903	1.67674	0	0	24	1	0	20	0	3	4	0	0	1.19182	-2.31809	-0.638731	0.690286	2.26867	-2.40239	-0.53808	0.805915	2.47392
1	Fc1cc(F)cc(NC(=O)Nc2ccc(Oc3c4c(ncc3)cc(OC)c(OC)c4)cc2)c1	5.03616	-143071	-1.01617e+06	-100.512	-8.70012	8.70012	-0.48606	62.5311	744.234	477.744	261.31	649.458	94.7762	0	0	3	4	4	0	22	0	52	2	6	33	25	90.9183	1.74843	0	0	24	0	2	19	0	3	4	0	0	1.19945	-2.31341	-0.638731	0.654066	2.27151	-2.40353	-0.53808	0.805915	2.47389
1	O=C(Nc1cc(Nc2nc(-c3cnccc3)ccn2)c(C)cc1)c1ccc(CN2C(=O)C=CC2=O)cc1	3.0764	-140364	-1.18772e+06	89.8056	-8.54447	8.54447	-1.21141	72.9554	783.784	464.81	315.115	604.433	179.351	0	0	3	5	6	0	24	0	59	2	8	37	24	94.0978	1.59488	0	0	28	0	0	22	0	6	3	0	0	1.04674	-2.387	-0.625589	0.686752	2.43834	-2.40454	-0.559572	0.787475	2.47041
1	O=C(OC)c1cc2NC(=O)C(C(=Nc3ccc(C(=O)N(CCN(C)C)C)cc3)c3ccccc3)c2cc1	5.75032	-143738	-1.29204e+06	-19.8461	-9.17178	9.17178	-0.67982	78.6518	777.644	549.777	227.868	631.23	146.414	0	0	3	4	5	0	18	0	67	1	6	37	25	102.34	1.52746	0	0	29	0	0	30	0	4	4	0	0	1.37413	-2.64038	-0.546422	0.575679	2.53702	-2.75442	-0.472832	0.688664	2.52946
1	Fc1c(NC(=O)c2n(C)nc(C)c2)cc(OC2=Cn3nc(NC(=O)C4CC4)nc3C=C2)cc1	3.01701	-137892	-1.0153e+06	111.954	-8.94088	8.94088	-0.72886	62.7189	763.7	450.585	313.115	570.62	193.08	0	0	3	5	5	0	16	0	53	2	7	33	19	94.6274	1.78542	0	0	22	0	1	20	0	7	3	0	0	1.0829	-2.28081	-0.640575	0.669893	2.77144	-2.35971	-0.606072	0.70068	2.84124
1	S(=O)(=O)(N(CCN(C)C)c1ccc(N=C(c2ccccc2)C2C(=O)Nc3c2ccc(C(=O)OC)c3)cc1)C	5.65082	-152648	-1.36291e+06	-15.9749	-9.1469	9.1469	-0.80585	80.5938	839.067	568.902	270.165	675.2	163.867	0	0	3	5	6	0	18	0	68	1	7	38	25	112.525	1.65478	0	0	28	0	0	30	0	4	5	0	1	1.41692	-2.65174	-0.550167	0.565736	2.57043	-2.76609	-0.482408	0.663295	2.53203
1	O=C(Nc1ccc(Oc2c3c(ncc2)cc(OC)c(OC)c3)cc1)NC1CCCCC1	5.85823	-123278	-954187	-69.8372	-8.60763	8.60763	-0.31767	66.7514	755.753	574.406	175.287	664.67	91.0826	0	0	3	4	4	0	16	0	58	2	6	31	23	88.5869	1.52736	0	0	24	0	0	27	0	3	4	0	0	1.20312	-2.78433	-0.595715	0.625346	2.72972	-2.77604	-0.53808	0.7332	2.83214
1	O=C(N1Cc2c([nH]c(/C=C/3\C(=O)Nc4c\3cc(NC3CCN(C)CC3)cc4)c2)CC1)N1CCOCC1	4.12749	-141273	-1.23491e+06	3.24621	-8.05082	8.05082	-0.81853	79.197	808.244	638.767	169.478	656.21	152.035	0	0	3	4	4	0	11	0	70	3	7	36	25	107.429	1.53471	0	0	27	0	0	34	0	6	3	0	0	1.01175	-2.78657	-0.444578	0.528871	2.70592	-2.835	-0.362348	0.588359	2.6884
1	Clc1c(Oc2c3c(ncc2)cc(OC)c(OC)c3)ccc(NC(=O)Nc2c(F)cc(F)cc2)c1	3.52387	-151373	-1082989	-105.259	-8.70974	8.70974	-0.59896	64.0443	760.879	455.8	299.209	669.829	91.0502	0	0	3	4	4	0	22	0	52	2	6	34	26	96.5702	1.85712	0	0	24	1	2	18	0	3	4	0	0	1.24228	-2.30776	-0.654657	0.68076	2.27653	-2.40401	-0.508949	0.80285	2.48025
1	O=C(NCCCC)c1cc2C(=C(c3[nH]c4c(n3)cccc4)c3ccccc3)C(=O)Nc2cc1	2.12927	-121145	-1.0262e+06	71.9869	-8.82737	8.82737	-1.13644	69.527	745.595	462.293	283.302	590.493	155.101	0	0	4	5	4	0	21	0	57	4	8	33	24	84.0537	1.47463	0	0	27	0	0	24	0	4	2	0	0	1.33471	-2.60033	-0.6395	0.65944	2.53875	-2.64401	-0.554359	0.754699	2.63498
1	Fc1c(NC(=O)c2n3c(nc2)C=CC=C3)cc(C(=O)NCc2c(N3CCN(C)CC3)cccc2)cc1	4.14043	-142813	-1.28283e+06	50.7653	-8.84518	8.84518	-0.52858	74.2844	702.752	418.589	284.163	592.661	110.091	0	0	3	4	4	0	17	0	63	2	6	36	25	102.295	1.62373	0	0	27	0	1	27	0	6	2	0	0	1.10585	-2.74874	-0.570454	0.605753	2.64375	-2.87028	-0.468702	0.701419	2.56285
1	FC(F)(F)c1cc(C(=O)Nc2cc(OC3=Nn4c(ncc4)C=C3)ccc2)ccc1	2.51516	-130518	-866410	-41.2467	-9.02988	9.02988	-0.88896	51.5433	627.516	292.091	335.425	409.942	217.574	0	0	2	3	3	0	17	0	42	1	4	29	20	77.1782	1.83758	0	0	20	0	3	13	0	4	2	0	0	1.23276	-2.29	-0.660529	0.6863	2.365	-2.30135	-0.588264	0.776019	2.46277
1	S(c1c2c(ncc1)cc(OC)c(OC)c2)c1ccc(NC(=O)Nc2ccc(OC)cc2)cc1	2.60834	-129411	-978636	-18.3966	-8.05335	8.05335	-0.64688	68.7442	782.414	543.742	233.483	658.555	123.859	0	0	3	4	5	0	22	0	56	2	7	33	25	92.3187	1.64855	0	0	25	0	0	23	0	3	4	0	1	1.17862	-2.32672	-0.624541	0.649882	2.26914	-2.40334	-0.53808	0.772947	2.48005
1	Fc1c(NC(=O)Nc2ccc(-c3c4c(N)n[nH]c4ccc3)cc2)cc(C)cc1	2.58999	-110096	-780913	62.2722	-8.33713	8.33713	-0.36293	55.8213	640.042	363.762	272.094	467.106	172.936	0	0	3	4	3	0	21	0	46	5	8	28	20	75.1769	1.63428	0	0	21	0	1	18	0	5	1	0	0	1.2309	-2.3334	-0.614921	0.677015	2.29125	-2.40634	-0.482951	0.789783	2.44875
1	S=C(NC(=O)C1CCCCC1)Nc1ccc(Oc2c3c(ncc2)cc(OC)c(OC)c3)cc1	5.58661	-130708	-1.03798e+06	-55.6959	-8.67348	8.67348	-0.88099	71.4114	798.684	563.018	229.674	654.613	144.071	0	0	3	5	5	0	16	0	60	2	7	33	23	97.1802	1.61967	0	0	25	0	0	27	0	3	4	0	1	1.18985	-2.76662	-0.610425	0.58965	2.73713	-2.69954	-0.547073	0.758243	2.85601
1	Fc1c(Oc2c3c(ncc2)cc(OCCCN2CCCC2)c(OC)c3)ccc(NC(=O)C2=NN(c3ccc(F)cc3)C(=O)c3c2cccc3)c1	1.86426	-205748	-1843177	-60.832	-8.54853	8.54853	-1.11745	99.5082	1058.85	684.929	368.669	953.142	105.71	0	0	3	4	7	0	28	0	83	1	8	50	37	138.023	1.66292	0	0	38	0	2	33	0	5	5	0	0	0.894825	-2.62558	-0.654959	0.666913	2.69761	-2.68684	-0.531069	0.800091	2.7107
1	ClCC(=O)Nc1ccc(C(=O)Nc2cc(Nc3nc(-c4cnccc4)ccn3)c(C)cc2)cc1	2.94507	-132463	-1.06856e+06	68.6427	-8.41992	8.41992	-0.46631	68.3867	744.081	428.917	310.055	550.031	194.05	0	0	3	5	5	0	24	0	55	3	8	34	23	92.1299	1.67509	0	0	25	1	0	21	0	6	2	0	0	1.20739	-2.35368	-0.641063	0.660821	2.31539	-2.4044	-0.53808	0.750599	2.46228
1	O=[N+]([O-])c1ccc(NC(=O)Nc2ccc(Oc3c4c(ncc3)cc(OC)c(OC)c4)cc2)cc1	7.39873	-140491	-1.03923e+06	-8.73435	-8.76854	8.76854	-1.12876	64.7879	766.55	477.66	283.476	591.016	175.534	0	0	3	4	4	0	22	0	54	2	6	34	24	90.7765	1.68105	0	0	24	0	0	20	0	4	6	0	0	1.17115	-2.31566	-0.632123	0.695452	2.27737	-2.40265	-0.547073	0.795884	2.47394
1	Fc1c(Oc2c3c(ncc2)cc(OC)c(OC)c3)ccc(NC(=O)Nc2c(F)cc(F)cc2)c1	3.57743	-153940	-1.08918e+06	-143.814	-8.7094	8.7094	-0.63056	62.4213	752.741	473.717	273.308	660.152	92.5889	0	0	3	4	4	0	22	0	52	2	6	34	26	93.8153	1.80414	0	0	24	0	3	18	0	3	4	0	0	1.24228	-2.30525	-0.668725	0.672761	2.28005	-2.40485	-0.508989	0.802838	2.4722
1	O(C)c1cc2[nH]c(C(c3ccccc3)=C3C(=O)Nc4c3cc(OC3CCN(CC)CC3)cc4)nc2cc1	3.18742	-139281	-1.26438e+06	45.3006	-8.36889	8.36889	-1.12873	79.6098	781.813	552.704	229.109	658.891	122.922	0	0	3	4	6	0	21	0	67	3	9	37	28	99.2597	1.48149	0	0	30	0	0	30	0	4	3	0	0	1.16655	-2.7784	-0.637474	0.615727	2.7148	-2.82885	-0.53808	0.702481	2.69035
1	O=[N+]([O-])c1cc(NC(=O)Nc2ccc(Oc3c4c(ncc3)cc(OC)c(OC)c4)cc2)ccc1	3.26271	-140490	-1.04244e+06	-7.43687	-8.74746	8.74746	-1.12021	64.7879	765.091	477.709	282.253	589.287	175.804	0	0	3	4	4	0	22	0	54	2	6	34	24	90.7765	1.68105	0	0	24	0	0	20	0	4	6	0	0	1.18983	-2.3144	-0.610053	0.664079	2.28171	-2.40264	-0.547073	0.76486	2.47395
1	O=C(OCCC1CCCCC1)Nc1ccc(Oc2c3c(ncc2)cc(OC)c(OC)c3)cc1	4.40387	-132769	-1.0395e+06	-134.224	-8.65859	8.65859	-0.4094	71.9738	813.644	628.156	180.766	719.397	94.2466	0	0	3	4	4	0	16	0	63	1	5	33	25	93.5408	1.48478	0	0	26	0	0	30	0	2	5	0	0	1.14673	-2.81437	-0.610051	0.61444	2.75375	-2.68659	-0.547073	0.709647	2.89323
1	S(=O)(=O)(Nc1ccc(C(=O)Nc2cc(Nc3nc(-c4cnccc4)ccn3)c(C)cc2)cc1)C=C	6.91151	-135998	-1136180	85.4498	-8.42985	8.42985	-0.82994	70.5754	740.267	415.586	319.858	545.061	195.205	0	0	3	5	6	0	24	0	57	3	9	35	23	98.0062	1.71941	0	0	25	0	0	22	0	6	3	0	1	1.20924	-2.37468	-0.636824	0.693532	2.34383	-2.42784	-0.587816	0.769039	2.46257
1	Fc1c(Oc2c3c(ncc2)cc(OCCCN2CCN(C)CC2)c(OC)c3)ccc(NC(=O)C=2C(=O)N(c3ccc(F)cc3)c3c(N=2)cccc3)c1	6.21971	-214426	-1.95747e+06	-56.2785	-8.51048	8.51048	-1.51127	104.369	1102.95	756.194	341.263	988.618	114.335	0	0	3	4	8	0	28	0	88	1	9	52	38	147.063	1.67117	0	0	39	0	2	36	0	6	5	0	0	0.877574	-2.78713	-0.63772	0.656901	2.67877	-2.89711	-0.519997	0.787358	2.5911
1	N(c1nn(c(N)n1)-c1nnc2-c3c(cccc3)CCCc2c1)c1cc2c(cc1)CC[C@H](N1CCCC1)CC2	2.88016	-137471	-1240237	190.1	-8.39578	8.39578	-0.87743	84.271	834.375	570.781	261.129	677.875	156.499	0	0	3	4	5	0	23	0	72	2	7	38	27	100.054	1.38964	0	0	30	0	0	34	0	8	0	0	0	0.9098	-2.70503	-0.693059	0.637865	2.74573	-2.73281	-0.631072	0.71942	2.76813
1	O=C1C(=C(c2[nH]ccn2)c2ccccc2)c2c(N1)ccc(NC1CCN(CC)CC1)c2	5.56543	-113571	-991008	128.303	-8.03756	8.03756	-0.8124	68.3054	672.37	462.399	209.972	525.873	146.497	0	0	4	5	4	0	17	0	58	4	8	31	23	83.6749	1.44267	0	0	25	0	0	27	0	5	1	0	0	1.26834	-2.7981	-0.59234	0.660742	2.71523	-2.84519	-0.53808	0.729514	2.69766
1	O=C(N(Cc1ccc(N=C(c2ccccc2)C2C(=O)Nc3c2ccc(C(=O)OC)c3)cc1)C)N(C)C	5.97265	-140148	-1.22327e+06	1.59501	-9.12124	9.12124	-0.64844	75.5582	746.762	522.778	223.984	597.863	148.899	0	0	3	4	4	0	18	0	64	1	5	36	24	98.7881	1.54356	0	0	28	0	0	28	0	4	4	0	0	1.37893	-2.55015	-0.547745	0.576655	2.51729	-2.64123	-0.47335	0.691561	2.53181
1	O=C(Nc1ccc(OC)cc1)Nc1ccc(Nc2c3c(ncc2)cc(OC)c(OC)c3)cc1	2.21183	-130017	-987364	-16.0602	-8.15635	8.15635	-0.51775	67.611	777.34	559.225	212.553	670.547	106.793	0	0	3	4	5	0	22	0	57	3	8	33	24	90.3392	1.5849	0	0	25	0	0	24	0	4	4	0	0	1.17862	-2.34272	-0.610221	0.622275	2.27996	-2.40401	-0.53808	0.742153	2.47516
1	O=C(Nc1cc(CC)ccc1)Nc1ccc(-c2c3c(C)n[nH]c3ncc2)cc1	5.25207	-102811	-766958	107.722	-8.80604	8.80604	-0.43033	59.0247	657.243	422.555	230.109	495.973	161.27	0	0	4	5	4	0	21	0	49	5	9	28	20	73.165	1.49316	0	0	22	0	0	21	0	5	1	0	0	1.21082	-2.42913	-0.58608	0.645006	2.37357	-2.40922	-0.479692	0.752412	2.49261
1	S(=O)(=O)(C)c1ccc(-c2cc3nnc(C(=O)N)c(NC4CCC4)c3cc2)cc1	5.60602	-111086	-825690	9.26381	-9.04093	9.04093	-1.42848	58.2419	638.464	243.75	236.131	417.565	220.899	0	0	2	4	5	0	16	0	48	2	7	28	19	82.4462	1.71763	0	0	20	0	0	20	0	4	3	0	1	1.35561	-2.7948	-0.592913	0.654078	2.73772	-2.75541	-0.50647	0.725184	2.81873
1	O=C(Nc1cnc2c(c1)cccc2)Nc1ccc(-c2c3c(C)n[nH]c3ncc2)cc1	2.23963	-109561	-818236	150.795	-8.80503	8.80503	-0.54655	59.8843	668.603	420.022	237.435	507.291	161.312	0	0	4	4	5	0	25	0	48	5	10	30	21	73.4678	1.53058	0	0	23	0	0	18	0	6	1	0	0	1.05735	-2.31564	-0.598535	0.654818	2.28096	-2.40256	-0.500267	0.753634	2.44262
1	O(C)c1ccc(N(C)c2nc(C)nc3oc(C)cc23)cc1	4.56666	-81663.5	-558181	41.4375	-8.46135	8.46135	-0.33493	44.3995	534.787	380.443	151.439	465.747	69.0398	0	0	1	1	3	0	15	0	38	0	3	21	12	59.1795	1.55736	0	0	16	0	0	17	0	3	2	0	0	1.64603	-2.38905	-0.539098	0.468084	2.34046	-2.39946	-0.495309	0.627407	2.45976
1	O=C(NCCCc1ccccc1)Nc1ccc(-c2c3c(C)n[nH]c3ncc2)cc1	5.11067	-106404	-789742	101.58	-8.79049	8.79049	-0.28916	62.1182	701.882	457.877	239.635	558.971	142.911	0	0	4	5	4	0	21	0	52	5	9	29	21	76.7294	1.47557	0	0	23	0	0	23	0	5	1	0	0	1.11772	-2.56719	-0.643504	0.697292	2.51671	-2.67158	-0.53808	0.805915	2.54545
1	Clc1cc(NC(=O)Nc2ccc(Oc3c4c(ncc3)cc(OC)c(OC)c4)cc2)ccc1	4.08605	-129634	-951710	-18.4549	-8.67074	8.67074	-0.42504	64.2639	761.147	477.852	278.446	665.67	95.4769	0	0	3	4	4	0	22	0	52	2	6	32	24	87.1903	1.67674	0	0	24	1	0	20	0	3	4	0	0	1.19911	-2.31762	-0.638731	0.688807	2.2688	-2.40218	-0.53808	0.794109	2.47393
1	Clc1c(Cl)cccc1NC(=O)Nc1ccc(Oc2c3c(ncc2)cc(OC)c(OC)c3)cc1	3.34147	-137937	-1.00848e+06	-23.8086	-8.68121	8.68121	-0.4545	65.7771	775.242	459.841	310.094	688.711	86.5318	0	0	3	4	4	0	22	0	52	2	6	33	25	90.9183	1.74843	0	0	24	2	0	19	0	3	4	0	0	1.20696	-2.31415	-0.638731	0.676723	2.27029	-2.40051	-0.53808	0.797977	2.47401
1	N(C)(c1nc(C)nc2oc(C)cc12)c1cc2OCCc2cc1	4.68252	-84615.1	-584905	46.7828	-8.40757	8.40757	-0.3028	46.1595	544.321	372.062	167.563	471.98	72.341	0	0	1	1	3	0	15	0	39	0	3	22	13	60.4021	1.54877	0	0	17	0	0	17	0	3	2	0	0	1.45742	-2.38747	-0.505099	0.511624	2.48725	-2.41109	-0.468577	0.666845	2.55062
1	N(C)(c1nc(C)nc2oc(C)cc12)c1cc2occc2cc1	3.96825	-83952.9	-570426	79.2122	-8.38546	8.38546	-0.4326	44.8259	532.206	316.005	206.524	459.847	72.3589	0	0	1	1	2	0	18	0	37	0	2	22	11	57.9047	1.56499	0	0	17	0	0	15	0	3	2	0	0	1.45778	-2.37812	-0.480759	0.581092	2.34105	-2.39737	-0.44267	0.714066	2.45836
1	Fc1cc(NC(=O)c2cc(Nc3nc(-c4cnccc4)ccn3)c(C)cc2)cc(-n2cc(C)nc2)c1	7.16842	-138595	-1.17766e+06	166.733	-8.83699	8.83699	-0.9491	71.2484	713.02	420.454	289.305	606.987	106.033	0	0	3	4	5	0	29	0	58	2	7	36	25	93.622	1.61417	0	0	27	0	1	22	0	7	1	0	0	1.11231	-2.34059	-0.639071	0.658479	2.31029	-2.31228	-0.492266	0.750643	2.44178
1	O(C)c1cc(O)c2C(=O)O[C@@H](C)C/C=C\C(=O)CCC/C=C\c2c1	2.26893	-100015	-746269	-159.027	-9.30612	9.30612	-0.43827	52.1194	538.009	364.643	173.366	404.576	133.432	0	0	3	4	4	0	6	0	46	1	5	24	17	63.6561	1.38383	0	0	19	0	0	22	0	0	5	0	0	2.03929	-2.54455	-0.607173	0.557338	2.54046	-2.51788	-0.515524	0.631289	2.64339
1	FC(F)(F)c1c(N2N=C(C(=O)Nc3cc(F)c(Oc4c5c(ncc4)cc(OCCCN4CCCC4)c(OC)c5)cc3)C(=O)c3c2cccc3)cccc1	9.86121	-231087	-2.11592e+06	-161.711	-8.43762	8.43762	-1.14255	102.382	1066.01	668.615	391.81	884.744	181.266	0	0	3	4	7	0	28	0	86	1	8	53	40	148.844	1.73074	0	0	39	0	4	33	0	5	5	0	0	0.912776	-2.62558	-0.621077	0.639346	2.69761	-2.68684	-0.512978	0.706947	2.7107
1	O=C(NCCCCCC)Nc1ccc(-c2c3c(C)n[nH]c3ncc2)cc1	5.91502	-98210.1	-713441	54.3067	-8.73614	8.73614	-0.33612	58.1718	663.675	478.303	180.886	497.263	166.412	0	0	4	5	4	0	15	0	51	5	9	26	18	75.1491	1.47351	0	0	20	0	0	25	0	5	1	0	0	1.36295	-2.66578	-0.533315	0.654663	2.60194	-2.67369	-0.441402	0.711722	2.73971
1	Clc1c(N)nccc1Oc1c(F)cc(NC(=O)C=2C(=O)N(c3ccc(F)cc3)C=CC=2OCC)cc1	11.4799	-159411	-1.20457e+06	-90.6641	-8.71701	8.71701	-1.03499	67.5711	771.667	409.703	361.963	605.871	165.795	0	0	3	4	4	0	18	0	55	2	6	36	25	103.168	1.87578	0	0	25	1	2	19	0	4	4	0	0	1.32661	-2.41761	-0.637723	0.673537	2.41222	-2.45195	-0.53808	0.805915	2.432
1	O=C(OC)c1cc2NC(=O)C(C(=Nc3ccc(CN(C)C)cc3)c3ccccc3)c2cc1	3.17052	-121138	-998882	5.14757	-8.99564	8.99564	-0.59226	68.1358	726.338	509.86	216.478	607.934	118.403	0	0	3	4	4	0	18	0	57	1	5	32	23	84.6571	1.48521	0	0	26	0	0	25	0	3	3	0	0	1.42919	-2.55639	-0.579885	0.617213	2.51725	-2.56716	-0.494984	0.729693	2.53299
1	S=C(NC(=O)Cc1ccccc1)Nc1ccc(Oc2c3c(ncc2)cc(OC)c(OC)c3)cc1	5.2697	-132355	-1.03773e+06	-4.88411	-8.67294	8.67294	-0.8215	70.5042	804.138	513.482	284.986	662.75	141.388	0	0	3	5	5	0	22	0	57	2	7	34	24	93.4665	1.63976	0	0	26	0	0	23	0	3	4	0	1	1.16591	-2.37474	-0.613932	0.628622	2.36043	-2.57181	-0.547073	0.787034	2.47377
1	O=C(NCc1ccc(C(=O)Nc2cc(Nc3nc(-c4cnccc4)ccn3)c(C)cc2)cc1)C=C	2.30326	-130679	-1.0913e+06	99.4719	-8.52201	8.52201	-0.49112	71.727	774.466	477.848	292.17	602.128	172.339	0	0	3	5	5	0	24	0	59	3	8	35	24	91.1451	1.54483	0	0	27	0	0	24	0	6	2	0	0	1.18892	-2.39814	-0.641944	0.68675	2.34396	-2.47734	-0.555019	0.787475	2.46323
1	O=[N+]([O-])c1cc2/C(=C/c3[nH]c4c(c3)CN(C(=O)C)CC4)/C(=O)Nc2cc1	4.18226	-106753	-729365	29.9283	-8.56492	8.56492	-1.4098	49.9567	581.124	324.833	256.291	361.806	219.318	0	0	1	1	2	0	11	0	42	2	4	26	17	71.4187	1.70044	0	0	18	0	0	16	0	4	4	0	0	1.36753	-2.61393	-0.522397	0.62274	2.57825	-2.65151	-0.448261	0.623249	2.59332
1	O=C(Nc1cc(CC)ccc1)Nc1ccc(-c2c3c(CO)n[nH]c3ncc2)cc1	5.39371	-110205	-830158	62.8069	-8.90022	8.90022	-0.51806	59.8267	656.29	427.152	224.401	458.87	197.42	0	0	4	6	5	0	21	0	50	6	11	29	20	78.237	1.56474	0	0	22	0	0	21	0	5	2	0	0	1.22174	-2.42913	-0.624341	0.683327	2.37358	-2.40922	-0.518614	0.745918	2.49263
1	FC(F)(F)c1cc(NC(=O)Nc2c(F)cc(Oc3ncnc4c3n(C)cc4)cc2)ccc1	5.62537	-150094	-1.00267e+06	-109.258	-8.92203	8.92203	-0.4856	56.2939	681.608	350.521	331.087	430.159	251.45	0	0	2	3	3	0	21	0	47	2	5	32	22	88.614	1.8854	0	0	21	0	4	15	0	5	2	0	0	1.21615	-2.31395	-0.576333	0.672804	2.36352	-2.40526	-0.497837	0.810292	2.4778
1	O=C(Nc1ccc(Oc2c3c(ncc2)cc(OC)c(OC)c3)cc1)Nc1ccc(C)cc1	5.29027	-124924	-949513	-19.1315	-8.61395	8.61395	-0.40593	65.8442	768.019	526.737	235.824	671.818	96.2003	0	0	3	4	4	0	22	0	55	2	6	32	24	85.0816	1.54694	0	0	25	0	0	23	0	3	4	0	0	1.19182	-2.33791	-0.638731	0.689786	2.2757	-2.40371	-0.53808	0.791192	2.47396
1	Clc1c(NC(=O)Nc2ccc(Oc3c4c(ncc3)cc(OC)c(OC)c4)cc2)ccc(Cl)c1	4.02503	-137938	-1.00627e+06	-25.2202	-8.68601	8.68601	-0.48595	65.7771	775.626	456.441	314.334	689.481	86.1448	0	0	3	4	4	0	22	0	52	2	6	33	25	90.9183	1.74843	0	0	24	2	0	19	0	3	4	0	0	1.19984	-2.31448	-0.638731	0.689655	2.27003	-2.40067	-0.53808	0.805915	2.47399
1	S=C(NCC1CCCCC1)Nc1ccc(Oc2ncnc3c2cc(OC)c(OC)c3)cc1	5.08237	-125451	-990213	-8.36117	-8.37008	8.37008	-0.62592	70.6162	790.193	579.191	206.083	628.265	161.928	0	0	3	4	5	0	16	0	60	2	7	32	21	97.0135	1.61689	0	0	24	0	0	28	0	4	3	0	1	1.17412	-2.80996	-0.576857	0.572061	2.74411	-2.76061	-0.533794	0.69085	2.87098
1	O=C(NC1CC(C)(C)N(O)C(C)(C)C1)c1cc(-c2nn3C(Nc4cc(O)ccc4)=CC=Nc3c2)ccc1	4.25853	-143531	-1.2856e+06	72.5433	-8.70315	8.70315	-0.86998	79.6234	825.27	507.762	317.508	578.304	246.966	0	0	4	6	6	0	17	0	69	4	10	37	24	106.618	1.54518	0	0	28	0	0	32	0	6	3	0	0	1.15241	-2.85726	-0.578375	0.645478	2.82033	-2.9182	-0.482894	0.720055	2.80034
1	O=C(Nc1cc(C)ccc1)Nc1ccc(-c2c3c(C)n[nH]c3ncc2)cc1	4.49441	-99218.7	-719137	113.261	-8.73937	8.73937	-0.46429	55.9311	635.081	400.742	229.467	496.51	138.572	0	0	4	4	4	0	21	0	46	5	9	27	19	69.5249	1.51141	0	0	21	0	0	19	0	5	1	0	0	1.21978	-2.34282	-0.587355	0.646129	2.28695	-2.40472	-0.480793	0.753444	2.44369
1	S=C(Nc1ccc(Oc2c3c(ncc2)cc(OC)c(OC)c3)cc1)NC1CCCCC1	6.07894	-120358	-949304	-11.6921	-8.43352	8.43352	-0.48616	68.8494	760.837	553.867	201.221	642.031	118.806	0	0	3	4	4	0	16	0	58	2	6	31	23	91.8321	1.58331	0	0	24	0	0	27	0	3	3	0	1	1.20312	-2.78933	-0.595713	0.623968	2.72417	-2.7756	-0.53808	0.778375	2.83217
1	O(C)c1c(N(C)c2nc(C)nc3oc(C)cc23)ccc(OC)c1	5.15705	-92635	-666472	5.73686	-8.2434	8.2434	-0.21836	48.2951	575.873	434.199	138.571	508.564	67.3095	0	0	3	4	4	0	15	0	42	0	4	23	13	66.7701	1.58976	0	0	17	0	0	19	0	3	3	0	0	1.71955	-2.39793	-0.497145	0.442119	2.35527	-2.40358	-0.466843	0.59629	2.4969
1	Clc1c(NC(=O)Nc2ccc(Oc3c4c(ncc3)cc(OC)c(OC)c4)cc2)cc(Cl)cc1	4.90608	-137938	-1011162	-24.9285	-8.66898	8.66898	-0.46201	65.7771	774.908	454.101	316.176	688.816	86.0916	0	0	3	4	4	0	22	0	52	2	6	33	25	90.9183	1.74843	0	0	24	2	0	19	0	3	4	0	0	1.20659	-2.31404	-0.638731	0.674624	2.27022	-2.40046	-0.53808	0.794319	2.474
1	Clc1c(OC(C#N)(C)C)cccc1C(=O)Nc1c(F)ccc(N(C)c2nc3sc(NC(=O)C4CC4)nc3cc2)c1	1.95708	-165271	-1.39519e+06	54.016	-8.21045	8.21045	-0.6609	79.926	883.745	478.232	405.513	608.797	274.948	0	0	3	5	6	0	21	0	64	2	8	40	26	119.09	1.86079	0	0	28	1	1	24	0	6	3	0	1	1.11955	-2.47819	-0.644858	0.624516	2.77041	-2.52256	-0.533541	0.729646	2.84151
1	Fc1cc(Nc2[nH]nc3-c4c(cc(OC)c(OC)c4)Cc23)ccc1	1.65322	-98422.4	-645973	22.3958	-8.30318	8.30318	-0.2811	47.8097	582.075	398.445	183.63	497.446	84.6289	0	0	3	4	4	0	17	0	40	3	7	24	18	67.0636	1.67659	0	0	18	0	1	16	0	3	2	0	0	1.39508	-2.32555	-0.595556	0.554882	2.44221	-2.28619	-0.515694	0.729321	2.57912
1	S=C(NCc1ccccc1)Nc1ccc(Oc2ncnc3c2cc(OC)c(OC)c3)cc1	5.54991	-123502	-941035	51.7061	-8.4261	8.4261	-0.59733	66.6154	773.625	509.86	258.92	601.204	172.422	0	0	3	4	5	0	22	0	54	2	7	32	21	89.8624	1.66412	0	0	24	0	0	22	0	4	3	0	1	1.1744	-2.43245	-0.623489	0.619833	2.32271	-2.53169	-0.53808	0.756543	2.45657
1	FC(F)(F)c1cc2/C(=C/c3[nH]c4c(c3)CN(C(=O)N3CCOCC3)CC4)/C(=O)Nc2cc1	1.74142	-146419	-1.06015e+06	-159.545	-8.41222	8.41222	-1.26038	61.1997	668.2	414.655	253.545	456.763	211.437	0	0	2	3	3	0	11	0	53	2	5	32	23	95.7238	1.80611	0	0	22	0	3	21	0	4	3	0	0	1.16974	-2.6895	-0.408018	0.500238	2.63981	-2.81145	-0.321383	0.572081	2.59541
1	FC(F)(F)c1cc(C(=O)Nc2cc(CNc3cnc4[nH]c(C(=O)OC)cc4c3)c(C)cc2)cc(-n2cc(C)nc2)c1	3.69934	-177868	-1.40335e+06	-89.4616	-8.45101	8.45101	-1.24087	78.3868	898.264	508.753	383.742	606.94	291.324	0	0	4	5	5	0	26	0	66	4	9	41	28	116.933	1.77171	0	0	29	0	3	25	0	6	3	0	0	1.11016	-2.4372	-0.49982	0.602782	2.38568	-2.35647	-0.453288	0.646105	2.51394
1	O=C(Nc1ccc(Oc2ccccc2)cc1)N1CCN(c2ncnc3c2cc(OC)c(OC)c3)CC1	3.6547	-141625	-1171310	45.1033	-8.53708	8.53708	-0.80005	74.2314	797.578	583.96	209.871	683.317	114.261	0	0	3	4	5	0	22	0	63	1	6	36	24	100.195	1.5904	0	0	27	0	0	27	0	5	4	0	0	1.04223	-2.71186	-0.640357	0.671155	2.64465	-2.86146	-0.545923	0.776227	2.52949
1	N(C)(c1nc(C)nc2oc(C)cc12)c1cc2OCOc2cc1	3.68706	-88402.1	-591026	22.0422	-8.54527	8.54527	-0.36964	43.8679	531.371	355.767	170.754	417.967	113.404	0	0	2	2	4	0	15	0	37	0	4	22	11	60.6366	1.63883	0	0	16	0	0	15	0	3	3	0	0	1.45742	-2.3808	-0.478435	0.48307	2.37704	-2.39754	-0.455119	0.65169	2.51258
1	S=C(Nc1ccc(F)cc1)Nc1ccc(Oc2c3c(ncc2)cc(OC)c(OC)c3)cc1	5.41327	-129280	-949616	3.23019	-8.58214	8.58214	-0.78937	64.7389	746.973	475.058	266.546	627.285	119.688	0	0	3	4	4	0	22	0	52	2	6	32	24	90.4354	1.73914	0	0	24	0	1	20	0	3	3	0	1	1.19182	-2.34144	-0.638928	0.689877	2.26459	-2.40056	-0.53808	0.805915	2.47392
1	N(C)(c1nc(Nc2cc(C)cc(C)c2)ncc1)c1cc2nn(C)c(C)c2cc1	3.59078	-101116	-799192	178.824	-8.20964	8.20964	-0.26467	61.323	690.024	481.638	203.27	618.511	71.5138	0	0	2	3	3	0	21	0	52	1	4	28	20	72.7665	1.39936	0	0	22	0	0	24	0	6	0	0	0	1.29612	-2.38935	-0.564101	0.38226	2.33756	-2.40086	-0.485064	0.473939	2.46691
1	S(=O)(=O)(C)c1ccc(-c2cc3nnc(C(=O)N)c(N[C@H](C)C4CC4)c3cc2)cc1	3.96583	-114661	-882968	20.791	-9.30353	9.30353	-1.5041	61.3354	663.93	357.322	297.768	393.495	270.435	0	0	3	5	5	0	16	0	51	2	7	29	20	86.1926	1.69005	0	0	21	0	0	22	0	4	3	0	1	1.36283	-2.55575	-0.542387	0.619392	2.80477	-2.59921	-0.444029	0.691845	2.89129
1	O=C(OC)c1cc2NC(=O)C(C(=Nc3ccc(CN4CCCCC4)cc3)c3ccccc3)c2cc1	4.18084	-131281	-1.14476e+06	-7.76227	-8.99401	8.99401	-0.60431	76.083	773.273	532.966	240.307	655.853	117.42	0	0	3	4	4	0	18	0	64	1	5	35	26	92.7273	1.44886	0	0	29	0	0	29	0	3	3	0	0	1.20653	-2.77195	-0.643838	0.698298	2.68188	-2.74576	-0.53808	0.805915	2.75146
1	O=C(NCCOC)c1cc2C(=C(c3[nH]c4c(n3)cccc4)c3ccccc3)C(=O)Nc2cc1	2.6711	-124934	-1.03253e+06	45.3535	-8.8469	8.8469	-1.16565	67.2354	739.144	476.297	262.846	596.541	142.603	0	0	4	5	5	0	21	0	55	4	9	33	23	84.901	1.54365	0	0	26	0	0	22	0	4	3	0	0	1.33471	-2.49531	-0.635293	0.640151	2.45297	-2.67736	-0.53808	0.729113	2.46306
1	Clc1c(Cl)ccc(NC(=O)Nc2ccc(Oc3c4c(ncc3)cc(OC)c(OC)c4)cc2)c1	4.28088	-137937	-1.00091e+06	-23.9091	-8.6981	8.6981	-0.47088	65.7771	781.591	461.078	314.914	685.762	95.8294	0	0	3	4	4	0	22	0	52	2	6	33	25	90.9183	1.74843	0	0	24	2	0	19	0	3	4	0	0	1.19273	-2.31632	-0.638731	0.690129	2.26934	-2.40194	-0.53808	0.805915	2.47396
1	N(c1[nH]nc(C)c1)c1nc(C=Cc2ccccc2)nc(N2CCN(C)CC2)c1	1.15762	-103256	-808438	178.028	-8.86983	8.86983	-0.67268	61.3298	700.747	483.237	217.51	589.525	111.222	0	0	3	4	5	0	17	0	53	3	8	28	17	75.5932	1.42629	0	0	21	0	0	25	0	7	0	0	0	1.32616	-2.74174	-0.600891	0.640887	2.64412	-2.87	-0.496658	0.722631	2.53564
1	O(C)c1cc2c(N(c3nc(C)nc4oc(C)cc34)CCC2)cc1	2.19542	-88216.2	-638545	32.4552	-8.29587	8.29587	-0.54487	49.2531	563.16	389.182	171.446	494.059	69.1015	0	0	2	2	3	0	15	0	42	0	3	23	14	63.9532	1.52269	0	0	18	0	0	19	0	3	2	0	0	1.51904	-2.62095	-0.526841	0.487943	2.57224	-2.60494	-0.469409	0.62242	2.64147
1	Clc1ccc(Nc2nc(NC3CCC(N)CC3)nc3n(CCC(C)C)cnc23)cc1	3.87204	-116491	-979205	86.4932	-8.20579	8.20579	-0.23803	68.6038	734.934	505.088	229.846	557.232	177.703	0	0	3	4	4	0	15	0	60	3	7	30	19	89.4477	1.4908	0	0	22	1	0	30	0	7	0	0	0	1.38988	-2.79811	-0.581682	0.627262	2.74563	-2.8347	-0.532089	0.734774	2.78762
1	O=C(N(CCCN(C)C)c1ccc(N=C(c2ccccc2)C2C(=O)Nc3c2ccc(C(=O)NCC)c3)cc1)C	7.32503	-148625	-1.36965e+06	29.8358	-8.74903	8.74903	-0.31285	85.8038	874.923	596.816	278.107	702.862	172.061	0	0	3	4	5	0	18	0	74	2	7	39	27	110.03	1.48689	0	0	31	0	0	35	0	5	3	0	0	1.38148	-2.65479	-0.564778	0.577763	2.56935	-2.71801	-0.514713	0.660994	2.54645
1	Clc1ccc(Nc2nc(NC3CCC(N)CC3)nc3n(CCCC)cnc23)cc1	4.73101	-112899	-916140	91.5462	-8.23991	8.23991	-0.24966	65.5102	713.62	497.964	215.656	547.936	165.685	0	0	3	4	4	0	15	0	57	3	7	29	18	85.9786	1.5084	0	0	21	1	0	28	0	7	0	0	0	1.38654	-2.79811	-0.588655	0.646952	2.74562	-2.8347	-0.542	0.760503	2.78761
1	O=C(N1Cc2c([nH]c(/C=C/3\C(=O)Nc4c\3cc(OC)cc4)c2)CC1)N1CCN(C)CC1	4.09254	-122454	-979376	8.72525	-8.12168	8.12168	-0.90028	66.3894	707.959	548.241	159.718	594.468	113.492	0	0	2	3	4	0	11	0	58	2	6	31	21	90.9745	1.56853	0	0	23	0	0	27	0	5	3	0	0	1.14943	-2.75321	-0.434674	0.447628	2.66723	-2.88257	-0.354137	0.56645	2.59813
1	FC(F)(F)c1cc2/C(=C/c3[nH]c4c(c3)CN(C(=O)C)CC4)/C(=O)Nc2cc1	3.92622	-123812	-807700	-129.092	-8.43214	8.43214	-1.18926	50.6837	589.931	314.616	275.315	349.881	240.049	0	0	2	2	2	0	11	0	43	2	4	27	20	77.109	1.79323	0	0	19	0	3	16	0	3	2	0	0	1.37855	-2.61393	-0.449083	0.529473	2.57825	-2.65151	-0.365601	0.588926	2.59362
1	O=C(Nc1ccc(C)cc1)Nc1ccc(-c2c3c(C)n[nH]c3ncc2)cc1	4.21014	-99218.7	-718618	113.194	-8.68046	8.68046	-0.45488	55.9311	637.478	402.231	230.389	496.337	141.141	0	0	4	4	4	0	21	0	46	5	9	27	19	69.5249	1.51141	0	0	21	0	0	19	0	5	1	0	0	1.20982	-2.33935	-0.643504	0.70165	2.28498	-2.40394	-0.53808	0.805915	2.4434
1	Clc1cc(Nc2nc(NC3CCC(N)CC3)nc3n(CCC(C)C)cnc23)ccc1	3.31656	-116491	-986081	85.8766	-8.33461	8.33461	-0.27387	68.6038	710.462	493.039	217.423	537.888	172.574	0	0	3	4	4	0	15	0	60	3	7	30	19	89.4477	1.4908	0	0	22	1	0	30	0	7	0	0	0	1.40121	-2.79811	-0.581671	0.627314	2.74563	-2.8347	-0.50583	0.717845	2.78762
1	Oc1cc(Nc2nc(NC3CCC(N)CC3)nc3n(CCC(C)C)cnc23)ccc1	3.38384	-115581	-991699	48.2148	-8.28717	8.28717	-0.21982	67.8926	712.562	528.89	183.672	500.712	211.85	0	0	4	5	5	0	15	0	61	4	9	30	18	90.4359	1.48256	0	0	22	0	0	31	0	7	1	0	0	1.40121	-2.79811	-0.570876	0.63619	2.74563	-2.8347	-0.529107	0.709381	2.78762
1	O(C)c1c(OC)ccc(N(C)c2nc(C)nc3oc(C)cc23)c1	5.57924	-92633.8	-662974	6.94079	-8.43609	8.43609	-0.34636	48.2951	577.29	443.121	130.104	511.335	65.9551	0	0	3	4	4	0	15	0	42	0	4	23	13	66.7701	1.58976	0	0	17	0	0	19	0	3	3	0	0	1.68221	-2.3941	-0.495279	0.399632	2.34864	-2.40081	-0.462699	0.556681	2.49001
1	Fc1c(NC(=O)Nc2c(C)cc(Oc3c4c(ncc3)cc(OC)c(OC)c4)cc2)ccc(F)c1	4.08749	-146665	-1.07957e+06	-108.216	-8.67749	8.67749	-0.48735	65.6247	766.005	496.517	264.078	682.781	83.2242	0	0	3	4	4	0	22	0	55	2	6	34	26	94.8848	1.72518	0	0	25	0	2	21	0	3	4	0	0	1.24067	-2.35217	-0.595714	0.54187	2.30932	-2.41054	-0.508958	0.775833	2.48806
1	Fc1c(NC(=O)Nc2c(F)cc(Oc3c4c(ncc3)cc(OC)c(OC)c4)cc2)ccc(F)c1	2.24759	-153942	-1.08779e+06	-145.72	-8.77077	8.77077	-0.62412	62.4213	754.582	477.49	271.039	662.868	91.7141	0	0	3	4	4	0	22	0	52	2	6	34	26	93.8153	1.80414	0	0	24	0	3	18	0	3	4	0	0	1.24067	-2.30263	-0.672371	0.683661	2.28208	-2.40593	-0.509206	0.802416	2.47279
1	FC(F)(F)c1cc(NC(=O)c2cc(Nc3nc(-c4cnccc4)ccn3)c(C)cc2)cc(-n2cc(C)nc2)c1	8.10824	-163944	-1.37699e+06	15.2146	-8.8974	8.8974	-0.94464	74.1224	740.242	425.222	313.24	549.823	190.419	0	0	3	4	5	0	29	0	61	2	7	39	28	104.655	1.71566	0	0	28	0	3	22	0	7	1	0	0	1.15208	-2.34349	-0.58093	0.65409	2.37685	-2.31432	-0.492266	0.687577	2.49108
1	S(=O)(=O)(N)c1c(C)ccc(Nc2nc(N(C)c3cc4nn(C)c(C)c4cc3)ccn2)c1	9.50987	-121872	-949454	117.619	-8.41325	8.41325	-0.50709	64.5002	719.717	465.352	249.203	522.748	196.969	0	0	3	5	5	0	21	0	54	2	7	31	19	92.8318	1.71911	0	0	21	0	0	23	0	7	2	0	1	1.29723	-2.38821	-0.575525	0.476641	2.40991	-2.57611	-0.513884	0.537556	2.46273
1	FC(F)(F)Oc1ccc(Nc2nc(N(C)c3cc4nn(C)cc4cc3)ccn2)cc1	6.3532	-133948	-919394	0.33632	-8.42831	8.42831	-0.39252	55.6085	674.921	403.176	266.628	476.151	198.77	0	0	3	4	4	0	21	0	47	1	5	30	21	84.8756	1.80586	0	0	20	0	3	17	0	6	1	0	0	1.221	-2.38481	-0.619982	0.654147	2.32625	-2.40066	-0.540893	0.715442	2.43581
1	O(C)c1cc2c(NC(N(C)c3nc(C)nc4oc(C)cc34)C2)cc1	3.46199	-93291.5	-671245	52.7796	-8.36299	8.36299	-0.37334	51.0199	591.521	417.744	168.561	500.934	90.5875	0	0	2	2	3	0	15	0	44	1	4	24	13	68.7178	1.56177	0	0	18	0	0	20	0	4	2	0	0	1.43016	-2.55337	-0.489796	0.451547	2.58948	-2.69014	-0.424175	0.591958	2.58115
1	Clc1c(N2C(=O)N([C@@H]3CN(C(=O)CC)CC3)c3nc(Nc4cc(C)c(N5CCN(C6COC6)CC5)cc4)ncc3C2)cc(OC)cc1	3.93794	-189667	-1872338	34.119	-8.84599	8.84599	-0.53977	101.367	1006.46	653.199	263.605	819.622	186.841	0	0	3	4	7	0	18	0	88	1	8	47	31	143.797	1.63405	0	0	34	1	0	41	0	8	4	0	0	0.984893	-2.8142	-0.552515	0.555492	2.74382	-2.94862	-0.448193	0.670562	2.65869
1	S(=O)(=O)(N(CCN(C)C)c1ccc(N=C(c2ccccc2)C2C(=O)Nc3c2ccc(C(=O)NCC)c3)cc1)C	1.23401	-153938	-1.41275e+06	-6.98314	-9.216	9.216	-0.76042	84.6522	875.195	585.886	289.31	682.237	192.959	0	0	3	5	6	0	18	0	72	2	8	39	26	117.278	1.62887	0	0	29	0	0	33	0	5	4	0	1	1.41128	-2.65174	-0.562615	0.577701	2.57043	-2.76609	-0.506225	0.638513	2.53217
1	O=C(OCC(C)C)Nc1ccc(C2=C(N)n3ncc(-c4ccc(N5CCN(C)CC5)cc4)c3N=C2)cc1	4.37942	-141267	-1.18961e+06	82.9701	-7.70356	7.70356	-0.41915	80.5882	867.407	642.057	225.35	663.754	203.653	0	0	3	4	4	0	17	0	70	2	6	37	24	106.327	1.51896	0	0	28	0	0	33	0	7	2	0	0	1.0563	-2.74729	-0.606356	0.652825	2.64133	-2.86967	-0.537783	0.740262	2.61603
1	N(C)(c1nc(Nc2cc(C)cc(C)c2)ncc1)c1cc2nn(C)cc2cc1	3.57917	-97521.3	-747472	186.951	-8.30931	8.30931	-0.28024	58.2294	669.172	465.186	198.87	585.791	83.3813	0	0	2	3	3	0	21	0	49	1	4	27	19	69.2648	1.41357	0	0	21	0	0	22	0	6	0	0	0	1.28912	-2.38856	-0.573063	0.568298	2.32296	-2.40078	-0.541706	0.643563	2.46378
1	Clc1cc(Cl)cc(NC(=O)Nc2ccc(Oc3c4c(ncc3)cc(OC)c(OC)c4)cc2)c1	4.98246	-137937	-1.00481e+06	-24.3608	-8.68614	8.68614	-0.4687	65.7771	781.588	456.423	319.399	685.908	95.6796	0	0	3	4	4	0	22	0	52	2	6	33	25	90.9183	1.74843	0	0	24	2	0	19	0	3	4	0	0	1.19945	-2.31581	-0.638731	0.671808	2.26948	-2.40172	-0.53808	0.805915	2.47396
1	N(C)(c1nc(Nc2cc(C)ccc2)ncc1)c1cc2nn(C)c(C)c2cc1	3.94536	-97522.3	-750522	185.989	-8.21652	8.21652	-0.28433	58.2294	656.342	455.068	196.11	584.696	71.646	0	0	2	3	3	0	21	0	49	1	4	27	19	69.2648	1.41357	0	0	21	0	0	22	0	6	0	0	0	1.29241	-2.38674	-0.583036	0.584029	2.33655	-2.40079	-0.485339	0.66471	2.45913
1	O=C(NCCc1ccccc1)Nc1ccc(-c2c3c(C)n[nH]c3ncc2)cc1	4.70752	-102811	-754936	107.499	-8.7385	8.7385	-0.41168	59.0247	665.49	428.132	231.96	522.709	142.781	0	0	4	5	4	0	21	0	49	5	9	28	20	73.165	1.49316	0	0	22	0	0	21	0	5	1	0	0	1.15025	-2.50084	-0.643504	0.6973	2.44822	-2.66704	-0.53808	0.805915	2.44449
1	O=C(Nc1cc(N(C)C)ccc1)Nc1ccc(-c2c3c(C)n[nH]c3ncc2)cc1	5.60727	-107884	-814143	131.956	-8.55117	8.55117	-0.40315	60.7914	673.376	470.405	198.509	534.776	138.601	0	0	4	5	4	0	21	0	51	5	9	29	20	77.5689	1.52096	0	0	22	0	0	22	0	6	1	0	0	1.20875	-2.47522	-0.558949	0.640929	2.35374	-2.53857	-0.469477	0.729559	2.44494
1	O=C(Nc1ccc(-c2c3c(C)n[nH]c3ncc2)cc1)NC1Cc2c(cccc2)C1	5.20206	-105764	-800287	112.102	-8.89084	8.89084	-0.2821	60.7847	673.403	430.338	239.079	535.635	137.768	0	0	4	4	4	0	21	0	50	5	9	29	21	74.3026	1.48605	0	0	23	0	0	21	0	5	1	0	0	1.06476	-2.53587	-0.586313	0.661395	2.62544	-2.71727	-0.500839	0.733507	2.5983
1	Fc1c2/C(=C/c3c(C)c(C(=O)NCCN(CC)CC)c(C)[nH]3)/C(=O)Nc2ccc1	4.23267	-118559	-906586	-42.0947	-8.33832	8.33832	-1.1382	63.2844	683.946	436.615	247.331	534.483	149.464	0	0	2	3	3	0	11	0	56	3	6	29	21	88.7224	1.58433	0	0	22	0	1	27	0	4	2	0	0	1.5569	-2.68178	-0.493315	0.470155	2.57548	-2.79135	-0.3576	0.586348	2.52057
1	O(C(C)C)c1ccc(N(C)c2nc(C)nc3oc(C)cc23)cc1	4.79465	-88846.3	-645944	32.1932	-8.4444	8.4444	-0.33806	50.5867	590.749	404.246	183.312	487.15	103.599	0	0	2	3	3	0	15	0	44	0	3	23	14	66.1628	1.5037	0	0	18	0	0	21	0	3	2	0	0	1.58392	-2.51054	-0.444968	0.44156	2.47819	-2.50905	-0.411567	0.599886	2.52248
1	O=C(Nc1cc(-n2cc(C)nc2)ccc1)c1cc(Nc2nc(-c3cnccc3)ccn2)c(C)cc1	3.50717	-127724	-1.12007e+06	170.561	-8.81447	8.81447	-0.80543	71.3582	686.441	426.875	257.338	579.763	106.678	0	0	3	4	5	0	29	0	58	2	7	35	24	87.6875	1.51185	0	0	27	0	0	23	0	7	1	0	0	1.09555	-2.34202	-0.59292	0.660811	2.30816	-2.31139	-0.496977	0.750626	2.44209
1	Clc1cc(Nc2nc(N(C)c3cc4nn(C)c(C)c4cc3)ccn2)ccc1	3.87595	-102232	-752939	186.672	-8.25983	8.25983	-0.31645	56.6491	657.202	411.991	240.082	585.377	71.8255	0	0	2	3	3	0	21	0	46	1	4	27	19	71.4249	1.55272	0	0	20	1	0	19	0	6	0	0	0	1.29241	-2.38565	-0.604129	0.597306	2.33622	-2.40071	-0.494322	0.732676	2.45852
1	O(C)c1cc(Nc2nc(N(C)c3cc4nn(C)cc4cc3)ccn2)ccc1	5.28847	-101307	-749136	163.497	-8.3617	8.3617	-0.45197	55.9379	646.34	475.181	166.011	539.971	106.369	0	0	3	4	4	0	21	0	47	1	5	27	18	72.6788	1.54636	0	0	20	0	0	20	0	6	1	0	0	1.27677	-2.38505	-0.630179	0.633261	2.31922	-2.40068	-0.570812	0.717033	2.43612
1	Br[C@@H]1C[C@H](C)OC(=O)c2c(O)cc(OC)cc2/C=C\CCCC(=O)C1	3.49581	-108504	-826376	-168.525	-9.37654	9.37654	-0.56825	55.8362	579.26	364.476	214.784	399.682	179.578	0	0	3	4	4	0	6	0	48	1	5	25	18	71.716	1.49408	0	1	19	0	0	23	0	0	5	0	0	2.07468	-2.6265	-0.599157	0.460444	2.64723	-2.62508	-0.518125	0.517053	2.68949
1	Fc1c(NC(=O)Nc2ccc(-c3c4c(C)n[nH]c4ncc3)cc2)cc(C)cc1	3.06402	-110090	-780024	67.7199	-8.83024	8.83024	-0.46025	55.8213	635.378	387.788	243	499.869	135.509	0	0	4	4	4	0	21	0	46	5	9	28	20	75.1769	1.63428	0	0	21	0	1	18	0	5	1	0	0	1.2309	-2.33312	-0.6149	0.632724	2.29451	-2.40631	-0.453488	0.789723	2.44334
1	O=C(Nc1cc(C)ccc1)Nc1ccc(-c2c3c(CO)n[nH]c3ncc2)cc1	4.9088	-106614	-778733	67.4912	-8.76916	8.76916	-0.60558	56.7331	638.572	405.098	228.433	453.109	185.463	0	0	4	6	5	0	21	0	47	6	11	28	19	74.5067	1.58525	0	0	21	0	0	19	0	5	2	0	0	1.23115	-2.34289	-0.624767	0.683705	2.30408	-2.40472	-0.518981	0.746602	2.45121
1	O(C)c1cc(O)c2C(=O)O[C@@H](C)C/C=C\C(=O)CCCCCc2c1	1.77951	-100675	-752522	-189.996	-9.28555	9.28555	-0.36554	53.453	555.843	369.598	186.245	417.376	138.467	0	0	3	4	4	0	6	0	48	1	5	24	17	65.7188	1.36914	0	0	19	0	0	24	0	0	5	0	0	2.03834	-2.63351	-0.55179	0.465328	2.60075	-2.53408	-0.474744	0.529118	2.72671
1	O=C(Nc1ccc(C(C)C)cc1)N1CCN(c2ncnc3c2cc(OC)c(OC)c3)CC1	1.15213	-126054	-1.04038e+06	-4.55554	-8.66601	8.66601	-0.73378	69.483	750.566	583.603	163.199	593.522	157.044	0	0	3	4	5	0	16	0	61	1	6	32	21	94.4899	1.54901	0	0	24	0	0	29	0	5	3	0	0	1.252	-2.71192	-0.597081	0.556311	2.64469	-2.86147	-0.53808	0.655184	2.64368
1	O=C(Nc1cc2/C(=C/c3[nH]c4c(c3)CN(C(=O)N3CCOCC3)CC4)/C(=O)Nc2cc1)C	4.29709	-129224	-1.01256e+06	-41.2611	-8.14694	8.14694	-0.95873	65.8578	712.559	499.32	213.238	542.467	170.092	0	0	2	4	4	0	11	0	57	3	7	32	20	92.7268	1.62679	0	0	23	0	0	25	0	5	4	0	0	1.15212	-2.6895	-0.488128	0.484853	2.63981	-2.81145	-0.426216	0.555248	2.59517
1	S(C)c1ccc(Nc2nc(N(C)c3cc4nn(C)c(C)c4cc3)ccn2)cc1	6.26056	-102004	-792331	193.416	-7.82286	7.82286	-0.44993	61.1294	677.996	441.918	231.045	552.744	125.252	0	0	2	3	3	0	21	0	50	1	4	28	20	76.3369	1.52674	0	0	21	0	0	22	0	6	0	0	1	1.26438	-2.38597	-0.59076	0.553025	2.33628	-2.40073	-0.520402	0.723165	2.45913
1	Fc1c(Oc2c3c(ncc2)cc(OCCCN2CCN(C)CC2)c(OC)c3)ccc(NC(=O)C=2N(C)C(=O)N(c3c(F)cccc3)N=2)c1	1.72567	-204096	-1.78586e+06	-45.9455	-8.59192	8.59192	-0.88291	96.0018	1048.82	755.33	288.244	923.913	124.902	0	0	3	4	8	0	22	0	83	1	9	48	33	143.369	1.72733	0	0	34	0	2	35	0	7	5	0	0	0.942621	-2.78713	-0.605177	0.628096	2.67877	-2.89711	-0.507955	0.738929	2.5911
1	Clc1cc(Nc2nc(N(C)c3cc4nn(C)cc4cc3)ccn2)ccc1	4.07221	-98635.9	-700856	195.945	-8.38612	8.38612	-0.32158	53.5555	632.968	393.392	234.007	549.168	83.7994	0	0	2	3	3	0	21	0	43	1	4	26	18	67.6221	1.57261	0	0	19	1	0	17	0	6	0	0	0	1.28449	-2.38467	-0.665141	0.688076	2.3188	-2.40064	-0.542077	0.749513	2.43411
1	N(c1nc(NC2CCC(N)CC2)nc2n(CCC(C)C)cnc12)c1ccccc1	2.59044	-108186	-925337	93.7652	-8.12166	8.12166	-0.05852	67.0906	708.456	531.24	177.216	531.527	176.929	0	0	3	4	4	0	15	0	60	3	7	29	18	83.0744	1.38457	0	0	22	0	0	31	0	7	0	0	0	1.39325	-2.79811	-0.581669	0.627368	2.74563	-2.8347	-0.532097	0.687819	2.78762
1	O(C)c1cc(Nc2nc(N(C)c3cc4nn(C)c(C)c4cc3)ccn2)ccc1	5.53654	-104902	-798631	155.277	-8.32838	8.32838	-0.43576	59.0314	661.246	483.37	173.004	569.622	91.624	0	0	3	4	4	0	21	0	50	1	5	28	19	76.3369	1.52674	0	0	21	0	0	22	0	6	1	0	0	1.28442	-2.38602	-0.591798	0.54797	2.33638	-2.40076	-0.543772	0.648859	2.45894
1	O=C(Nc1c2c(ccc1)cccc2)Nc1ccc(-c2c3c(C)n[nH]c3ncc2)cc1	4.19297	-108062	-821509	141.268	-8.50093	8.50093	-0.52354	61.2111	660.446	389.849	255.448	529.894	130.552	0	0	4	4	4	0	25	0	49	5	9	30	22	72.7614	1.48493	0	0	24	0	0	19	0	5	1	0	0	1.08763	-2.32596	-0.642426	0.69289	2.28222	-2.40099	-0.521904	0.805915	2.4441
1	Brc1cc(Nc2nc(N(C)c3cc4nn(C)c(C)c4cc3)ccn2)ccc1	4.30406	-101757	-746165	200.677	-8.25014	8.25014	-0.31889	57.5191	663.225	396.203	262.399	592.494	70.7306	0	0	2	3	3	0	21	0	46	1	4	27	19	71.4249	1.55272	0	1	20	0	0	19	0	6	0	0	0	1.29241	-2.38568	-0.604103	0.59831	2.33621	-2.40072	-0.492877	0.735575	2.45853
1	O=C(NCC)c1cc2NC(=O)C(C(=Nc3ccc(CN(C)C)cc3)c3ccccc3)c2cc1	5.46287	-122430	-1044311	46.6138	-9.00696	9.00696	-0.30865	72.1942	750.405	522.238	228.168	606.908	143.497	0	0	3	4	4	0	18	0	61	2	6	33	24	88.7871	1.45553	0	0	27	0	0	28	0	4	2	0	0	1.41881	-2.55639	-0.571886	0.578537	2.5183	-2.60569	-0.53808	0.691594	2.53311
1	Fc1cc(O)c(-c2c(-c3cc4c(C)n[nH]c4cc3)cc(N[C@@H](CO)c3ccccc3)cn2)cc1	6.7422	-132011	-1.09631e+06	32.1103	-8.62754	8.62754	-0.44706	69.4172	716.289	408.402	300.975	568.963	147.325	0	0	4	5	5	0	27	0	57	5	10	34	28	90.0508	1.57984	0	0	27	0	1	23	0	4	2	0	0	1.29675	-2.51685	-0.650575	0.702804	2.4822	-2.51748	-0.576389	0.793842	2.5442
1	Fc1cc(-c2c(-c3cc4c(C)n[nH]c4cc3)cc(N[C@@H](CO)c3ccccc3)cn2)c(O)cc1	5.08739	-132010	-1.09844e+06	32.5443	-8.68887	8.68887	-0.45438	69.4172	723.393	419.273	296.425	577.008	146.385	0	0	4	5	5	0	27	0	57	5	10	34	28	90.0508	1.57984	0	0	27	0	1	23	0	4	2	0	0	1.30552	-2.51684	-0.650401	0.703435	2.48221	-2.51748	-0.577014	0.792797	2.54416
1	Clc1cc(-c2c(-c3cc4c(cncc4)cc3)cc(N[C@@H](CO)c3ccccc3)cn2)c(O)cc1	5.51501	-127327	-1.06764e+06	48.0095	-8.88331	8.88331	-0.75974	71.0334	732.793	425.234	297.605	618.142	114.651	0	0	3	4	4	0	28	0	56	3	7	34	29	85.7436	1.53113	0	0	28	1	0	22	0	3	2	0	0	1.29462	-2.51687	-0.689345	0.750594	2.48217	-2.51748	-0.599212	0.819282	2.5447
1	Clc1cc(-c2c(-c3cc4c(C)n[nH]c4cc3)cc(N[C@@H](CO)c3ccccc3)cn2)c(O)cc1	4.69026	-129443	-1.09171e+06	70.3904	-8.74151	8.74151	-0.41065	71.0402	741.234	408.566	325.025	595.036	146.198	0	0	4	5	5	0	27	0	57	5	10	34	28	90.0508	1.57984	0	0	27	1	0	23	0	4	2	0	0	1.30552	-2.51685	-0.650409	0.703351	2.4822	-2.51748	-0.576982	0.793068	2.54496
1	FC(F)(F)Oc1ccc(Nc2nc(N(C)c3cc4nn(C)c(C)c4cc3)ccn2)cc1	7.69316	-137543	-958910	-8.18199	-8.40661	8.40661	-0.50315	58.7021	697.437	420.934	271.137	503.674	193.764	0	0	3	4	4	0	21	0	50	1	5	31	22	88.9789	1.77958	0	0	21	0	3	19	0	6	1	0	0	1.22911	-2.38579	-0.592948	0.544742	2.33745	-2.40074	-0.52047	0.646045	2.45883
1	FC(F)(F)c1cc(NC(=O)Nc2ccc(-c3c4c(C)n[nH]c4ncc3)cc2)ccc1	1.35262	-131845	-884702	-35.0926	-8.93194	8.93194	-0.58847	55.6017	650.671	346.111	299.69	410.783	239.888	0	0	4	4	4	0	21	0	46	5	9	30	22	81.4807	1.77132	0	0	21	0	3	16	0	5	1	0	0	1.2124	-2.32555	-0.586293	0.647204	2.36301	-2.40401	-0.479671	0.754152	2.47813
1	O=C(N(C)c1ccc(N=C(c2ccccc2)C2C(=O)Nc3c2ccc(C(=O)NCC)c3)cc1)CN1CCN(C)CC1	2.71141	-156657	-1.46662e+06	33.9395	-8.52084	8.52084	-0.31368	89.3306	917.094	657.238	259.856	752.668	164.426	0	0	3	4	6	0	18	0	77	2	8	41	28	116.161	1.50858	0	0	32	0	0	36	0	6	3	0	0	1.16579	-2.76757	-0.564832	0.57772	2.66908	-2.89641	-0.514904	0.660679	2.54344
1	O=C(CCN)N1Cc2c([nH]c(/C=C/3\C(=O)Nc4c\3cc(OC)cc4)c2)CC1	4.69179	-107256	-778104	-18.6017	-8.22375	8.22375	-0.98264	56.6754	645.023	471.972	173.052	458.86	186.163	0	0	2	3	4	0	11	0	49	3	7	27	18	77.8198	1.58816	0	0	20	0	0	22	0	4	3	0	0	1.33167	-2.62788	-0.570262	0.538013	2.59632	-2.71333	-0.506669	0.598104	2.59822
1	O=C(Nc1cc2c(cc1)cccc2)Nc1ccc(-c2c3c(C)n[nH]c3ncc2)cc1	4.12057	-108063	-814392	139.512	-8.48856	8.48856	-0.4733	61.2111	674.263	401.327	257.722	534.755	139.508	0	0	4	4	4	0	25	0	49	5	9	30	22	72.7614	1.48493	0	0	24	0	0	19	0	5	1	0	0	1.05735	-2.32458	-0.643504	0.702532	2.28138	-2.40228	-0.53808	0.805915	2.4434
1	O=C(Nc1cc(C)c(N2CCN(C)CC2)cc1)Nc1ccc(-c2c3c(C)n[nH]c3ncc2)cc1	5.08124	-126692	-1.0529e+06	135.191	-8.69975	8.69975	-0.45368	73.599	768.808	559.739	203.858	614.546	154.262	0	0	4	5	5	0	21	0	63	5	10	34	24	93.8243	1.48927	0	0	26	0	0	29	0	7	1	0	0	1.0278	-2.74851	-0.518034	0.581347	2.64305	-2.87009	-0.412743	0.684895	2.56209
1	S(=O)(=O)(C)c1ccc(-c2cc3nnc(C(=O)N)c(NC(C)C)c3cc2)cc1	5.78891	-108144	-793723	-5.5993	-9.52729	9.52729	-1.52491	56.4819	620.296	340.279	272.387	365.638	254.658	0	0	2	4	5	0	16	0	47	2	7	27	18	81.1616	1.72684	0	0	19	0	0	20	0	4	3	0	1	1.59459	-2.56757	-0.574973	0.616603	2.49784	-2.59025	-0.472094	0.682683	2.53433
1	O=C(N(CCN(C)C)c1ccc(N=C(c2ccccc2)C2C(=O)Nc3c2ccc(C(=O)NCC)c3)cc1)C	6.19933	-145031	-1.31763e+06	19.965	-8.74009	8.74009	-0.29083	82.7102	837.139	562.156	274.984	664.186	172.953	0	0	3	4	5	0	18	0	71	2	7	38	26	106.596	1.50135	0	0	30	0	0	33	0	5	3	0	0	1.39854	-2.62728	-0.564798	0.577763	2.5321	-2.74213	-0.514737	0.66107	2.53084
1	Fc1cc(Nc2nc(N(C)c3cc4nn(C)c(C)c4cc3)ccn2)ccc1	6.37366	-104799	-746396	147.969	-8.35851	8.35851	-0.46971	55.0261	640.522	429.087	206.841	566.272	74.2501	0	0	2	3	3	0	21	0	46	1	4	27	19	71.4249	1.55272	0	0	20	0	1	19	0	6	0	0	0	1.29241	-2.38556	-0.604156	0.594802	2.33628	-2.40074	-0.515565	0.722812	2.45827
1	Fc1cc2/C(=C/c3c(C)c(C(=O)NCCN(CC)CC)c(C)[nH]3)/C(=O)Nc2cc1	2.64663	-118560	-897269	-42.2313	-8.41735	8.41735	-1.21021	63.2844	689.051	432.199	256.853	539.146	149.905	0	0	2	3	3	0	11	0	56	3	6	29	21	88.7224	1.58433	0	0	22	0	1	27	0	4	2	0	0	1.5433	-2.68178	-0.485166	0.490148	2.57548	-2.79135	-0.358734	0.569292	2.52059
1	O=C(N(CCN(C)C)Cc1ccc(C(=O)Nc2cc(Nc3nc(-c4cnccc4)ccn3)c(C)cc2)cc1)c1cnccc1	1.81961	-164053	-1680062	135.08	-8.72959	8.72959	-0.61366	92.915	795.451	564.067	228.703	655.149	140.302	0	0	3	5	7	0	30	0	78	2	9	44	31	118.314	1.51684	0	0	34	0	0	34	0	8	2	0	0	1.04988	-2.64524	-0.598799	0.654783	2.54955	-2.74218	-0.507538	0.741281	2.50992
1	O(CC)c1ccc(N(C)c2nc(C)nc3oc(C)cc23)cc1	4.78615	-85255.8	-599158	35.973	-8.48179	8.48179	-0.322	47.4931	565.334	394.563	167.809	480.172	85.1615	0	0	1	2	3	0	15	0	41	0	3	22	13	62.7073	1.52945	0	0	17	0	0	19	0	3	2	0	0	1.60568	-2.41097	-0.507965	0.460026	2.36152	-2.40985	-0.4667	0.620102	2.4676
1	O=C(NCCCCc1ccccc1)Nc1ccc(-c2c3c(C)n[nH]c3ncc2)cc1	4.86923	-109998	-828968	96.7533	-8.72021	8.72021	-0.38937	65.2118	731.075	488.475	237.177	587.079	143.996	0	0	4	5	4	0	21	0	55	5	9	30	22	80.2296	1.45872	0	0	24	0	0	25	0	5	1	0	0	1.08797	-2.61417	-0.643504	0.697291	2.56118	-2.67369	-0.53808	0.805915	2.63528
1	O=C(Nc1cc(N(CC)CC)ccc1)Nc1ccc(-c2c3c(C)n[nH]c3ncc2)cc1	4.87622	-115066	-911490	121.525	-8.75374	8.75374	-0.35738	66.9786	722.204	486.616	231.013	531.724	190.48	0	0	4	5	4	0	21	0	57	5	9	31	22	84.7144	1.48622	0	0	24	0	0	26	0	6	1	0	0	1.20216	-2.59611	-0.546718	0.639848	2.49348	-2.63826	-0.431248	0.727122	2.51941
1	Brc1cc(NC(=O)Nc2ccc(-c3c4c(C)n[nH]c4ncc3)cc2)ccc1	2.83424	-103455	-720109	126.226	-8.97805	8.97805	-0.33772	55.2207	646.287	347.533	293.895	507.638	138.649	0	0	4	4	4	0	21	0	43	5	9	27	19	71.2812	1.6577	0	1	20	0	0	16	0	5	1	0	0	1.21978	-2.32007	-0.643504	0.691174	2.28074	-2.40251	-0.494131	0.805915	2.44287
1	O=C(N(C)c1ccc(N=C(c2ccccc2)C2C(=O)Nc3c2ccc(C(=O)NCC)c3)cc1)CN(C)C	6.15958	-141439	-1.25472e+06	25.1492	-8.58103	8.58103	-0.2812	79.6166	833.167	583.063	250.103	672.09	161.077	0	0	3	4	5	0	18	0	68	2	7	37	25	103.121	1.51649	0	0	29	0	0	31	0	5	3	0	0	1.38988	-2.55601	-0.564903	0.577731	2.51832	-2.69162	-0.514933	0.660866	2.53039
1	ClCc1ccc(C(=O)Nc2cc(Nc3nc(-c4cnccc4)ccn3)c(C)cc2)cc1	4.27682	-117032	-929799	100.009	-8.52211	8.52211	-0.53189	64.0579	679.999	396.576	278.742	519.872	160.127	0	0	3	4	4	0	24	0	51	2	6	31	23	81.2064	1.59228	0	0	24	1	0	20	0	5	1	0	0	1.23839	-2.35334	-0.639416	0.673754	2.30733	-2.31035	-0.547747	0.769038	2.46552
1	Fc1cc(Nc2nc(N(C)c3cc4nn(C)cc4cc3)ccn2)ccc1	4.29498	-101204	-708202	156.55	-8.36675	8.36675	-0.34116	51.9325	612.299	407.891	199.189	528.246	84.0533	0	0	2	3	3	0	21	0	43	1	4	26	18	67.6221	1.57261	0	0	19	0	1	17	0	6	0	0	0	1.28449	-2.38458	-0.690656	0.683321	2.31894	-2.40067	-0.542079	0.748945	2.43319
1	O=C(N1Cc2c([nH]c(/C=C/3\C(=O)Nc4c\3cc(OC)cc4)c2)CC1)N1CCOCC1	4.14968	-121172	-932632	-28.1168	-8.16402	8.16402	-0.93305	62.331	679.533	506.062	173.471	553.016	126.517	0	0	2	3	4	0	11	0	54	2	6	30	20	86.6173	1.60402	0	0	22	0	0	24	0	4	4	0	0	1.16005	-2.6895	-0.47987	0.477762	2.63981	-2.81145	-0.404982	0.577052	2.5952
1	Oc1ccc(Nc2nc(NC3CCC(N)CC3)nc3n(CCC(C)C)cnc23)cc1	3.16546	-115579	-983792	49.8731	-8.10317	8.10317	-0.06472	67.8926	719.84	537.799	182.041	494.309	225.531	0	0	4	5	5	0	15	0	61	4	9	30	18	90.4359	1.48256	0	0	22	0	0	31	0	7	1	0	0	1.38988	-2.79811	-0.621638	0.643735	2.74563	-2.8347	-0.53808	0.728312	2.78762
1	Clc1cc(Nc2nc(NC3CCC(N)CC3)nc3n(CCCC)cnc23)ccc1	3.24364	-112900	-934350	90.0287	-8.3274	8.3274	-0.27399	65.5102	695.357	492.586	202.771	537.96	157.397	0	0	3	4	4	0	15	0	57	3	7	29	18	85.9786	1.5084	0	0	21	1	0	28	0	7	0	0	0	1.39843	-2.79811	-0.595879	0.641667	2.74562	-2.8347	-0.512743	0.739312	2.78761
1	S(=O)(=O)(N(CCN(C)C)c1ccc(N=C(c2ccccc2)C2C(=O)Nc3c2ccc(C(=O)N(CC)C)c3)cc1)C	3.8197	-157520	-1.49936e+06	30.2118	-9.11123	9.11123	-0.81246	87.7458	877.903	604.176	273.727	702.763	175.14	0	0	3	5	6	0	18	0	75	1	7	40	27	120.82	1.61094	0	0	30	0	0	35	0	5	4	0	1	1.41686	-2.65174	-0.537987	0.551657	2.57043	-2.76609	-0.467067	0.629862	2.53403
1	Clc1ccc(Nc2nc(NC3CCC(N)CC3)nc3n(CCCCCC)cnc23)cc1	3.65581	-120088	-1017622	78.0354	-8.30702	8.30702	-0.2982	71.6974	776.444	551.172	225.273	614.629	161.815	0	0	3	4	4	0	15	0	63	3	7	31	20	92.8752	1.47421	0	0	23	1	0	32	0	7	0	0	0	1.36315	-2.79811	-0.588654	0.646952	2.74562	-2.8347	-0.541992	0.760479	2.78764
1	O=C(NCc1sccc1)Nc1ccc(-c2c3c(C)n[nH]c3ncc2)cc1	5.13834	-97155.9	-683781	120.349	-8.85049	8.85049	-0.30483	53.9775	624.298	370.663	249.013	477.731	146.566	0	0	4	5	4	0	20	0	43	5	9	26	18	71.5223	1.66331	0	0	19	0	0	17	0	5	1	0	1	1.20053	-2.39498	-0.607482	0.702532	2.33511	-2.52852	-0.487679	0.805915	2.44671
1	O=C(N(CCN(C)C)c1ccc(N=C(c2ccccc2)C2C(=O)Nc3c2ccc(C(=O)N(CC)C)c3)cc1)C	6.60106	-148611	-1.39989e+06	27.2176	-8.73559	8.73559	-0.32149	85.8038	836.645	580.259	256.386	679.343	157.302	0	0	3	4	5	0	18	0	74	1	6	39	27	110.03	1.48689	0	0	31	0	0	35	0	5	3	0	0	1.40465	-2.62728	-0.54408	0.563992	2.53217	-2.74213	-0.45725	0.656755	2.53287
1	N(c1nc(NC2CCC(N)CC2)nc2n(CCCC)cnc12)c1ccccc1	3.49154	-104594	-864373	98.7902	-8.1532	8.1532	-0.08969	63.997	684.624	516.457	168.167	523.929	160.695	0	0	3	4	4	0	15	0	57	3	7	28	17	79.7031	1.3983	0	0	21	0	0	29	0	7	0	0	0	1.39129	-2.79811	-0.5899	0.645855	2.74562	-2.8347	-0.542001	0.708857	2.78761
1	O=C(Nc1ccc(N=C(c2ccccc2)C2C(=O)Nc3c2ccc(C(=O)OC)c3)cc1)CN1CCN(C)CC1	6.96353	-151788	-1.34712e+06	-17.8617	-8.52557	8.52557	-0.58182	82.1786	867.272	618.298	248.975	714.187	153.085	0	0	3	4	6	0	18	0	70	2	8	39	26	108.653	1.55219	0	0	30	0	0	31	0	5	4	0	0	1.14664	-2.76656	-0.57296	0.57747	2.66734	-2.89496	-0.53808	0.692099	2.54174
1	O=C(NCCCCC)Nc1ccc(-c2c3c(C)n[nH]c3ncc2)cc1	5.96216	-94616.7	-676159	60.9435	-8.64722	8.64722	-0.43656	55.0782	636.505	452.435	179.31	469.729	166.777	0	0	4	5	4	0	15	0	48	5	9	25	17	71.716	1.49408	0	0	19	0	0	23	0	5	1	0	0	1.39791	-2.63901	-0.533315	0.654663	2.57678	-2.67163	-0.441402	0.711722	2.69833
1	O(C)c1c(OC)cc(N(C)c2nc(C)nc3oc(C)cc23)cc1OC	5.29117	-103604	-777751	-27.6299	-8.46632	8.46632	-0.31519	52.1907	617.077	499.137	114.561	549.995	67.0821	0	0	3	4	5	0	15	0	46	0	5	25	14	74.0316	1.60938	0	0	18	0	0	21	0	3	4	0	0	1.73978	-2.39924	-0.450916	0.338941	2.35938	-2.40222	-0.438239	0.487622	2.52595
1	Clc1c(N)nccc1Oc1c(F)cc(NC(=O)C2(C(=O)Nc3ccc(F)cc3)CC2)cc1	4.22953	-142534	-1010245	-64.0202	-8.89468	8.89468	-0.44138	60.1555	713.524	369.551	343.972	536.879	176.645	0	0	2	4	3	0	18	0	49	3	6	32	22	92.7715	1.8933	0	0	22	1	2	17	0	4	3	0	0	1.23279	-2.33663	-0.664444	0.691259	2.84294	-2.48478	-0.569272	0.805915	2.84813
1	O=C(Nc1ccc(C(=O)Nc2cc(Nc3nc(-c4cnccc4)ccn3)c(C)cc2)cc1)C=C	5.05565	-127088	-1.05567e+06	123.548	-8.44733	8.44733	-0.46898	68.6334	719.747	423.779	292.428	535.239	184.508	0	0	3	5	5	0	24	0	56	3	8	34	23	87.3832	1.56041	0	0	26	0	0	22	0	6	2	0	0	1.20744	-2.3529	-0.639101	0.689121	2.30383	-2.32279	-0.553379	0.787476	2.46225
1	Fc1cc2/C(=C/c3c(C)c(NC(=O)[C@@H]4NCCC4)c(C)[nH]3)/C(=O)Nc2cc1.Cl	3.31657	-119704	-853225	-62.9355	-8.18774	8.18774	-1.10131	58.6104	685.027	383.205	301.822	466.544	218.483	0	0	3	4	3	0	11	0	50	4	7	28	19	87.6468	1.75294	0	0	20	1	1	22	0	4	2	0	0	1.40204	-2.47053	-0.588097	0.591625	2.69246	-2.67332	-0.491386	0.712618	2.66007
1	O=C(N(CCCN(C)C)c1ccc(N=C(c2ccccc2)C2C(=O)Nc3c2ccc(C(=O)N(CC)C)c3)cc1)C	7.8332	-152204	-1.45819e+06	48.3123	-8.73761	8.73761	-0.36586	88.8973	875.974	609.972	266.002	717.717	158.258	0	0	3	4	5	0	18	0	77	1	6	40	28	113.428	1.47309	0	0	32	0	0	37	0	5	3	0	0	1.38814	-2.65479	-0.544042	0.563991	2.56935	-2.71801	-0.457153	0.65668	2.54666
1	O=C(Nc1ccc(N(CC)CC)cc1)Nc1ccc(-c2c3c(C)n[nH]c3ncc2)cc1	4.05473	-115067	-908935	122.917	-8.6803	8.6803	-0.3917	66.9786	725.884	489.797	230.657	530.323	195.561	0	0	4	5	4	0	21	0	57	5	9	31	22	84.7144	1.48622	0	0	24	0	0	26	0	6	1	0	0	1.16753	-2.59598	-0.557976	0.654771	2.49267	-2.63807	-0.44219	0.739555	2.51721
1	Clc1cc(NC(=O)Nc2ccc(-c3c4c(C)n[nH]c4ncc3)cc2)ccc1	2.74772	-103928	-721409	113.936	-8.85488	8.85488	-0.5034	54.3507	632.64	353.98	274.094	492.491	140.149	0	0	4	4	4	0	21	0	43	5	9	27	19	71.2812	1.6577	0	0	20	1	0	16	0	5	1	0	0	1.21978	-2.31963	-0.643504	0.689214	2.28086	-2.40242	-0.495502	0.805915	2.44286
1	ClC(C(=O)Nc1ccc(C(=O)Nc2cc(Nc3nc(-c4cnccc4)ccn3)c(C)cc2)cc1)C	4.87754	-136053	-1.12591e+06	65.6948	-8.54813	8.54813	-0.56193	71.4802	777.972	450.427	323.923	564.924	213.048	0	0	3	5	5	0	24	0	58	3	8	35	24	95.9998	1.65517	0	0	26	1	0	23	0	6	2	0	0	1.20231	-2.38499	-0.638046	0.660819	2.43867	-2.48212	-0.53808	0.750599	2.46252
1	Clc1cc(Nc2nc(NC3CCC(N)CC3)nc3n(CC=C(C)C)cnc23)ccc1	3.75165	-115835	-963447	112.525	-8.29769	8.29769	-0.23796	67.2702	704.551	479.186	225.366	550.047	154.504	0	0	3	4	4	0	15	0	58	3	7	30	19	87.398	1.50686	0	0	22	1	0	28	0	7	0	0	0	1.40144	-2.7981	-0.561683	0.618702	2.74562	-2.8347	-0.494193	0.708767	2.7876
1	Clc1cc(Nc2nc(NC3CCC(N)CC3)nc3n(CCCCCC)cnc23)ccc1	3.338	-120088	-1.02569e+06	76.432	-8.3279	8.3279	-0.25642	71.6974	760.135	549.808	210.327	599.619	160.516	0	0	3	4	4	0	15	0	63	3	7	31	20	92.8752	1.47421	0	0	23	1	0	32	0	7	0	0	0	1.37356	-2.79811	-0.595878	0.641666	2.74562	-2.8347	-0.512735	0.739253	2.78764
1	O(C)c1cc2c(n(-c3nc(C)nc4oc(C)cc34)cc2)cc1	1.53527	-83958.8	-565329	78.2841	-8.31608	8.31608	-0.88197	44.8259	542.443	328.247	204.628	460.108	82.3352	0	0	1	1	3	0	18	0	37	0	3	22	13	57.9047	1.56499	0	0	17	0	0	15	0	3	2	0	0	1.49782	-2.24227	-0.57586	0.512921	2.28694	-2.24261	-0.520954	0.654614	2.42514
1	O=C1/C(=C\c2c(C)cc(C)[nH]2)/c2c(N1)cccc2	0.949023	-65631.7	-410960	45.3821	-8.0335	8.0335	-0.84137	38.7371	468.338	268.28	200.058	392.928	75.4101	0	0	1	1	1	0	11	0	32	2	3	18	14	46.0937	1.44043	0	0	15	0	0	14	0	2	1	0	0	1.65341	-2.22732	-0.505684	0.564643	2.36478	-2.21104	-0.411805	0.6465	2.47794
1	S=C(NCc1cc2OCOc2cc1)N1CCN(c2ncnc3c2cc(OC)c(OC)c3)CC1	3.97774	-133667	-1.08258e+06	3.64479	-8.33895	8.33895	-0.81928	68.7578	757.477	574.522	179.765	546.966	210.511	0	0	2	3	7	0	16	0	58	1	8	33	19	100.015	1.7244	0	0	23	0	0	25	0	5	4	0	1	1.07933	-2.72415	-0.558284	0.556285	2.63505	-2.86775	-0.556029	0.655209	2.53457
1	Fc1c(Oc2c3c(ncc2)cc(OCCCN2CCCCC2)c(OC)c3)ccc(NC(=O)N/N=C/c2c(O)c(CC=C)ccc2)c1	4.32492	-187306	-1.61896e+06	-55.8196	-8.56606	8.56606	-0.52627	97.0051	1054.74	742.999	306.319	846.537	208.202	0	0	3	5	7	0	22	0	84	3	10	46	34	134.789	1.60463	0	0	35	0	1	38	0	5	5	0	0	1.00105	-2.78855	-0.64919	0.677834	2.69739	-2.79899	-0.528511	0.770898	2.74477
1	O=C(Nc1cc(N2CCN(C)CC2)ccc1)Nc1ccc(-c2c3c(C)n[nH]c3ncc2)cc1	4.61769	-123101	-1.01508e+06	169.681	-8.49954	8.49954	-0.50654	70.5054	742.648	541.584	196.772	590.822	151.826	0	0	4	5	5	0	21	0	60	5	10	33	23	90.2836	1.50473	0	0	25	0	0	27	0	7	1	0	0	1.04238	-2.74725	-0.546916	0.639884	2.64165	-2.86969	-0.433393	0.727074	2.54956
1	P(=O)(C)(C)c1ccc(Nc2ncnc3n(/C=C/c4c(C)cccc4C)cnc23)cc1	7.36532	-109695	-856086	70.3143	-8.84982	8.84982	-0.89778	66.415	730.535	462.12	268.414	568.784	161.75	0	0	3	4	4	0	21	0	54	1	5	30	19	85.0733	1.57543	0	0	23	0	0	24	0	5	1	1	0	1.26657	-2.5339	-0.648394	0.660801	2.5088	-2.48779	-0.544051	0.756092	2.68988
1	Clc1c(C(F)(F)F)cc(NC(=O)Nc2ccc(Oc3ncnc4n[nH]cc34)cc2)cc1	9.98367	-145413	-948498	-35.086	-9.03841	9.03841	-0.71791	53.4965	672.547	308.049	359.201	348.34	324.207	0	0	4	5	5	0	21	0	43	4	9	31	19	87.3345	2.03104	0	0	19	1	3	12	0	6	2	0	0	1.1699	-2.31841	-0.637133	0.706876	2.37237	-2.40342	-0.53808	0.833603	2.49541
1	S=C(NCc1ccccc1)N1CCN(c2ncnc3c2cc(OC)c(OC)c3)CC1	4.07818	-115953	-935141	62.0864	-8.29187	8.29187	-0.80819	65.3938	721.858	527.335	191.619	565.103	156.756	0	0	3	4	5	0	16	0	55	1	6	30	19	90.1612	1.6393	0	0	22	0	0	25	0	5	2	0	1	1.25729	-2.72419	-0.562476	0.575622	2.635	-2.86775	-0.53808	0.674928	2.53073
1	O=C1NCc2c3c(n(CC(C)C)c4c3cc(Nc3ncccn3)cc4)c3c(c12)-c1c(nn(C)c1)CC3	3.00385	-131943	-1205996	189.793	-8.07976	8.07976	-0.4786	75.7854	740.713	544.68	186.244	547.169	193.544	0	0	3	4	4	0	24	0	63	2	6	36	26	93.9293	1.49094	0	0	28	0	0	27	0	7	1	0	0	1.20617	-2.61333	-0.577617	0.594493	2.57038	-2.49663	-0.497125	0.662838	2.69159
1	O=C(C)N1Cc2c([nH]c(/C=C/3\C(=O)Nc4c\3cc(OC)cc4)c2)CC1	5.26302	-98571.6	-690125	-16.9255	-8.21982	8.21982	-0.98256	51.8151	599.163	409.836	189.328	469.128	130.035	0	0	1	1	3	0	11	0	44	2	5	25	17	69.284	1.57464	0	0	19	0	0	19	0	3	3	0	0	1.36229	-2.61393	-0.525066	0.507693	2.57822	-2.65151	-0.455825	0.587572	2.59339
1	O=C(N)c1c(NC(C)C)c2c(nn1)cc(N1CCOCC1)cc2	3.23197	-92528.8	-666594	-1.52525	-8.78723	8.78723	-0.99092	49.2667	539.266	375.567	161.165	327.151	212.115	0	0	2	3	4	0	10	0	44	2	6	23	15	70.3667	1.59924	0	0	16	0	0	21	0	5	2	0	0	1.65603	-2.66484	-0.451152	0.459993	2.59827	-2.78114	-0.381125	0.54232	2.54036
1	Fc1cc(NC(=O)Nc2ccc(-c3c4c(C)n[nH]c4ncc3)cc2)ccc1	2.5371	-106495	-727452	75.8067	-8.89425	8.89425	-0.50065	52.7277	610.167	363.365	241.656	472.102	138.066	0	0	4	4	4	0	21	0	43	5	9	27	19	71.2812	1.6577	0	0	20	0	1	16	0	5	1	0	0	1.21978	-2.31813	-0.643504	0.684653	2.28141	-2.40333	-0.515843	0.805915	2.4426
1	O(C)c1cc(OC)cc(Nc2nc(NC3CCC(N)CC3)nc3n(CCC(C)C)cnc23)c1	3.5455	-130133	-1.14945e+06	18.7282	-8.24553	8.24553	-0.15211	74.8818	776.351	624.6	151.751	598.282	178.069	0	0	3	4	6	0	15	0	68	3	9	33	20	102.732	1.51076	0	0	24	0	0	35	0	7	2	0	0	1.42246	-2.79811	-0.559394	0.545858	2.74563	-2.8347	-0.526499	0.627858	2.78762
1	O(C)c1c(OC)cc2ncc(NC3CCC(O)CC3)nc2c1	2.28437	-90385.5	-617829	-71.9508	-8.54447	8.54447	-0.59808	47.8687	557.28	448.818	108.462	440.786	116.494	0	0	2	3	5	0	10	0	43	2	7	22	15	67.5809	1.57165	0	0	16	0	0	21	0	3	3	0	0	1.50533	-2.78044	-0.564321	0.574277	2.74573	-2.76672	-0.555323	0.561424	2.79163
1	O=C(N)c1c(N)c2c(CCC)cc(N3CCNCC3)nc2s1	3.61763	-86702.4	-622372	5.37354	-8.03897	8.03897	-0.63501	49.6047	554.204	405.935	142.852	331.962	222.242	0	0	1	3	3	0	9	0	43	3	6	22	14	70.8777	1.64832	0	0	15	0	0	21	0	5	1	0	1	1.73266	-2.70777	-0.567193	0.533334	2.61652	-2.88824	-0.407878	0.667928	2.60596
1	O=C(Nc1c(C)cccc1)Nc1ccc(-c2c3c(C)n[nH]c3ncc2)cc1	4.12514	-99218.3	-726815	113.758	-8.78523	8.78523	-0.45154	55.9311	626.453	388.404	233.384	497.591	128.863	0	0	4	4	4	0	21	0	46	5	9	27	19	69.5249	1.51141	0	0	21	0	0	19	0	5	1	0	0	1.23051	-2.35503	-0.53939	0.630963	2.29701	-2.40922	-0.428623	0.725919	2.44553
1	O=C(Nc1ccc(N(C)C)cc1)Nc1ccc(-c2c3c(C)n[nH]c3ncc2)cc1	5.23805	-107884	-813911	131.415	-8.07315	8.07315	-0.35809	60.7914	677.026	473.337	198.41	536.999	140.027	0	0	4	5	4	0	21	0	51	5	9	29	20	77.5689	1.52096	0	0	22	0	0	22	0	6	1	0	0	1.18407	-2.47418	-0.564108	0.654773	2.35068	-2.53785	-0.479892	0.740307	2.44419
1	O=C(Nc1cnccc1)Nc1ccc(-c2c3c(C)n[nH]c3ncc2)cc1	2.32264	-97123.6	-679759	130.323	-8.89145	8.89145	-0.52124	51.5107	596.005	404.246	187.464	438.36	157.644	0	0	4	4	5	0	21	0	42	5	10	26	17	66.2569	1.57755	0	0	19	0	0	16	0	6	1	0	0	1.22469	-2.314	-0.59974	0.673602	2.28018	-2.40321	-0.505486	0.770271	2.44241
1	O=C(N(CC)C)c1cc2NC(=O)C(C(=Nc3ccc(C(=O)NCCN(CC)CC)cc3)c3ccccc3)c2cc1	4.27802	-152213	-1.40115e+06	14.4005	-8.99249	8.99249	-0.68142	88.8973	908.882	614.625	294.258	702.082	206.8	0	0	3	4	5	0	18	0	77	2	7	40	28	113.428	1.47309	0	0	32	0	0	37	0	5	3	0	0	1.33712	-2.68179	-0.562361	0.583386	2.57437	-2.79119	-0.514463	0.661183	2.53174
1	O=C(NCC)c1cc2NC(=O)C(C(=Nc3ccc(C(=O)NCCN(CC)CC)cc3)c3ccccc3)c2cc1	5.58764	-148634	-1.33487e+06	4.62291	-9.10667	9.10667	-0.60629	85.8038	908.903	606.713	302.19	682.866	226.037	0	0	3	5	5	0	18	0	74	3	8	39	27	110.03	1.48689	0	0	31	0	0	35	0	5	3	0	0	1.32877	-2.68179	-0.575129	0.588547	2.57437	-2.79119	-0.535242	0.665517	2.52963
1	O=C(N(C)c1ccc(N=C(c2ccccc2)C2C(=O)Nc3c2ccc(C(=O)N(CC)C)c3)cc1)CN(C)C	6.358	-145019	-1.33652e+06	32.0578	-8.56986	8.56986	-0.24538	82.7102	843.525	604.95	238.575	696.368	147.157	0	0	3	4	5	0	18	0	71	1	6	38	26	106.596	1.50135	0	0	30	0	0	33	0	5	3	0	0	1.39632	-2.55601	-0.544274	0.563943	2.52097	-2.69162	-0.458122	0.656552	2.53246
1	O=C(NCC)c1cc2NC(=O)C(C(=Nc3ccc(CCN(C)C)cc3)c3ccccc3)c2cc1	4.72185	-126022	-1.08892e+06	40.7702	-8.98281	8.98281	-0.36714	75.2878	799.972	556.377	243.595	660.804	139.167	0	0	3	4	4	0	18	0	64	2	6	34	25	92.1873	1.44043	0	0	28	0	0	30	0	4	2	0	0	1.39424	-2.60765	-0.571815	0.578469	2.51874	-2.67729	-0.53808	0.691215	2.53123
1	N(C)c1nc2n(CC3CCCC3)nc(-c3ccc(N4CCN(C)CC4)cc3)c2cn1	0.497611	-111097	-936619	139.915	-8.2497	8.2497	-0.34461	68.8506	729.503	610.836	114.385	649.24	80.2631	0	0	3	4	4	0	15	0	61	1	5	30	21	84.5015	1.38527	0	0	23	0	0	31	0	7	0	0	0	1.19725	-2.74727	-0.548764	0.545741	2.75343	-2.86967	-0.464134	0.615271	2.89339
1	O=C(Nc1noc(C(C)(C)C)c1)Nc1ccc(-c2nc3SC=C(C(=O)NCCCN(C)C)n3c2)cc1	8.39431	-143594	-1.17155e+06	92.1238	-8.36752	8.36752	-0.67959	77.6766	863.188	544.768	318.42	629.824	233.364	0	0	3	5	5	0	16	0	67	3	8	36	21	112.345	1.67679	0	0	25	0	0	31	0	7	3	0	1	1.14299	-2.64776	-0.477347	0.623802	2.59902	-2.73362	-0.413384	0.696181	2.67355
1	O=C(NCc1occc1)Nc1ccc(-c2c3c(C)n[nH]c3ncc2)cc1	4.85712	-100042	-693848	95.6891	-8.77118	8.77118	-0.40546	51.8795	613.322	374.686	234.262	454.049	159.273	0	0	4	5	4	0	20	0	43	5	9	26	15	69.5223	1.6168	0	0	19	0	0	17	0	5	2	0	0	1.20053	-2.37634	-0.61341	0.702532	2.3615	-2.52986	-0.494636	0.805915	2.44384
1	Fc1c(Oc2c3c(ncc2)cc(OCCCN2CCC(C)CC2)c(OC)c3)ccc(NC(=O)NN=Cc2c(F)cc(F)cc2)c1	3.16884	-195129	-1.59397e+06	-120.627	-8.58369	8.58369	-0.81565	91.13	1016.17	686.32	323.898	866.356	149.811	0	0	3	4	6	0	22	0	79	2	8	45	34	134.195	1.69868	0	0	33	0	3	34	0	5	4	0	0	1.00136	-2.81514	-0.595482	0.619988	2.72926	-2.82081	-0.506272	0.763311	2.77357
1	FC(F)(F)c1cc(C(=O)Nc2cc(NC(=O)c3c4c(c(N)ncc4)ccc3)c(C)cc2)ccc1	4.41934	-147261	-1.08889e+06	-110.732	-8.59158	8.59158	-0.8021	64.3441	721.038	354.28	357.447	462.492	258.546	0	0	2	4	3	0	22	0	53	3	6	34	25	92.0179	1.73619	0	0	25	0	3	19	0	4	2	0	0	1.30584	-2.35928	-0.633413	0.666694	2.36659	-2.34431	-0.542234	0.736219	2.46864
1	FC(F)(F)c1cc(C(=O)Nc2cc(C#Cc3nn(C4CCN(C)CC4)c4ncnc(N)c34)c(C)cc2)ccc1	1.98189	-165197	-1.32448e+06	21.863	-8.58716	8.58716	-0.86505	76.7896	846.166	509.823	331.048	580.994	265.172	0	0	3	4	5	0	21	0	65	2	7	39	27	110.23	1.69585	0	0	28	0	3	26	0	7	1	0	0	1.14956	-2.76685	-0.60972	0.649463	2.70856	-2.77652	-0.520303	0.720022	2.75622
1	O=C(Nc1ncccc1)Nc1ccc(-c2c3c(C)n[nH]c3ncc2)cc1	3.13485	-97120.4	-680283	133.711	-8.83186	8.83186	-0.50526	51.5107	601.558	387.618	209.073	436.709	164.849	0	0	4	4	5	0	21	0	42	5	10	26	16	66.2569	1.57755	0	0	19	0	0	16	0	6	1	0	0	1.22469	-2.30724	-0.570039	0.654849	2.27984	-2.40401	-0.472614	0.752537	2.44223
1	O=C1c2c3c([nH]c2C(C)(C)c2c1ccc(C1CCN(CC4CCOCC4)CC1)c2)cc(C#N)cc3	7.08555	-128131	-1.14219e+06	9.68723	-8.90598	8.90598	-0.7565	79.7082	768.697	526.029	237.346	594.354	174.343	0	0	3	4	4	0	15	0	68	1	5	35	28	93.5209	1.37531	0	0	30	0	0	33	0	3	2	0	0	1.08677	-2.82887	-0.572185	0.602046	2.7573	-2.83753	-0.481422	0.684995	2.79106
1	S(=O)(=O)(N(CC(=O)N(C)C)c1ccc(N=C(c2ccccc2)C2C(=O)Nc3c2ccc(C(=O)N(CC)C)c3)cc1)C	0							87.2142	870.238	577.965	292.272	672.476	197.761	0	0	3	5	6	0	18	0	74	1	7	41	26	122.609	1.65687	0	0	30	0	0	33	0	5	5	0	1	1.42452	-2.55623	-0.549324	0.565553	2.5423	-2.70664	-0.480555	0.656051	2.53312
1	O=C(Nc1[nH]ncc1)Nc1ccc(-c2c3c(C)n[nH]c3ncc2)cc1	3.98916	-95644.1	-654634	177.641	-8.92247	8.92247	-0.58657	48.4239	568.771	368.252	195.093	377.447	191.325	0	0	4	5	6	0	20	0	40	7	13	25	14	65.1354	1.62839	0	0	17	0	0	15	0	7	1	0	0	1.23942	-2.30333	-0.643504	0.702532	2.28116	-2.40475	-0.53808	0.805915	2.44226
1	O(CC1CCNCC1)c1c(-c2cn(-c3ccc(N4CCN(C)CC4)cc3)nc2)ccnc1	4.36215	-119925	-1.04362e+06	108.965	-8.32999	8.32999	-0.33309	72.7394	718.856	589.308	129.548	629.245	89.6104	0	0	3	4	5	0	17	0	64	1	6	32	25	92.3938	1.44365	0	0	25	0	0	32	0	6	1	0	0	1.07291	-2.77222	-0.591948	0.63492	2.71422	-2.86969	-0.53808	0.696781	2.72014
1	O=C(N(CC)C)c1cc2NC(=O)C(C(=Nc3ccc(CCN(C)C)cc3)c3ccccc3)c2cc1	4.04022	-129602	-1.16617e+06	47.8926	-8.97777	8.97777	-0.36237	78.3814	795.522	568.125	227.398	673.937	121.585	0	0	3	4	4	0	18	0	67	1	5	35	26	95.5465	1.42607	0	0	29	0	0	32	0	4	2	0	0	1.40059	-2.60765	-0.547136	0.57645	2.52131	-2.67729	-0.472959	0.691202	2.53321
1	O=C(Nc1noc(C(C)(C)C)c1)Nc1ccc(-n2nc(-c3ccc(OCCN4CCOCC4)cc3)c3c(N)ncnc23)cc1	6.50238	-175003	-1525537	106.985	-8.36492	8.36492	-0.41936	91.0058	985.042	686.262	294.859	694.184	290.858	0	0	3	5	8	0	26	0	79	3	11	44	25	128.364	1.62487	0	0	31	0	0	35	0	9	4	0	0	0.948094	-2.71731	-0.527273	0.703985	2.64136	-2.83794	-0.473038	0.765329	2.67355
1	O(C)c1cc2[nH]c(C(c3ccccc3)=C3C(=O)Nc4c3cc(NC3CN(CC)CCC3)cc4)nc2cc1	4.76148	-136985	-1.27377e+06	87.1991	-8.0452	8.0452	-0.9344	80.5746	784.098	553.956	230.142	638.31	145.788	0	0	4	5	5	0	21	0	68	4	9	37	28	99.551	1.46399	0	0	30	0	0	31	0	5	2	0	0	1.18003	-2.79825	-0.610441	0.610721	2.7148	-2.85741	-0.528022	0.684763	2.70485
1	O(C)c1cc(O)c2C(=O)O[C@@H](C)C/C=C\C(=O)CCCCCc2c1	1.75954	-100675	-753115	-190.051	-9.28744	9.28744	-0.35801	53.453	555.229	369.335	185.893	416.688	138.54	0	0	3	4	4	0	6	0	48	1	5	24	17	65.7188	1.36914	0	0	19	0	0	24	0	0	5	0	0	2.03834	-2.63351	-0.55179	0.465328	2.60075	-2.53408	-0.474744	0.529118	2.72671
1	O(C)c1cc(O)c2C(=O)O[C@@H](C)C/C=C\C(=O)CCC/C=C\c2c1	2.28857	-100015	-746163	-157.128	-9.31004	9.31004	-0.44794	52.1194	535.358	363.461	171.898	402.135	133.223	0	0	3	4	4	0	6	0	46	1	5	24	17	63.6561	1.38383	0	0	19	0	0	22	0	0	5	0	0	2.03929	-2.54455	-0.607173	0.557338	2.54046	-2.51788	-0.515524	0.631289	2.64339
1	Oc1ccc(Nc2nc(NC3CCC(N)CC3)nc3n(CCCCCC)cnc23)cc1	3.54192	-119175	-1.00635e+06	43.4006	-8.13207	8.13207	-0.08932	70.9862	759.972	579.81	180.161	551.145	208.827	0	0	4	5	5	0	15	0	64	4	9	31	19	93.8416	1.46627	0	0	23	0	0	33	0	7	1	0	0	1.36315	-2.79811	-0.639985	0.699537	2.74562	-2.8347	-0.549814	0.73842	2.78764
1	O=C(NCc1ncccc1)Nc1ccc(-c2c3c(C)n[nH]c3ncc2)cc1	5.72772	-100716	-717828	124.809	-8.69129	8.69129	-0.39352	54.6043	632.104	421.48	205.415	474.223	157.881	0	0	4	5	5	0	21	0	45	5	10	27	18	70.1264	1.55836	0	0	20	0	0	18	0	6	1	0	0	1.18582	-2.39255	-0.568545	0.654688	2.34748	-2.53419	-0.472626	0.729438	2.44319
1	O=C(N(CCCN(C)C)c1ccc(N=CC2C(=O)Nc3c2ccc(C(=O)NCC)c3)cc1)C	2.54701	-129652	-1.04289e+06	-15.3997	-9.08514	9.08514	-0.48625	72.5766	816.684	561.805	254.879	623.88	192.804	0	0	3	4	5	0	12	0	64	2	7	33	21	97.959	1.53061	0	0	25	0	0	31	0	5	3	0	0	1.41529	-2.65479	-0.549162	0.535332	2.56932	-2.71801	-0.469944	0.599904	2.54506
1	Fc1ccc(NC(NC#N)Nc2ccc(Oc3c4c(ncc3)cc(OC)c(OC)c4)cc2)cc1	4.97481	-137918	-1.06389e+06	25.0385	-8.72911	8.72911	-0.44773	67.1324	761.603	482.574	273.025	624.68	136.923	0	0	3	4	4	0	22	0	56	3	7	34	24	94.6434	1.69006	0	0	25	0	1	22	0	5	3	0	0	1.22265	-2.49628	-0.625715	0.675982	2.41564	-2.71166	-0.539955	0.788088	2.47552
1	O=C(Nc1noc(C2CC2)c1)n1c2c(cc(Oc3ncnc4c3C[C@H](C)N(C(=O)C)C4)cc2)cc1	5.80512	-139463	-1.10958e+06	98.8491	-8.99193	8.99193	-0.39671	69.811	779.767	467.752	306.72	523.836	255.931	0	0	3	4	5	0	20	0	59	1	6	35	19	97.4307	1.65137	0	0	25	0	0	24	0	6	4	0	0	0.995745	-2.66962	-0.625937	0.666865	2.75692	-2.70328	-0.538951	0.688916	2.89389
1	O=C(N1Cc2c([nH]c(/C=C/3\C(=O)Nc4c\3cc(OC)cc4)c2)CC1)c1c(C)onc1	5.74581	-119838	-899323	32.477	-8.27112	8.27112	-1.01805	59.6639	660.26	426.943	233.317	517.672	142.587	0	0	3	4	4	0	16	0	50	2	6	30	19	81.6468	1.63294	0	0	22	0	0	20	0	4	4	0	0	1.17126	-2.60259	-0.525067	0.508124	2.57544	-2.6409	-0.455825	0.587655	2.58977
1	O=C(Nc1ccc(-c2nc(Nc3ccc(N4CCOCC4)cc3)ncc2)cc1)[C@@H]1NCCC1	3.40154	-126080	-989068	43.744	-8.26411	8.26411	-0.39912	70.8742	774.45	571.364	198.791	642.848	131.602	0	0	3	4	5	0	18	0	61	3	8	33	23	93.5629	1.53382	0	0	25	0	0	28	0	6	2	0	0	1.00711	-2.6656	-0.64245	0.70276	2.6918	-2.78123	-0.53808	0.805915	2.65936
1	O=C(Nc1ccccc1)c1c2c(cc(-c3c4c(N)ncnc4sc3)cc2)ccc1	4.30323	-103902	-789466	106.445	-8.61682	8.61682	-0.98794	59.2507	643.249	332.874	296.408	483.494	159.755	0	0	2	2	3	0	25	0	45	2	5	29	21	71.0915	1.57981	0	0	23	0	0	16	0	4	1	0	1	1.20223	-2.28964	-0.674661	0.719737	2.26484	-2.31954	-0.578832	0.817985	2.46118
1	O=C(Nc1cc(C)ccc1)Nc1ccc(-c2c3c(C)n[nH]c3nc(O)c2)cc1	3.88705	-106611	-772595	70.0916	-8.7817	8.7817	-0.46014	56.7331	644.408	390.48	248.977	444.67	199.738	0	0	4	5	5	0	21	0	47	6	11	28	18	74.5067	1.58525	0	0	21	0	0	19	0	5	2	0	0	1.24077	-2.34277	-0.624742	0.68372	2.29027	-2.40471	-0.518984	0.744725	2.45393
1	O=C(O)c1ccc(N=C(c2ccccc2)C2C(=O)Nc3c2ccc(C(=O)N(CC)C)c3)cc1	3.07006	-127902	-1.05588e+06	-27.0514	-9.15801	9.15801	-0.81192	67.6042	707.877	434.436	273.441	492.763	215.114	0	0	3	5	5	0	18	0	56	3	8	33	22	86.2036	1.53935	0	0	26	0	0	23	0	3	4	0	0	1.44516	-2.53768	-0.628224	0.678452	2.52085	-2.61137	-0.53314	0.771418	2.53164
1	O=C(Nc1ccc(-c2c3c(C)n[nH]c3ncc2)cc1)NC1CCCC1	5.19931	-93976.1	-678874	72.0095	-8.84476	8.84476	-0.26093	53.7447	602.963	421.674	176.452	465.826	137.137	0	0	4	5	4	0	15	0	46	5	9	25	17	69.5249	1.51141	0	0	19	0	0	21	0	5	1	0	0	1.23897	-2.55449	-0.581375	0.639727	2.73546	-2.68652	-0.508963	0.739686	2.82297
1	Oc1cc2c3c(C)c4c(c(C)c3[nH]c2cc1)ccnc4	1.80837	-71546.1	-478726	41.398	-8.17411	8.17411	-0.86346	42.2571	464.216	272.681	170.373	384.125	80.0912	0	0	1	1	2	0	17	0	34	2	4	20	17	48.1839	1.41717	0	0	17	0	0	14	0	2	1	0	0	1.63391	-2.30894	-0.572986	0.627984	2.31698	-2.14427	-0.432387	0.750238	2.51002
1	S(=O)(=O)(NCCOC)c1cc2C(=C(c3[nH]c4c(n3)cccc4)c3ccccc3)C(=O)Nc2cc1	3.01695	-133844	-1.14314e+06	14.5757	-9.00433	9.00433	-1.40854	69.1774	718.447	434.806	283.641	552.471	165.976	0	0	4	6	6	0	21	0	56	4	10	34	23	95.008	1.69657	0	0	25	0	0	22	0	4	4	0	1	1.35601	-2.53518	-0.642167	0.641137	2.50292	-2.71445	-0.567002	0.709978	2.48349
1	S(=O)(=O)(N(C)c1ccc(N=C(c2ccccc2)C2C(=O)Nc3c2ccc(C(=O)N(CC)C)c3)cc1)C	2.92257	-141667	-1250507	-5.11472	-9.10726	9.10726	-0.81417	76.6982	782.326	496.069	286.257	603.116	179.21	0	0	3	5	5	0	18	0	64	1	6	36	24	105.012	1.64081	0	0	27	0	0	28	0	4	4	0	1	1.42791	-2.53768	-0.567352	0.580134	2.52113	-2.62132	-0.523473	0.696685	2.53299
1	Nc1ncnc2n(C(C)(C)C)nc(-c3ccc(C)cc3)c12	2.25238	-77081.4	-556203	116.639	-8.66042	8.66042	-0.19019	46.3291	528.477	360.707	163.78	363.578	164.899	0	0	1	1	3	0	15	0	40	1	4	21	13	56.5569	1.41392	0	0	16	0	0	19	0	5	0	0	0	1.80232	-2.60809	-0.416504	0.513366	2.5886	-2.48243	-0.338316	0.582043	2.72915
1	FC(F)(F)c1c(CN2CCN(CC)CC2)ccc(NC(=O)CNc2ccc(-c3cnc(NC(=O)C4CC4)cc3)cc2)c1	3.21589	-179585	-1.48511e+06	-93.093	-8.50609	8.50609	-0.48867	87.7728	938.269	599.216	333.693	656.487	281.783	0	0	3	4	5	0	18	0	77	3	8	42	31	127.173	1.6516	0	0	31	0	3	35	0	6	2	0	0	0.972521	-2.7839	-0.52071	0.447774	2.77078	-2.88007	-0.486594	0.546079	2.84143
1	Fc1ccc(N2C(=O)C(C(=O)Nc3ccc(Oc4cc(C(=O)NCCC)ncc4)cc3)=Cc3c2nccc3)cc1	4.70039	-160729	-1330155	-22.2973	-8.77774	8.77774	-1.47796	78.068	876.226	544.098	332.128	725.669	150.557	0	0	3	5	5	0	24	0	64	2	7	40	27	107.145	1.67413	0	0	30	0	1	24	0	5	4	0	0	1.09823	-2.54176	-0.638739	0.684127	2.48187	-2.63251	-0.558898	0.805915	2.53124
1	Oc1cc2c([N+H]=C3C(C)=C4C(C(C)=C23)=CN(C)C=C4)cc1	10.6967	-75304.2	-528061	185.031	-11.0865	11.0865	-4.90378	46.0175	494.721	313.809	170.375	415.556	79.1641	1	1	0	0	1	0	6	2	38	1	2	21	17	52.8757	1.39147	0	0	18	0	0	17	0	2	1	0	0	1.62506	-2.46793	-0.580975	0.690563	2.49503	-2.88213	-0.529112	0.714577	2.56282
1	Brc1ccc(NC(=O)N2CCN(c3ncnc4c3cc(OC)c(OC)c4)CC2)cc1	2.24733	-123109	-943413	17.348	-8.87679	8.87679	-0.79662	62.5854	711.423	485.108	222.431	590.336	121.087	0	0	3	4	5	0	16	0	52	1	6	30	19	89.7122	1.72523	0	1	21	0	0	22	0	5	3	0	0	1.27962	-2.71186	-0.597437	0.556345	2.64464	-2.86146	-0.53808	0.758774	2.52922
1	O=C(Nc1ccc(-c2c3c(C)n[nH]c3ncc2)cc1)NC1CCC1	5.70392	-90365	-635832	96.1559	-8.71873	8.71873	-0.42315	50.6511	583.575	268.816	141.267	443.553	140.021	0	0	4	4	4	0	15	0	43	5	9	24	16	65.9505	1.53373	0	0	18	0	0	19	0	5	1	0	0	1.25	-2.79109	-0.576421	0.631779	2.74404	-2.81179	-0.500704	0.73114	2.80918
1	O=C(Nc1ccc(C#N)cc1)N1CCN(c2ncnc3c2cc(OC)c(OC)c3)CC1	4.15338	-122669	-958913	71.5125	-8.92894	8.92894	-0.82739	62.3954	703.058	519.636	179.661	505.906	197.152	0	0	2	3	6	0	16	0	53	1	7	31	18	87.1001	1.6434	0	0	22	0	0	22	0	6	3	0	0	1.26238	-2.71186	-0.624581	0.617722	2.64465	-2.86147	-0.55309	0.707675	2.52909
1	Clc1c([C@H](Oc2cc3c(-c4[nH]c5c(n4)cc(N4CCN(C)CC4)cc5)n[nH]c3cc2)C)c(Cl)cnc1	4.67619	-142624	-1.17398e+06	167.906	-8.15571	8.15571	-0.65222	75.2918	798.282	504.841	288.284	640.917	157.364	0	0	4	5	7	0	24	0	61	4	11	36	27	101.816	1.66911	0	0	26	2	0	25	0	7	1	0	0	1.0358	-2.7468	-0.654869	0.653315	2.64154	-2.86962	-0.398122	0.731583	2.58443
1	O=C(NCC)c1cc2NC(=O)C(C(=Nc3ccc(CN4CCCCC4)cc3)c3ccccc3)c2cc1	5.32562	-132574	-1.18792e+06	33.1538	-8.98639	8.98639	-0.32035	80.1414	803.136	550.259	252.878	658.594	144.543	0	0	3	4	4	0	18	0	68	2	6	36	27	96.7408	1.42266	0	0	30	0	0	32	0	4	2	0	0	1.2003	-2.77195	-0.619847	0.658376	2.68188	-2.74576	-0.53808	0.767796	2.75146
1	Clc1cc2C(c3c(F)cccc3F)=NCc3c(nc(Nc4ccc(C(=O)O)cc4)nc3)-c2cc1	2.4407	-143375	-1.09544e+06	-12.5739	-9.09168	9.09168	-0.9495	63.2999	700.052	352.891	347.161	537.418	162.634	0	0	3	4	5	0	24	0	49	3	8	34	25	88.421	1.80451	0	0	25	1	2	15	0	4	2	0	0	1.27649	-2.2797	-0.652776	0.674859	2.36174	-2.20313	-0.53808	0.827901	2.49123
1	O(Cc1ccccc1)c1cc(-c2c3c(N)ncnc3n(C3CC(CN4CCC4)C3)c2)ccc1	4.20306	-120083	-1.0255e+06	139.386	-8.24918	8.24918	-0.17172	73.159	772.524	363.758	190.85	620.322	152.203	0	0	3	4	4	0	21	0	62	1	5	33	24	88.2871	1.42399	0	0	27	0	0	29	0	5	1	0	0	1.05807	-2.87758	-0.616334	0.639927	2.8182	-2.88209	-0.514554	0.750408	2.90201
1	S(=O)(=O)(NCCCC)c1cc2C(=C(c3[nH]c4c(n3)cccc4)c3ccccc3)C(=O)Nc2cc1	2.73691	-130056	-1.13516e+06	40.1491	-9.02426	9.02426	-1.34904	71.469	726.573	417.689	308.884	550.021	176.551	0	0	4	6	5	0	21	0	58	4	9	34	24	94.7575	1.63375	0	0	26	0	0	24	0	4	3	0	1	1.35601	-2.62113	-0.648451	0.641429	2.55568	-2.68706	-0.581453	0.729126	2.63944
1	FC(F)(F)C(Oc1c(N)ncc(C2=Cn3c(nc(NC(=O)C)c3)C=C2)n1)C	3.49132	-128939	-854402	-99.872	-8.4203	8.4203	-0.74393	48.0369	604.217	333.766	270.451	292.555	311.662	0	0	2	3	4	0	11	0	42	2	6	27	14	81.6093	1.94308	0	0	16	0	3	15	0	6	2	0	0	1.54532	-2.42017	-0.592154	0.530323	2.59247	-2.55289	-0.563551	0.523622	2.48025
1	O=C(N(CC)C)c1cc2NC(=O)C(C(=Nc3ccc(CN4CCCCC4)cc3)c3ccccc3)c2cc1	4.8243	-136153	-1266316	40.8284	-8.99037	8.99037	-0.26997	83.235	798.001	561.245	236.756	670.371	127.63	0	0	3	4	4	0	18	0	71	1	5	37	28	100.078	1.40955	0	0	31	0	0	34	0	4	2	0	0	1.2049	-2.77195	-0.61176	0.657748	2.68188	-2.74576	-0.516453	0.767791	2.75146
1	FC(F)(F)c1c(CN2CCN(C)CC2)ccc(NC(=O)c2cc(C#Cc3nn(CC)c4ncnc(N)c34)c(C)cc2)c1	4.74733	-177456	-1.52357e+06	32.1919	-8.87496	8.87496	-0.99117	84.7436	893.164	593.8	294.427	622.539	270.625	0	0	3	4	6	0	21	0	73	2	8	42	29	122.316	1.67555	0	0	30	0	3	31	0	8	1	0	0	1.12106	-2.7713	-0.399795	0.398739	2.66179	-2.87102	-0.3591	0.523807	2.61053
1	O=[N+]([O-])c1ccc(NC(=O)N2CCN(c3ncnc4c3cc(OC)c(OC)c4)CC2)cc1	6.87183	-134438	-1.03446e+06	15.205	-9.02931	9.02931	-1.02965	62.2394	709.65	494.054	211.516	506.886	202.764	0	0	2	3	5	0	16	0	54	1	6	32	19	93.2983	1.72775	0	0	21	0	0	22	0	6	5	0	0	1.25208	-2.71184	-0.607691	0.5946	2.64469	-2.86146	-0.546028	0.694007	2.52931
1	Oc1cc(-c2c3c(N)ncnc3n(C3CC(CN4CCC4)C3)c2)ccc1	2.75085	-97531.9	-753798	102.719	-8.38255	8.38255	-0.19902	56.8382	619.103	277.494	123.028	427.271	191.833	0	0	3	4	4	0	15	0	49	2	6	26	17	73.0307	1.49042	0	0	20	0	0	23	0	5	1	0	0	1.25076	-2.87758	-0.592299	0.654195	2.8182	-2.88209	-0.487542	0.74892	2.90201
1	O=C(Nc1c(N2CCN(C)CC2)cccc1)Nc1ccc(-c2c3c(C)n[nH]c3ncc2)cc1	5.00048	-123102	-1.0287e+06	138.336	-8.74382	8.74382	-0.28159	70.5054	730.106	527.182	198.386	590.675	139.431	0	0	4	5	5	0	21	0	60	5	10	33	23	90.2836	1.50473	0	0	25	0	0	27	0	7	1	0	0	1.08304	-2.74712	-0.549754	0.619991	2.64326	-2.86975	-0.438484	0.725679	2.55646
1	O(C)c1c(OC)cc(C2=C(c3c4c([nH]c3)cccc4)C(=O)NC2=O)cc1OC	5.41511	-114129	-883140	-58.375	-8.3711	8.3711	-1.34007	55.1723	578.482	411.471	164.045	407.709	170.774	0	0	2	3	5	0	15	0	46	2	7	28	19	73.1769	1.5908	0	0	21	0	0	18	0	2	5	0	0	1.56409	-2.32189	-0.582072	0.560679	2.40465	-2.39465	-0.573819	0.700686	2.50556
1	O=C(Nc1n(CCCN(C)C)c2c(n1)cccc2)c1cc2n3[C@H](C)CCNC(=O)c3cc2cc1	7.09928	-129631	-1.12874e+06	79.7744	-8.67395	8.67395	-0.80034	73.9678	768.908	524.804	238.726	612.822	156.085	0	0	3	4	4	0	18	0	64	2	6	34	23	97.0721	1.51675	0	0	26	0	0	30	0	6	2	0	0	1.2231	-2.6393	-0.574384	0.610269	2.60554	-2.67429	-0.501462	0.660568	2.6857
1	Clc1c(NC(=O)NCCC)ccc(Oc2ncnc3c2cc(OC)c(OC)c3)c1	1.87746	-122935	-878737	-51.7385	-8.81138	8.81138	-0.71363	58.9907	722.586	503.468	213.298	566.938	155.648	0	0	3	4	5	0	16	0	50	2	7	29	18	87.5156	1.75031	0	0	20	1	0	21	0	4	4	0	0	1.50255	-2.54576	-0.59594	0.519258	2.48393	-2.65801	-0.500275	0.657498	2.53141
1	N(C)c1nc2n(CC3CCCC3)nc(-c3cnc(N4CCN(C)CC4)cc3)c2cn1	1.13373	-112594	-940199	151.607	-8.43066	8.43066	-0.48979	67.5238	725.775	627.169	94.1437	633.313	92.4617	0	0	3	4	5	0	15	0	60	1	6	30	19	85.0992	1.41832	0	0	22	0	0	30	0	8	0	0	0	1.19725	-2.74212	-0.538269	0.554138	2.75344	-2.86996	-0.465014	0.629938	2.89339
1	O=C1N(Cc2cc(Nc3ncc(-c4cn(C)nc4)cn3)ccc2)N=C(c2cn(C)nc2)C=C1	5.62429	-124740	-965964	258.53	-8.25245	8.25245	-0.45202	65.1847	747.945	526.679	221.265	571.04	176.905	0	0	3	4	6	0	22	0	54	1	7	33	20	85.954	1.59174	0	0	23	0	0	21	0	9	1	0	0	1.05773	-2.41153	-0.522122	0.581663	2.39323	-2.40474	-0.460283	0.657253	2.47666
1	O=C(OC(C)(C)C)Nc1c(OC)cc(-c2nn(CCN3CCC(OC)CC3)c3ncnc(N)c23)cc1	3.2353	-147845	-1.27923e+06	-37.8857	-8.63033	8.63033	-0.37482	78.2458	849.28	683.587	160.856	626.388	222.892	0	0	3	5	7	0	15	0	71	2	9	36	21	113.359	1.59661	0	0	25	0	0	35	0	7	4	0	0	1.34902	-2.78295	-0.387058	0.311722	2.72073	-2.8288	-0.235395	0.471084	2.69753
1	O(C)c1c(Cc2oc(C)cn2)ccc(-c2nn(CCN3CCC(N(C)C)CC3)c3ncnc(N)c23)c1	1.81895	-140423	-1.23763e+06	108.642	-8.82638	8.82638	-0.40467	78.835	837.259	696.98	135.949	688.626	148.633	0	0	3	4	7	0	20	0	70	1	8	36	21	107.865	1.54092	0	0	26	0	0	34	0	8	2	0	0	1.17567	-2.81854	-0.275771	0.378557	2.73261	-2.86746	-0.226786	0.422786	2.70861
1	O=C(OC(C)(C)C)Cc1c(OC)cc(-c2nn(CCN3CCC(N(C)C)CC3)c3ncnc(N)c23)cc1	1.99762	-147627	-1.34632e+06	4.28453	-8.86013	8.86013	-0.45671	83.6309	850.645	701.225	145.437	654.444	196.202	0	0	3	4	7	0	15	0	76	1	8	37	23	115.923	1.52531	0	0	27	0	0	39	0	7	3	0	0	1.34218	-2.81854	-0.275451	0.298072	2.73261	-2.86746	-0.22676	0.242544	2.70861
1	Clc1c([C@H](Oc2c(N)ncc(-c3cn(C4CCNCC4)nc3)c2)C)c(Cl)ccc1F	3.63	-128601	-962205	40.258	-8.2791	8.2791	-0.54032	62.8484	686.056	428.769	257.288	544.632	141.424	0	0	3	4	4	0	17	0	52	2	6	30	23	92.4671	1.77821	0	0	21	2	1	22	0	5	1	0	0	1.32163	-2.73904	-0.610937	0.649948	2.68833	-2.79252	-0.412524	0.751734	2.73432
1	Clc1c(Nc2c(S(=O)(=O)C(C)C)cccc2)nc(Nc2cc(NC(=O)CN)ccc2)nc1	5.24368	-133161	-1049837	9.119	-8.68674	8.68674	-0.8547	66.3822	745.71	440.196	305.514	510.869	234.84	0	0	4	6	6	0	18	0	55	4	10	32	19	101.43	1.84417	0	0	21	1	0	23	0	6	3	0	1	1.55505	-2.56938	-0.587587	0.642243	2.63302	-2.66098	-0.54916	0.712229	2.60686
1	O=C1c2c3c([nH]c2C(C)(C)c2c1cc(CC)c(N1CCN(CC4(O)CCOCC4)CC1)c2)cc(C#N)cc3	7.87971	-144189	-1.35174e+06	-16.1785	-8.85347	8.85347	-0.70524	85.3705	811.582	562.109	244.21	586.736	224.846	0	0	3	4	5	0	15	0	74	2	7	38	29	107.047	1.44658	0	0	31	0	0	36	0	4	3	0	0	1.13853	-2.81059	-0.422541	0.485608	2.76712	-2.92086	-0.318676	0.602548	2.70424
1	O=C1N2Nc3c1cccc3C=1C(=O)Nc3c(N=1)c(O[C@H]1C[C@@H](C)N(C1)CC2)ccc3	6.75937	-117564	-1.00036e+06	52.9697	-8.82829	8.82829	-1.24125	60.6287	589.275	386.623	202.651	443.145	146.129	0	0	2	3	5	0	12	0	51	2	7	30	19	82.583	1.61927	0	0	22	0	0	21	0	5	3	0	0	1.3285	-2.64532	-0.604086	0.668297	2.76005	-2.76066	-0.516928	0.731986	2.69992
1	Clc1c([C@H](Sc2c(N)ncc(-c3cn(C4CCNCC4)nc3)c2)C)c(Cl)ccc1F	3.02053	-125707	-942393	73.8699	-8.26944	8.26944	-0.64558	64.9464	701.582	423.385	278.197	545.78	155.802	0	0	2	3	3	0	17	0	52	2	5	30	24	92.4671	1.77821	0	0	21	2	1	22	0	5	0	0	1	1.32163	-2.73904	-0.610931	0.649787	2.68833	-2.79252	-0.377253	0.751822	2.73436
1	Clc1c([C@H](OC=2C=C(C(=O)Nc3ccc(N4CCN(C)CC4)cc3)C(=O)NC=2)C)c(Cl)ccc1F	6.11332	-151385	-1.16406e+06	-53.6828	-7.93015	7.93015	-0.90812	72.3928	797.375	463.241	334.134	655.924	141.451	0	0	3	4	5	0	12	0	60	3	8	35	26	107.466	1.7911	0	0	25	2	1	25	0	4	3	0	0	1.23896	-2.74729	-0.592065	0.581266	2.6414	-2.86968	-0.442902	0.710565	2.5975
1	Nc1ncnc2n(CCN3CCN(C)CC3)nc(-c3ccc(C)cc3)c12	2.57906	-97379	-758636	140.686	-8.76283	8.76283	-0.28846	57.8098	639.597	508.909	125.287	512.255	127.342	0	0	2	3	5	0	15	0	51	1	6	26	16	72.8352	1.42814	0	0	19	0	0	25	0	7	0	0	0	1.37632	-2.78015	-0.399904	0.434877	2.67288	-2.89308	-0.330009	0.459456	2.57756
1	N(CCN1CCN(CCn2nc(-c3ccc(C)cc3)c3c(N)ncnc23)CC1)(C)C	3.14837	-113228	-949587	148.081	-8.76254	8.76254	-0.28617	68.8574	743.122	608.938	129.251	611.389	131.733	0	0	2	3	6	0	15	0	62	1	7	30	19	87.0527	1.40408	0	0	22	0	0	32	0	8	0	0	0	1.27807	-2.79961	-0.223714	0.24369	2.69263	-2.91684	-0.178064	0.268051	2.58968
1	N(C)(C)C1CCN(CCn2nc(-c3cnc4[nH]ccc4c3)c3c(N)ncnc23)CC1	4.71434	-113440	-927662	185.227	-8.71633	8.71633	-0.31586	64.8634	697.465	555.776	131.347	497.324	200.142	0	0	2	3	7	0	18	0	57	3	10	30	17	83.3248	1.46184	0	0	21	0	0	27	0	9	0	0	0	1.19693	-2.81854	-0.58427	0.600706	2.73261	-2.86746	-0.514464	0.663263	2.70861
1	O=C(OC(C)(C)C)Nc1c(OC)cc(-c2nn(CCN3CCC(CN(C)C)CC3)c3ncnc(N)c23)cc1	2.51903	-152719	-1.38109e+06	7.41933	-8.59453	8.59453	-0.36486	85.3977	903.051	742.701	154.655	686.529	216.522	0	0	3	5	7	0	15	0	78	2	9	38	23	120.247	1.54163	0	0	27	0	0	40	0	8	3	0	0	1.3251	-2.82558	-0.330981	0.307293	2.74539	-2.84872	-0.230623	0.383134	2.75616
1	O=C(OC(C)(C)C)Nc1c(OC)cc(-c2nn(CCN3CCC(N4CCCC4)CC3)c3ncnc(N)c23)cc1	3.16381	-155673	-1.42201e+06	10.3495	-8.59254	8.59254	-0.36412	87.1577	910.569	732.796	172.648	696.836	213.733	0	0	3	5	7	0	15	0	79	2	9	39	24	121.761	1.54127	0	0	28	0	0	40	0	8	3	0	0	1.1489	-2.81628	-0.443134	0.316151	2.77495	-2.86552	-0.240168	0.559034	2.76558
1	O=C(OC(C)(C)C)Nc1c(OC)cc(-c2nn(CCN3CCC(N4CCCCC4)CC3)c3ncnc(N)c23)cc1	2.94789	-159268	-1.47878e+06	2.48083	-8.59939	8.59939	-0.36552	90.2513	929.846	750.104	174.646	714.303	215.543	0	0	3	5	7	0	15	0	82	2	9	40	25	125.206	1.5269	0	0	29	0	0	42	0	8	3	0	0	1.14063	-2.8602	-0.443134	0.316151	2.77041	-2.89491	-0.240168	0.559034	2.77862
1	O=C(Nc1c(OC)cc(-c2nn(CCN3CCC(N(C)C)CC3)c3ncnc(N)c23)cc1)CC(C)(C)C	3.68374	-145331	-1.33233e+06	46.9496	-8.54573	8.54573	-0.3497	84.5957	858.745	702.393	150.945	659.71	199.035	0	0	3	5	7	0	15	0	77	2	9	37	23	115.283	1.49719	0	0	27	0	0	40	0	8	2	0	0	1.34218	-2.81854	-0.214386	0.243799	2.73261	-2.86746	-0.169094	0.268171	2.74998
1	O(C)c1c(NCc2ccccc2)ccc(-c2nn(CCN3CCC(N(C)C)CC3)c3ncnc(N)c23)c1	2.53063	-139593	-1.25761e+06	133.401	-8.33115	8.33115	-0.29775	82.8866	863.013	686.376	172.484	724.957	138.055	0	0	3	4	6	0	21	0	73	2	8	37	25	107.134	1.46759	0	0	28	0	0	36	0	8	1	0	0	1.1521	-2.81854	-0.649178	0.619708	2.73261	-2.86746	-0.53808	0.742008	2.70862
1	O=C(NC(C)(C)C)Nc1c(OC)cc(-c2nn(CCN3CCC(N(C)C)CC3)c3ncnc(N)c23)cc1	3.99144	-146820	-1.32748e+06	66.5519	-8.52189	8.52189	-0.29739	83.2689	873.903	720.5	148.558	656.886	217.017	0	0	3	5	7	0	15	0	76	3	10	37	22	115.971	1.52593	0	0	26	0	0	39	0	9	2	0	0	1.34218	-2.81854	-0.274911	0.303039	2.73261	-2.86746	-0.226331	0.295184	2.70862
1	O=C(OC(C)(C)C)Nc1ccc(-c2nn(CCN3CCC(N(C)C)CC3)c3ncnc(N)c23)cc1	5.00592	-138151	-1.19219e+06	52.8643	-8.63572	8.63572	-0.28507	78.4085	836.096	657.404	174.192	613.506	222.59	0	0	3	4	6	0	15	0	71	2	8	35	21	108.418	1.52702	0	0	25	0	0	36	0	8	2	0	0	1.28194	-2.81854	-0.386289	0.312442	2.73261	-2.86746	-0.232774	0.47138	2.70861
1	O=C(OC(C)(C)C)Cc1ccc(-c2nn(CCN3CCC(N(C)C)CC3)c3ncnc(N)c23)cc1	5.34855	-136647	-1.21276e+06	48.7258	-8.82558	8.82558	-0.45218	79.7353	817.367	640.367	173.229	599.736	217.631	0	0	3	4	6	0	15	0	72	1	7	35	22	107.622	1.49475	0	0	26	0	0	37	0	7	2	0	0	1.28194	-2.81854	-0.343338	0.3005	2.73261	-2.86746	-0.297853	0.26048	2.70861
1	O=C(O)Cc1ccc(-c2nn(CCN3CCC(N(C)C)CC3)c3ncnc(N)c23)cc1	1.70057	-122304	-989619	44.7333	-8.84217	8.84217	-0.46875	67.361	722.491	567.671	149.969	505.675	216.817	0	0	2	4	7	0	15	0	60	3	10	31	18	93.773	1.56288	0	0	22	0	0	29	0	7	2	0	0	1.31506	-2.81854	-0.564566	0.540471	2.73261	-2.86746	-0.508185	0.528505	2.70861
1	O=C(Nc1ccc(C(=O)Nc2cc(Nc3nc(C)cc(-c4cnccc4)n3)c(C)cc2)cc1)C=C	6.36634	-130681	-1.06132e+06	96.4883	-8.45868	8.45868	-0.42461	71.727	801.683	481.273	316.325	631.563	170.12	0	0	3	5	5	0	24	0	59	3	8	35	24	91.1451	1.54483	0	0	27	0	0	24	0	6	2	0	0	1.23098	-2.35596	-0.639101	0.683556	2.30867	-2.32318	-0.553378	0.780795	2.46423
1	ClCC(=O)NCc1ccc(C(=O)Nc2cc(Nc3nc(-c4cnccc4)ccn3)c(C)cc2)cc1	0.602811	-136054	-1104702	63.9103	-8.60423	8.60423	-0.57886	71.4802	771.427	457.431	309.661	559.749	211.678	0	0	3	5	5	0	24	0	58	3	8	35	24	95.9998	1.65517	0	0	26	1	0	23	0	6	2	0	0	1.18888	-2.41265	-0.634285	0.660817	2.38045	-2.53631	-0.53808	0.750597	2.46332
1	Brc1cc(NC(=S)Nc2ccc(-c3c4c(C)n[nH]c4ncc3)cc2)ccc1	3.31039	-100535	-712653	185.781	-8.56607	8.56607	-0.77914	57.3187	658.175	336.093	316.659	493.923	164.252	0	0	4	5	4	0	21	0	43	5	9	27	19	71.2812	1.6577	0	1	20	0	0	16	0	5	0	0	1	1.21978	-2.34485	-0.644643	0.690186	2.27416	-2.40015	-0.494016	0.80693	2.443
1	Clc1ccc(Nc2nc(NC3CCC(N)CC3)nc3n(C4CCCCC4)cnc23)cc1	3.54149	-119448	-1.02123e+06	86.2878	-8.24088	8.24088	-0.25761	70.3638	719.148	502.106	217.042	583.048	136.1	0	0	3	4	4	0	15	0	61	3	7	31	20	90.8748	1.48975	0	0	23	1	0	30	0	7	0	0	0	1.25766	-2.79818	-0.639915	0.65356	2.74574	-2.8347	-0.53808	0.805915	2.88596
1	O=C(N(CC)C)c1cc2NC(=O)C(C(=Nc3ccc(CNCC)cc3)c3ccccc3)c2cc1	2.47924	-126018	-1.10555e+06	44.7011	-9.04183	9.04183	-0.35523	75.2878	780.841	539.987	240.854	612.084	168.757	0	0	3	4	4	0	18	0	64	2	6	34	25	92.1873	1.44043	0	0	28	0	0	30	0	4	2	0	0	1.41416	-2.5377	-0.643839	0.678372	2.52093	-2.61191	-0.53808	0.697538	2.53325
1	O=C(Nc1c(C)cc(N2CCN(C)CC2)cc1)Nc1ccc(-c2c3c(C)n[nH]c3ncc2)cc1	5.32652	-126693	-1.05649e+06	134.211	-8.42664	8.42664	-0.46068	73.599	775.14	568.921	201.278	628.162	146.978	0	0	4	5	5	0	21	0	63	5	10	34	24	93.8243	1.48927	0	0	26	0	0	29	0	7	1	0	0	1.03182	-2.74756	-0.474766	0.542429	2.64181	-2.86974	-0.396076	0.6808	2.55571
1	Clc1c(NC(=O)NCC)ccc(Oc2c(/C=N/OC)c(N)ncn2)c1	1.85703	-109034	-718432	17.6318	-8.77373	8.77373	-0.39614	48.9215	645.433	444.711	200.722	409.608	235.825	0	0	2	4	4	0	12	0	42	3	7	25	11	78.1224	1.86006	0	0	15	1	0	17	0	6	3	0	0	1.82628	-2.46444	-0.627362	0.600062	2.39553	-2.63689	-0.488653	0.716007	2.42717
1	O=C(NCC(C)C)Nc1ccc(-c2c3c(C)n[nH]c3ncc2)cc1	5.98674	-91021.1	-645505	69.7342	-8.63793	8.63793	-0.44139	51.9847	595.807	411.105	179.883	422.407	173.401	0	0	4	5	4	0	15	0	45	5	9	24	16	68.2264	1.51614	0	0	18	0	0	21	0	5	1	0	0	1.4506	-2.62722	-0.52202	0.638914	2.56889	-2.70424	-0.441381	0.689695	2.61151
1	O=C(OC)c1ccc(N=C(c2ccccc2)C2C(=O)Nc3c2ccc(C(=O)N(CC)C)c3)cc1	3.5046	-131482	-1.10825e+06	-33.398	-9.13335	9.13335	-0.77467	70.6978	751.257	497.165	254.091	590.163	161.093	0	0	3	4	4	0	18	0	59	1	5	34	23	89.8427	1.52276	0	0	27	0	0	25	0	3	4	0	0	1.43425	-2.53768	-0.610432	0.657514	2.52086	-2.61137	-0.51632	0.767203	2.53166
1	O=C(Nc1ccc(-c2c3c(C)n[nH]c3ncc2)cc1)NC1CC1	5.35364	-86759	-592699	115.301	-8.78637	8.78637	-0.36746	47.5575	554.85	364.906	184.444	371.605	183.245	0	0	4	4	4	0	15	0	40	5	9	23	15	62.2937	1.55734	0	0	17	0	0	17	0	5	1	0	0	1.27177	-2.35041	-0.566503	0.679117	2.75819	-2.57086	-0.485048	0.755593	2.7862
1	Clc1c(Nc2c(S(=O)(=O)C(C)C)cccc2)nc(Nc2c(OC(C)C)cc(c(C)c2)C2CCNCC2)nc1	5.69862	-153199	-1.42304e+06	-16.4236	-8.76148	8.76148	-0.78428	86.2705	853.656	563.146	290.51	654.84	198.817	0	0	3	5	6	0	18	0	74	3	9	38	27	122.412	1.65421	0	0	28	1	0	36	0	5	3	0	1	1.39157	-2.75124	-0.528751	0.591187	2.68315	-2.79257	-0.440445	0.668275	2.74863
1	Brc1cc2c(C3=C(c4cc(OC)c(OC)c(OC)c4)C(=O)NC3=O)c[nH]c2cc1	4.84342	-121962	-913507	-54.0405	-8.50703	8.50703	-1.45588	57.5555	660.757	419.749	237.462	502.79	157.967	0	0	3	4	5	0	15	0	46	2	7	29	20	78.7487	1.71193	0	1	21	0	0	17	0	2	5	0	0	1.56823	-2.32188	-0.587107	0.560679	2.40494	-2.39464	-0.572873	0.706284	2.50615
1	Fc1c(NC(=O)Nc2ccc(-c3c4c(C)n[nH]c4nc(O)c3)cc2)cc(C)cc1	2.35788	-117482	-834562	24.6241	-8.87213	8.87213	-0.50164	56.6233	650.942	383.671	262.055	454.013	196.928	0	0	4	5	5	0	21	0	47	6	11	29	19	80.1587	1.7055	0	0	21	0	1	18	0	5	2	0	0	1.25022	-2.33305	-0.633962	0.678865	2.29648	-2.40631	-0.509882	0.768924	2.45374
1	Cl[C@@H]1C[C@H](C)OC(=O)c2c(O)cc(OC)cc2/C=C\CCCC(=O)C1	4.44611	-108977	-816771	-173.053	-9.36004	9.36004	-0.38779	54.9662	563.046	348.49	214.555	389.616	173.43	0	0	3	4	4	0	6	0	48	1	5	25	18	71.716	1.49408	0	0	19	1	0	23	0	0	5	0	0	2.07468	-2.6235	-0.599273	0.460553	2.6507	-2.62727	-0.518725	0.51676	2.6856
1	Oc1ccc(Nc2nc(NC3CCC(N)CC3)nc3n(C4CCCCC4)cnc23)cc1	2.23201	-118536	-1.03255e+06	50.1332	-8.12942	8.12942	-0.10166	69.6526	704.123	537.224	166.899	528.999	175.124	0	0	4	5	5	0	15	0	62	4	9	31	19	91.8867	1.48204	0	0	23	0	0	31	0	7	1	0	0	1.25766	-2.79818	-0.639779	0.685	2.74574	-2.8347	-0.555513	0.774178	2.88596
1	FC(F)(F)c1c(CN2CCN(C)CC2)ccc(NC(=O)CNc2c(F)cc(-c3cnc(NC(=O)C4CC4)cc3)cc2)c1	4.25083	-186863	-1.51124e+06	-131.606	-8.67027	8.67027	-0.70346	84.5694	918.983	593.481	320.65	665.391	253.592	0	0	3	4	5	0	18	0	74	3	8	42	31	126.783	1.71328	0	0	30	0	4	32	0	6	2	0	0	0.999504	-2.7713	-0.520966	0.447815	2.77078	-2.87102	-0.471614	0.547224	2.84143
1	O=C(NCC)c1cc2NC(=O)C(C=Nc3ccc(CN4CCCCC4)cc3)c2cc1	0							66.9142	740.29	514.147	226.143	579.453	160.837	0	0	3	4	4	0	12	0	58	2	6	30	21	85.1179	1.46755	0	0	24	0	0	28	0	4	2	0	0	1.17702	-2.77195	-0.57207	0.576873	2.68188	-2.74576	-0.53808	0.610075	2.75145
1	Ic1cc2c(C3=C(c4cc(OC)c(OC)c(OC)c4)C(=O)NC3=O)c[nH]c2cc1	6.3442	-121822	-912806	-41.8118	-8.56451	8.56451	-1.46295	59.8555	666.931	401.748	261.639	499.949	166.982	0	0	3	4	5	0	15	0	46	2	7	29	20	78.7487	1.71193	0	0	21	0	0	17	1	2	5	0	0	1.56823	-2.32188	-0.586683	0.560679	2.40492	-2.39465	-0.573074	0.706284	2.50564
1	Fc1cc(NC(=O)Nc2ccc(Nc3ncnc4c3ccc(OCC3CCN(C)CC3)c4)cc2)ccc1	2.94325	-146435	-1154083	15.3172	-8.44512	8.44512	-0.67153	77.378	848.203	572.47	270.377	709.899	138.304	0	0	3	4	5	0	22	0	66	3	8	37	26	105.933	1.60504	0	0	28	0	1	29	0	6	2	0	0	0.991721	-2.79665	-0.629633	0.627933	2.72929	-2.81657	-0.523249	0.733757	2.7424
1	Cl[C@@H]1C[C@H](C)OC(=O)c2c(O)cc(OC)cc2CCCCCC(=O)C1	3.53603	-109635	-835462	-222.314	-9.34635	9.34635	-0.36533	56.2998	570.539	368.634	201.905	409.516	161.023	0	0	3	4	4	0	6	0	50	1	5	25	18	73.7761	1.47552	0	0	19	1	0	25	0	0	5	0	0	2.07383	-2.65635	-0.546091	0.40978	2.66211	-2.63178	-0.469263	0.445494	2.73898
1	O(C)c1cc(OC)cc(Nc2nc(NC3CCC(N)CC3)nc3n(CCCCCC)cnc23)c1	2.32447	-133731	-1.20549e+06	7.70172	-8.25164	8.25164	-0.1782	77.9753	824.114	678.911	145.202	650.038	174.076	0	0	3	4	6	0	15	0	71	3	9	34	21	106.134	1.49485	0	0	25	0	0	37	0	7	2	0	0	1.39987	-2.79811	-0.559432	0.545859	2.74562	-2.8347	-0.540279	0.627859	2.78764
1	O=C(NC(C)(C)C)Nc1ccc(-c2c3c(C)n[nH]c3ncc2)cc1	5.10545	-91014.1	-655318	76.6818	-8.6837	8.6837	-0.36302	51.9847	589.649	397.076	187.712	414.047	175.602	0	0	4	4	4	0	15	0	45	5	9	24	16	68.2264	1.51614	0	0	18	0	0	21	0	5	1	0	0	1.48497	-2.65245	-0.466577	0.522795	2.59806	-2.74634	-0.338151	0.674598	2.60451
1	O(C)c1cc(OC)cc(Nc2nc(NC3CCC(N)CC3)nc3n(CCCC)cnc23)c1	2.30394	-126543	-1.11167e+06	21.4146	-8.24588	8.24588	-0.17753	71.7882	752.036	620.48	131.556	580.242	171.794	0	0	3	4	6	0	15	0	65	3	9	32	19	99.2955	1.52762	0	0	23	0	0	33	0	7	2	0	0	1.41794	-2.79811	-0.559432	0.545859	2.74562	-2.8347	-0.540297	0.627859	2.78761
1	O=C(Nc1cc(Nc2nc(-c3cnccc3)ccn2)c(C)cc1)c1ccc(CN)cc1	3.09047	-113818	-933183	110.065	-8.43109	8.43109	-0.49383	64.3114	677.665	445.652	227.523	523.285	154.38	0	0	3	4	5	0	24	0	53	3	8	31	22	79.9234	1.50799	0	0	24	0	0	22	0	6	1	0	0	1.23839	-2.37603	-0.642169	0.6867	2.31569	-2.47948	-0.555272	0.787476	2.46278
1	S=C(Nc1cc(C(F)(F)F)ccc1)Nc1ccc(-c2c3c(C)n[nH]c3ncc2)cc1	2.31132	-128924	-878860	24.7807	-8.70524	8.70524	-0.92128	57.6997	661.783	333.74	322.323	398.768	263.015	0	0	4	5	4	0	21	0	46	5	9	30	22	81.4807	1.77132	0	0	21	0	3	16	0	5	0	0	1	1.2124	-2.34938	-0.584978	0.646594	2.35838	-2.40168	-0.479425	0.805915	2.47825
1	O=C(N(CC)C)c1cc2NC(=O)C(C(=Nc3cc(CN(CC)CC)ccc3)c3ccccc3)c2cc1	3.59594	-133191	-1.2543e+06	45.4199	-9.02131	9.02131	-0.29491	81.475	768.507	526.312	242.195	595.357	173.15	0	0	3	4	4	0	18	0	70	1	5	36	27	98.8694	1.41242	0	0	30	0	0	34	0	4	2	0	0	1.44701	-2.64834	-0.541241	0.577158	2.53588	-2.65393	-0.464175	0.690314	2.57731
1	O=C(C)N1Cc2c([nH]c(/C=C/3\C(=O)Nc4c\3cc(OC(C)C)cc4)c2)CC1	4.61707	-105754	-788190	-25.6882	-8.17726	8.17726	-0.99415	58.0022	643.602	431.985	211.617	483.663	159.94	0	0	2	3	3	0	11	0	50	2	5	27	19	76.4024	1.52805	0	0	21	0	0	23	0	3	3	0	0	1.34946	-2.61393	-0.437737	0.503009	2.57823	-2.65151	-0.36848	0.571755	2.5936
1	O=C(Nc1c(N2CCN(C)CC2)ccc(C)c1)Nc1ccc(-c2c3c(C)n[nH]c3ncc2)cc1	5.37855	-126693	-1.09113e+06	134.705	-8.73635	8.73635	-0.40276	73.599	765.57	557.853	202.252	637.189	128.381	0	0	4	5	5	0	21	0	63	5	10	34	24	93.8243	1.48927	0	0	26	0	0	29	0	7	1	0	0	1.0988	-2.74726	-0.508398	0.590652	2.64348	-2.86977	-0.412041	0.686021	2.56165
1	Fc1cc2c(C3=C(c4cc(OC)c(OC)c(OC)c4)C(=O)NC3=O)c[nH]c2cc1	5.70394	-125000	-925063	-103.108	-8.58703	8.58703	-1.43755	55.0625	616.982	423.012	191.196	455.944	161.039	0	0	2	3	5	0	15	0	46	2	7	29	20	78.7487	1.71193	0	0	21	0	1	17	0	2	5	0	0	1.56823	-2.32187	-0.6042	0.560679	2.40541	-2.39466	-0.573462	0.706284	2.50539
1	O=C(Nc1n(-c2ccccc2)nc(C(C)(C)C)c1)Nc1cc(Oc2c3NC(=O)Nc3ccc2)ccc1	7.67555	-138667	-1.15976e+06	89.5558	-8.78961	8.78961	-0.24582	73.8626	820.469	488.131	332.338	595.503	224.965	0	0	3	4	3	0	23	0	62	4	7	36	24	98.3021	1.58552	0	0	27	0	0	26	0	6	3	0	0	1.13096	-2.60732	-0.570758	0.664841	2.59005	-2.53345	-0.492475	0.781269	2.67091
1	S(=O)(=O)(N1CCN(C)CC1)c1cc2C(=C(c3[nH]c4c(n3)cccc4)c3ccccc3)C(=O)Nc2cc1	7.01865	-138069	-1.2813e+06	79.6632	-8.98002	8.98002	-1.48061	74.9958	702.621	435.517	267.105	548.932	153.69	0	0	3	5	6	0	21	0	61	3	9	36	25	100.932	1.65462	0	0	27	0	0	25	0	5	3	0	1	1.23109	-2.76182	-0.629982	0.639522	2.66958	-2.88285	-0.53808	0.728818	2.56519
1	O=C(N(C)c1ccc(N=C(c2ccccc2)C2C(=O)Nc3c2ccc(C(=O)N(CC)C)c3)cc1)CN1CCN(C)CC1	7.40132	-160236	-1.55748e+06	41.3525	-8.60733	8.60733	-0.29629	92.4241	909.23	663.425	245.804	756.088	153.142	0	0	3	4	6	0	18	0	80	1	7	42	29	119.603	1.49504	0	0	33	0	0	38	0	6	3	0	0	1.17113	-2.76757	-0.544148	0.563926	2.66908	-2.89641	-0.458008	0.656365	2.5435
1	Oc1cc2c3c(C)c4c(NCCCN(CC)CC)nccc4c(C)c3n(C)c2cc1	2.22684	-110426	-945309	46.8053	-7.84489	7.84489	-0.67284	70.5394	702.609	499.667	184.461	591.018	111.591	0	0	2	3	3	0	17	0	62	2	5	30	24	85.0638	1.372	0	0	25	0	0	32	0	4	1	0	0	1.45778	-2.69938	-0.435865	0.427196	2.59545	-2.74878	-0.326189	0.557408	2.57955
1	FC(F)(F)Oc1cc(C(=O)Nc2c(F)c(F)c(F)c(Oc3c4NC(=O)Nc4ccc3)c2)ccc1	6.31393	-176454	-1.16854e+06	-311.124	-8.80115	8.80115	-1.10745	54.1447	687.512	302.37	385.142	414.397	273.115	0	0	2	3	3	0	18	0	45	3	6	34	25	88.5763	1.96836	0	0	21	0	6	11	0	3	4	0	0	1.36118	-2.26616	-0.662309	0.657894	2.35532	-2.30836	-0.515275	0.799374	2.49752
1	O=C(O)c1cnc(C(=O)NC2CN(c3nc(Nc4cc(OC)c(OC)c(OC)c4)c4c(n3)COC4)CC2)cc1	2.74587	-165959	-1.39618e+06	-131.754	-8.59032	8.59032	-1.37868	76.6442	858.985	680.826	178.158	606.399	252.585	0	0	3	5	10	0	18	0	67	4	14	39	22	114.449	1.7082	0	0	26	0	0	28	0	6	7	0	0	1.14533	-2.53099	-0.588051	0.562117	2.70927	-2.71375	-0.541577	0.649964	2.6309
1	Br[C@@H]1C[C@H](C)OC(=O)c2c(O)cc(OC)cc2CCCCCC(=O)C1	3.80162	-109162	-834132	-210.925	-9.35508	9.35508	-0.38279	57.1698	584.545	363.23	221.316	409.707	174.838	0	0	3	4	4	0	6	0	50	1	5	25	18	73.7761	1.47552	0	1	19	0	0	25	0	0	5	0	0	2.07383	-2.65766	-0.545943	0.409673	2.65936	-2.62973	-0.468307	0.458624	2.73999
1	Fc1c(C(C)n2nnc3ncc(-c4cn(CCO)nc4)nc23)cc2c(ncc(-c3cn(C)nc3)c2)c1	3.51791	-143634	-1.14103e+06	242.502	-8.74057	8.74057	-1.03175	68.6017	782.156	515.195	261.199	537.242	244.914	0	0	3	5	8	0	29	0	57	1	9	36	23	96.9777	1.70136	0	0	24	0	1	21	0	10	1	0	0	1.07933	-2.43348	-0.643575	0.644367	2.45743	-2.43586	-0.539254	0.593915	2.56782
1	O=C(N(C)c1ccc(N=CC2C(=O)Nc3c2ccc(C(=O)NCC)c3)cc1)CN(C)C	4.43992	-122468	-947217	-4.82373	-8.6544	8.6544	-0.44314	66.3894	756.814	535.772	221.042	573.03	183.784	0	0	2	3	5	0	12	0	58	2	7	31	19	90.9745	1.56853	0	0	23	0	0	27	0	5	3	0	0	1.41318	-2.55601	-0.549621	0.535324	2.4984	-2.69162	-0.470444	0.598789	2.51486
1	Clc1c(OCc2ncccc2)ccc(Nc2c(c(N)ncn2)-c2occ(CNC(=O)C=C)n2)c1	2.95561	-138354	-1.05906e+06	78.5589	-8.85908	8.85908	-0.69894	66.1019	785.26	477.655	307.605	518.435	266.825	0	0	3	5	6	0	23	0	54	3	9	34	18	95.8771	1.7755	0	0	23	1	0	20	0	7	3	0	0	1.24188	-2.34241	-0.664452	0.631786	2.35289	-2.47358	-0.549845	0.721166	2.47092
1	O=C(N)c1cc(Cc2[nH]c(c(-c3nc(C)ccc3)n2)-c2cc3c(nccc3)cc2)ccc1	5.74132	-114627	-945565	119.189	-8.33098	8.33098	-0.48264	66.0647	706.887	438.261	263.592	551.842	155.045	0	0	3	4	5	0	27	0	53	3	8	32	24	77.52	1.46264	0	0	26	0	0	21	0	5	1	0	0	1.2566	-2.32026	-0.63242	0.678309	2.35306	-2.46104	-0.532719	0.754905	2.44832
1	Brc1cc(F)c(COc2c(C(=O)N)c(NC(=O)NCCCCN3CCCC3)sn2)c(F)c1	5.89298	-147695	-1.04806e+06	-126.727	-9.02566	9.02566	-0.64667	66.173	804.694	509.964	294.73	625.622	179.072	0	0	3	5	4	0	11	0	56	3	7	32	20	110.37	1.97089	0	1	20	0	2	24	0	5	3	0	1	1.37695	-2.666	-0.612709	0.621716	2.7017	-2.7188	-0.411938	0.851512	2.72179
1	O(C)c1c(Nc2nc(NC3CCC(N)CC3)nc3n(CCC(C)C)cnc23)ccc(OC)c1	1.93	-130133	-1.14707e+06	18.9299	-8.02138	8.02138	0.00397	74.8818	790.849	646.855	143.995	621.001	169.848	0	0	3	4	6	0	15	0	68	3	9	33	20	102.732	1.51076	0	0	24	0	0	35	0	7	2	0	0	1.42398	-2.79811	-0.556601	0.588971	2.74563	-2.8347	-0.519646	0.628447	2.78762
1	O=C(N)C=1C(=O)C(Nc2c(O)cccc2)=CC(=O)C=1N	1.07457	-85719.9	-523547	-76.9766	-8.61217	8.61217	-1.24773	36.7227	465.944	267.936	198.008	200.192	265.753	0	0	2	3	4	0	6	0	31	4	8	20	10	54.6657	1.76341	0	0	13	0	0	11	0	3	4	0	0	2.04038	-2.32	-0.659259	0.641117	2.38568	-2.54472	-0.662585	0.680531	2.41367
1	Clc1c(F)ccc(Nc2ncnc3c2cc(NC(=O)/C(/F)=C/CN(C)C)c(OC)c3)c1	5.61806	-137931	-987406	-41.3186	-8.58001	8.58001	-0.8416	60.6939	733.544	482.281	246.138	596.235	137.308	0	0	3	4	5	0	16	0	51	2	7	31	21	95.0068	1.86288	0	0	21	1	2	20	0	5	2	0	0	1.5968	-2.54967	-0.602203	0.552865	2.43196	-2.62907	-0.473195	0.749564	2.45022
1	O=C1/C(=C\c2cc(O)c(O)cc2)/Oc2c1cccc2	2.83737	-76965.3	-442875	-65.6633	-8.86042	8.86042	-1.02809	36.2759	453.235	247.771	205.464	335.272	117.962	1	1	0	0	3	0	12	0	29	2	5	19	14	41.0588	1.41582	0	0	15	0	0	10	0	0	4	0	0	1.56276	-2.20665	-0.739537	0.77355	2.32534	-2.06521	-0.656338	0.812517	2.44576
1	O=C(Nc1c(N2CCOCC2)cccc1)Nc1ccc(-c2c3c(C)n[nH]c3ncc2)cc1	3.54404	-121816	-981877	91.3457	-8.79914	8.79914	-0.48118	66.447	702.815	481.859	216.486	562.961	139.854	0	0	4	5	5	0	21	0	56	5	10	32	22	87.6239	1.56471	0	0	24	0	0	24	0	6	2	0	0	1.0862	-2.66579	-0.562976	0.625575	2.60074	-2.78155	-0.463073	0.730064	2.53023
1	O=C(NCc1ccc(C(=O)Nc2cc(Nc3nc(-c4cnccc4)ccn3)c(C)cc2)cc1)C(=C)C	6.24013	-134275	-1.15916e+06	90.4946	-8.63297	8.63297	-0.63756	74.8206	797.838	491.944	301.323	624.926	172.913	0	0	3	5	5	0	24	0	62	3	8	36	25	94.833	1.52957	0	0	28	0	0	26	0	6	2	0	0	1.18239	-2.41356	-0.630786	0.655443	2.36646	-2.49215	-0.551769	0.721968	2.4635
1	FC(F)(F)CNc1nc(Nc2ccc(C(=O)NCCC)cc2)nc2[nH]ccc12	4.54276	-128750	-878316	-85.7598	-8.44654	8.44654	-0.47122	53.4221	656.601	369.728	281.308	358.798	297.804	0	0	4	5	4	0	15	0	47	5	9	28	17	85.0317	1.80919	0	0	18	0	3	19	0	6	1	0	0	1.46562	-2.54386	-0.615604	0.6585	2.50536	-2.63223	-0.530204	0.701211	2.53174
1	O=C(Nc1cc(CN(C)C)ccc1)Nc1ccc(-c2c3c(C)n[nH]c3ncc2)cc1	5.37025	-111476	-859414	124.872	-8.77636	8.77636	-0.34251	63.885	702.237	502.798	195.704	558.027	144.209	0	0	4	5	5	0	21	0	54	5	10	30	21	81.1731	1.50321	0	0	23	0	0	24	0	6	1	0	0	1.19371	-2.55736	-0.536387	0.635887	2.4336	-2.56778	-0.42254	0.717408	2.50425
1	Clc1cc(Nc2nc(NC3CCC(N)CC3)nc3n(C/C=C(/CCC=C(C)C)\C)cnc23)ccc1	3.55781	-133142	-1.19285e+06	109.614	-8.19891	8.19891	-0.18114	81.4045	825.416	562.697	262.719	661.536	163.879	0	0	3	4	4	0	15	0	71	3	7	35	24	102.481	1.4434	0	0	27	1	0	36	0	7	0	0	0	1.33988	-2.7981	-0.548861	0.597157	2.74562	-2.8347	-0.477423	0.69098	2.7876
1	O=C(NCc1ccc(C(=O)Nc2cc(Nc3nc(-c4cnccc4)ccn3)c(C)cc2)cc1)/C=C/C	2.99922	-134277	-1.14064e+06	94.0085	-8.63245	8.63245	-0.62818	74.8206	821.137	517.039	299.659	658.195	162.942	0	0	3	5	5	0	24	0	62	3	8	36	25	94.833	1.52957	0	0	28	0	0	26	0	6	2	0	0	1.17615	-2.40192	-0.641452	0.68675	2.34829	-2.47956	-0.553431	0.773021	2.46329
1	FC(F)(F)c1n[nH]c2nccc(-c3ccc(NC(=O)Nc4cc(CC)ccc4)cc3)c12	2.77953	-135433	-964832	-36.5636	-8.80164	8.80164	-0.85102	58.6953	668.611	390.493	274.723	431.605	237.007	0	0	4	5	4	0	21	0	49	5	9	31	23	85.5901	1.74674	0	0	22	0	3	18	0	5	1	0	0	1.25522	-2.42912	-0.586071	0.648595	2.37799	-2.40922	-0.479683	0.752761	2.49281
1	O=C(NCc1ncccc1)c1ccc(-n2ncc(-c3ccncc3)c2)cc1	4.65421	-98561.2	-683145	140.935	-9.06608	9.06608	-0.81785	54.5975	639.509	401.854	237.655	536.486	103.023	0	0	3	4	4	0	23	0	44	1	5	27	20	66.8798	1.52	0	0	21	0	0	17	0	5	1	0	0	1.15534	-2.37453	-0.617917	0.701799	2.34301	-2.4778	-0.53808	0.785583	2.38319
1	O=C(N(CC)C)c1cc2NC(=O)C(C(=NC3CCCCC3)c3ccccc3)c2cc1	4.40211	-112100	-975310	-3.60652	-8.95488	8.95488	-0.12306	68.241	667.113	470.461	196.652	553.538	113.575	0	0	2	3	3	0	12	0	59	1	4	30	22	83.3432	1.4126	0	0	25	0	0	29	0	3	2	0	0	1.46634	-2.76069	-0.588487	0.620808	2.71929	-2.65733	-0.509869	0.676501	2.83755
1	O=C(N(CC)C)c1cc2NC(=O)C(C(=NC3CCN(C)CC3)c3ccccc3)c2cc1	4.37681	-117169	-1.02905e+06	37.5618	-8.95859	8.95859	-0.1443	70.0078	695.623	516.506	179.117	579.78	115.843	0	0	3	4	4	0	12	0	61	1	5	31	22	88.4719	1.45036	0	0	25	0	0	30	0	4	2	0	0	1.46129	-2.76104	-0.526037	0.552882	2.70014	-2.80286	-0.453836	0.596645	2.68578
1	O=C(N(C)c1ccc(N=CC2C(=O)Nc3c2ccc(C(=O)NCC)c3)cc1)CN1CCN(C)CC1	6.17993	-137685	-1.14316e+06	4.47548	-8.69096	8.69096	-0.47027	76.1034	823.233	601.655	221.578	637.346	185.887	0	0	2	3	6	0	12	0	67	2	8	35	22	103.952	1.55152	0	0	26	0	0	32	0	6	3	0	0	1.1644	-2.76757	-0.5494	0.535322	2.66908	-2.89641	-0.470377	0.598601	2.54321
1	O=C(N(CC)C)c1cc2NC(=O)C(C(=Nc3ccccc3)c3ccccc3)c2cc1	4.0851	-110157	-911780	50.682	-9.00247	9.00247	-0.3264	64.2402	664.944	419.852	245.091	544.352	120.592	0	0	2	3	3	0	18	0	53	1	4	30	22	76.6866	1.44692	0	0	25	0	0	23	0	3	2	0	0	1.46705	-2.53768	-0.623766	0.67039	2.5208	-2.61137	-0.523893	0.774904	2.53162
1	FC(F)(F)c1n[nH]c2nccc(-c3ccc(NC(=O)Nc4cc(C)ccc4)cc3)c12	2.58084	-131840	-920850	-29.5588	-8.81052	8.81052	-0.83317	55.6017	637.189	361.324	272.446	425.052	212.136	0	0	4	4	4	0	21	0	46	5	9	30	22	81.4807	1.77132	0	0	21	0	3	16	0	5	1	0	0	1.26626	-2.34256	-0.587347	0.648735	2.37729	-2.40471	-0.480785	0.753767	2.47492
0	5284627	4.16375	-110501	-812080	-344.07	-10.6727	10.6727	-0.34948	45.5387	525.939	326.318	199.621	267.417	258.523	0	0	2	3	8	0	0	0	43	1	9	22	9	74.0712	1.72259	0	0	12	0	0	21	0	1	8	0	1	1.84246	-2.66166	-0.184036	0.0922246	2.8872	-2.86028	-0.3339	0.2142	2.73492
0	8249	3.5428	-58128.6	-328765	67.9395	-9.19542	9.19542	0.56039	33.1019	455.079	308.801	146.277	254.108	200.971	1	0	0	2	2	0	6	0	30	3	5	15	8	43.7744	1.45915	0	0	10	0	0	15	0	5	0	0	0	2.00551	-2.42176	-0.560821	0.619226	2.4052	-2.65948	-0.456984	0.720447	2.43007
0	137641313	2.35945	-102879	-709821	109.011	-8.6698	8.6698	-1.12103	51.2731	634.703	430.454	204.248	461.526	173.177	0	0	2	3	6	0	15	0	44	1	7	25	13	79.2495	1.80113	0	0	15	0	0	19	0	7	2	0	1	1.43056	-2.52731	-0.398502	0.352408	2.48958	-2.46548	-0.380392	0.397997	2.63256
0	17513	6.26159	-87061.1	-528864	-172.003	-8.34811	8.34811	0.59762	33.5851	428.127	309.646	118.481	153.215	274.912	0	0	2	4	6	0	5	0	32	5	11	18	5	58.5581	1.82994	0	0	9	0	0	14	0	4	5	0	0	2.05566	-2.51163	-0.599636	0.674569	2.77061	-2.71074	-0.632396	0.564554	2.63958
0	6083	2.98814	-112580	-732192	-310.637	-8.89212	8.89212	-0.26798	41.6791	503.532	336.185	167.347	154.196	349.337	0	0	3	5	10	0	9	0	37	6	16	23	5	74.9664	2.02612	0	0	10	0	0	14	0	5	7	1	0	1.64384	-2.52054	-0.633639	0.748761	2.77497	-2.7074	-0.759005	0.54076	2.65641
0	11671467	4.88298	-185444	-1.53097e+06	-335.473	-8.8359	8.8359	-0.80647	75.8216	868.789	623.34	245.449	575.295	293.494	0	0	3	5	12	0	18	0	66	5	17	40	18	128.638	1.94905	0	0	23	0	1	26	0	6	9	1	0	1.36176	-2.58155	-0.609921	0.594194	2.62234	-2.69838	-0.625381	0.582382	2.58223
0	2244	1.24249	-58670.1	-284600	-142.035	-9.75177	9.75177	-0.55358	24.3823	360.334	196.385	163.949	236.233	124.101	1	1	0	0	3	0	6	0	21	2	5	13	7	31.7093	1.50997	0	0	9	0	0	8	0	0	4	0	0	2.49418	-2.21335	-0.573287	0.625762	2.27119	-2.24029	-0.489504	0.69346	2.34653
0	1327046	1.67756	-115183	-841308	100.019	-9.27179	9.27179	-0.91018	51.8191	581.673	343.141	238.532	455.397	126.276	0	0	3	3	4	0	16	0	41	0	4	27	14	77.36	1.88683	0	0	17	2	0	14	0	6	2	0	0	1.58351	-2.45639	-0.625619	0.641463	2.49246	-2.62709	-0.382235	0.852931	2.4886
0	5330083	4.05642	-147695	-1247191	-15.849	-8.95541	8.95541	-0.89801	78.6898	830.276	597.787	229.213	731.067	99.2098	0	0	3	4	6	0	16	0	66	1	7	36	28	108.586	1.64525	0	0	27	2	0	30	0	4	3	0	0	1.32022	-2.81996	-0.568082	0.489632	2.74353	-2.80653	-0.459246	0.687141	2.80771
0	44825565	2.79306	-159647	-1.40629e+06	-145.213	-9.16026	9.16026	-0.56506	88.3081	900.103	641.122	258.981	738.272	161.831	0	0	3	5	5	0	12	0	78	2	7	40	27	117.65	1.50834	0	0	31	0	0	38	0	4	5	0	0	0.933204	-2.75165	-0.587533	0.581863	2.77354	-2.79942	-0.53808	0.620154	2.85795
0	16256020	3.89508	-111669	-949767	94.5227	-8.51689	8.51689	-0.60625	65.3802	626.888	380.6	246.287	550.685	76.2024	0	0	2	3	3	0	17	0	53	1	4	30	21	82.7439	1.56121	0	0	24	0	0	23	0	3	2	0	1	1.33238	-2.61275	-0.606574	0.70387	2.71286	-2.7006	-0.529922	0.797067	2.73298
0	88309	2.95072	-73091.3	-388574	-126.23	-8.85467	8.85467	-0.38988	32.3431	449.194	290.491	158.703	216.491	232.703	0	0	2	4	4	0	0	0	30	4	8	16	7	50.6845	1.68948	0	0	10	0	0	14	0	2	4	0	0	2.17884	-2.5689	-0.51109	0.453542	2.58933	-2.50608	-0.351698	0.4665	2.68252
0	16256082	4.02931	-135764	-1.14999e+06	-15.3951	-8.37671	8.37671	-0.66825	73.1782	758.774	420.219	338.555	586.614	172.16	0	0	3	5	4	0	17	0	62	2	6	34	22	102.458	1.65255	0	0	25	0	0	28	0	4	4	0	1	1.47085	-2.54504	-0.570914	0.461999	2.50677	-2.66987	-0.507659	0.493689	2.5677
0	126961602	4.79372	-137416	-1.09111e+06	44.5715	-9.07418	9.07418	-0.9891	72.2006	818.47	498.345	320.125	641.166	177.304	0	0	3	5	5	0	17	0	60	3	8	34	19	106.509	1.77514	0	0	23	1	0	26	0	7	2	0	1	1.21377	-2.53457	-0.555181	0.597701	2.7135	-2.65597	-0.48188	0.656304	2.64231
0	239462	4.07228	-57053.2	-304191	20.7688	-8.60983	8.60983	-0.51062	31.9299	427.18	250.382	176.798	268.646	158.534	1	1	0	0	2	0	6	0	25	1	3	15	10	42.8234	1.71294	0	0	11	0	0	10	0	2	1	0	1	1.64351	-2.32791	-0.582344	0.687301	2.30833	-2.46057	-0.53808	0.730764	2.533
0	44221929	5.15313	-157380	-1183748	35.4091	-9.02244	9.02244	-1.125	69.2689	793.063	442.797	350.266	528.906	264.156	0	0	3	4	5	0	26	0	57	1	6	37	24	99.4184	1.74418	0	0	26	0	3	20	0	7	1	0	0	1.14692	-2.3305	-0.525877	0.599288	2.37641	-2.30848	-0.476533	0.645489	2.4905
0	1103613	0.111418	-148082	-1.16849e+06	-173.921	-8.46492	8.46492	0.02568	71.4694	803.5	613.647	189.853	620.527	182.972	0	0	2	4	4	0	6	0	66	2	6	34	18	109.803	1.66368	0	0	22	0	0	32	0	6	6	0	0	1.30346	-2.71159	-0.355765	0.275823	2.65439	-2.86438	-0.219668	0.451914	2.50832
0	3146919	0.775013	-61893.5	-342392	-5.69054	-10.0692	10.0692	0.57835	29.4191	400.261	282.169	118.092	186.134	214.128	1	1	0	0	2	0	0	0	28	3	5	14	4	47.303	1.68939	0	0	8	0	0	14	0	4	2	0	0	1.94587	-2.62391	-0.5082	0.486406	2.73817	-2.74811	-0.511213	0.622626	2.65277
0	11540975	5.36229	-133543	-1174544	194.652	-8.46127	8.46127	-0.97734	80.7834	839.852	513.886	315.716	616.857	222.995	0	0	3	4	6	0	27	0	64	1	7	37	27	99.3606	1.55251	0	0	28	0	0	27	0	7	0	0	2	1.00887	-2.77419	-0.647308	0.69812	2.70627	-2.7541	-0.53808	0.805915	2.76989
0	11445420	6.71242	-174094	-1.68644e+06	-107.147	-9.30371	9.30371	-0.81587	92.6831	890.934	614.037	276.897	671.524	219.41	0	0	4	6	7	0	18	0	81	5	12	43	31	128.032	1.58064	0	0	33	0	1	38	0	5	4	0	0	1.13522	-2.82174	-0.627478	0.668856	2.76222	-2.88807	-0.560143	0.686896	2.85242
0	5204	0.0315436	-109032	-766268	-130.243	-8.96668	8.96668	-0.00334	52.0143	572.835	403.669	169.167	435.304	137.531	0	0	3	3	6	0	12	0	44	0	6	26	18	63.208	1.43655	0	0	20	0	0	18	0	0	6	0	0	1.1131	-2.53001	-0.618539	0.59611	2.83487	-2.54272	-0.533118	0.698394	2.86032
0	11504922	10.16	-148816	-1.34284e+06	291.941	-9.10335	9.10335	-1.56098	85.9834	899.864	580.184	310.459	655.229	244.635	0	0	3	5	9	0	33	0	69	2	11	42	28	98.1119	1.42191	0	0	33	0	0	27	0	9	0	0	0	0.874962	-2.77044	-0.647693	0.698461	2.7145	-2.75648	-0.53808	0.805915	2.76533
0	73481	6.46662	-175744	-1.93396e+06	-80.8174	-8.32044	8.32044	0.16692	98.8037	840.56	682.521	158.039	800.326	40.2338	0	0	3	4	6	0	24	0	85	1	7	45	37	121.662	1.43131	0	0	37	0	0	40	0	2	6	0	0	1.22982	-2.70751	-0.590115	0.519372	2.63618	-2.70771	-0.520548	0.636791	2.70788
0	11272514	4.14214	-145850	-1.37839e+06	227.766	-8.64496	8.64496	-0.77499	82.8322	760.168	474.05	283.225	544.836	215.332	0	0	3	5	7	0	29	0	68	3	10	40	29	101.761	1.49649	0	0	31	0	0	28	0	8	1	0	0	0.889506	-2.78471	-0.63216	0.680511	2.7296	-2.82665	-0.537744	0.791452	2.71778
0	11577612	6.45469	-152404	-1.39424e+06	217.69	-9.17623	9.17623	-1.10367	87.6858	898.554	634.52	254.888	723.594	174.96	0	0	3	4	8	0	33	0	72	2	10	42	29	106.563	1.48004	0	0	33	0	0	30	0	8	1	0	0	0.874929	-2.77044	-0.647693	0.698461	2.7145	-2.75648	-0.53808	0.805915	2.76533
0	11374804	6.7323	-123874	-1.08728e+06	198.239	-8.85774	8.85774	-0.97277	78.0634	791.952	506.031	281.706	662.779	129.172	0	0	3	4	4	0	27	0	63	0	4	36	29	82.9969	1.31741	0	0	31	0	0	27	0	5	0	0	0	0.95675	-2.7768	-0.647693	0.698461	2.71002	-2.75534	-0.53808	0.805915	2.77405
0	11317863	4.57709	-148723	-1.34862e+06	-93.1965	-9.13544	9.13544	-0.91496	75.022	717.602	506.028	211.574	559.082	158.52	0	0	4	6	7	0	18	0	65	4	11	36	26	106.191	1.6337	0	0	27	0	1	29	0	4	4	0	0	1.23685	-2.70072	-0.630861	0.684301	2.72776	-2.88817	-0.546547	0.753571	2.66975
0	118549529	3.91188	-137083	-1.19753e+06	179.435	-8.39603	8.39603	-0.22433	75.119	794.183	578.623	215.56	629.931	164.252	0	0	3	4	6	0	17	0	64	2	8	35	23	103.022	1.60972	0	0	25	1	0	29	0	8	1	0	0	1.19089	-2.77908	-0.497049	0.484044	2.75078	-2.77684	-0.40388	0.537715	2.79596
0	122185899	3.20882	-163511	-1.58954e+06	111.358	-8.74602	8.74602	-0.41331	85.8102	846.806	606.676	240.131	635.85	210.956	0	0	3	5	8	0	17	0	73	2	10	40	25	128.255	1.75692	0	0	27	1	0	33	0	8	3	0	1	1.22817	-2.77663	-0.480028	0.56972	2.75077	-2.77646	-0.393457	0.581978	2.7951
0	122185897	5.91194	-166991	-1595361	35.2512	-8.83294	8.83294	-0.59357	83.5072	812.225	565.332	246.893	612.064	200.161	0	0	3	5	7	0	17	0	72	2	9	39	26	131.152	1.82155	0	0	26	1	1	33	0	7	3	0	1	1.20931	-2.77568	-0.515341	0.564927	2.75083	-2.77661	-0.427217	0.617102	2.79488
0	57397963	5.95631	-115441	-971554	133.035	-8.25313	8.25313	-0.97393	64.4799	626.603	355.122	267.225	474.857	151.746	0	0	3	4	4	0	20	0	51	1	5	31	23	82.816	1.62384	0	0	24	0	0	20	0	4	2	0	1	1.27579	-2.44963	-0.583948	0.634653	2.43338	-2.32153	-0.485825	0.736504	2.57964
0	66834552	3.74384	-106365	-793064	-34.0071	-8.72757	8.72757	-0.64025	58.6119	638.802	354.811	277.384	536.075	102.727	0	0	2	2	3	0	15	0	47	1	4	27	22	71.7647	1.52691	0	1	22	0	0	20	0	1	3	0	0	1.35181	-2.57807	-0.56442	0.586404	2.66788	-2.56094	-0.40989	0.755061	2.6601
0	118726565	2.26015	-148637	-1.36264e+06	135.245	-9.03979	9.03979	-0.51997	82.7814	865.775	637.219	223.167	671.266	194.509	0	0	3	4	8	0	23	0	71	1	9	39	26	109.751	1.54578	0	0	29	0	0	32	0	8	2	0	0	1.25117	-2.73606	-0.570477	0.483277	2.65237	-2.83392	-0.479102	0.592711	2.57572
0	118105664	2.66532	-162684	-1.43651e+06	53.181	-8.04609	8.04609	-0.32692	86.0038	902.583	701.05	201.533	744.17	158.413	0	0	3	4	6	0	18	0	75	3	9	40	26	124.276	1.65701	0	0	28	1	0	35	0	8	3	0	0	1.09684	-2.72406	-0.651891	0.626594	2.64307	-2.88792	-0.574432	0.677581	2.55123
0	78321238	3.40703	-153376	-1.27183e+06	-119.711	-8.02945	8.02945	-0.3359	72.772	755.135	516.63	234.798	547.741	207.395	0	0	3	4	4	0	18	0	64	2	6	35	28	106.152	1.65863	0	0	26	0	3	29	0	4	2	0	0	1.37009	-2.71351	-0.594101	0.543517	2.6136	-2.88792	-0.410043	0.678695	2.64212
0	44467255	7.21719	-183560	-1.87524e+06	4.89751	-8.40058	8.40058	-0.96792	102.327	973.423	637.366	330.97	628.705	344.718	0	0	4	6	9	0	21	0	90	5	14	46	29	145.587	1.61763	0	0	33	0	0	44	0	8	4	0	1	1.24149	-2.79071	-0.523396	0.504907	2.71735	-2.80514	-0.434858	0.529118	2.77293
0	71721648	5.55057	-164805	-1.5731e+06	-5.7681	-8.6218	8.6218	-0.53047	90.4241	875.862	641.148	234.714	731.496	144.366	0	0	4	5	7	0	18	0	79	4	11	41	28	126.964	1.60714	0	0	30	1	0	38	0	7	3	0	0	1.14802	-2.81609	-0.620046	0.646879	2.73543	-2.92342	-0.58174	0.657383	2.73655
0	72195057	1.31805	-127358	-1078980	117.474	-8.17624	8.17624	-0.81316	75.7604	768.254	496.807	256.144	710.222	58.0322	0	0	2	3	3	0	25	0	62	2	5	35	30	85.5715	1.38019	0	0	30	0	1	27	0	4	0	0	0	1.02259	-2.7473	-0.643515	0.703521	2.6413	-2.86968	-0.53808	0.805915	2.54982
0	118105704	1.28795	-197339	-1.85945e+06	-86.688	-8.28048	8.28048	-0.06647	100.119	1049.15	824.833	224.313	833.827	215.32	0	0	3	4	6	0	18	0	90	2	8	47	30	148.863	1.65403	0	0	33	0	1	43	0	8	5	0	0	1.06751	-2.72406	-0.47014	0.404766	2.65501	-2.85878	-0.420787	0.538892	2.61917
0	118549502	6.59812	-174083	-1.82632e+06	50.2954	-8.63094	8.63094	-0.49803	99.0849	917.766	615.951	301.815	677.147	240.619	0	0	3	5	7	0	17	0	87	2	9	43	30	142.335	1.63603	0	0	31	1	0	44	0	7	3	0	1	1.18893	-2.83355	-0.479293	0.431763	2.76568	-2.80595	-0.356825	0.544638	2.86414
0	68165403	4.46865	-149072	-1.42017e+06	-0.56534	-8.32432	8.32432	-0.45521	87.2985	813.826	584.37	229.456	690.826	123	0	0	3	4	5	0	18	0	74	2	7	38	27	121.267	1.63874	0	0	28	1	0	36	0	6	2	1	0	1.1054	-2.79243	-0.610852	0.613171	2.76682	-2.84331	-0.544039	0.730913	2.76166
0	66834447	6.62072	-107813	-823110	39.5718	-8.70574	8.70574	-0.6197	63.0899	675.879	326.379	344.135	585.205	90.6742	0	0	2	2	2	0	21	0	49	1	3	29	25	70.5858	1.44053	0	1	25	0	0	20	0	1	2	0	0	1.28019	-2.57671	-0.584599	0.60551	2.58695	-2.51942	-0.485362	0.80221	2.65606
0	11846149	4.19997	-87395.7	-558439	129.259	-8.35868	8.35868	-2.42364	45.0819	520.102	223.668	290.674	385.048	135.054	0	0	2	2	3	0	9	0	32	3	6	22	15	56.0258	1.75081	0	0	16	0	0	10	1	3	2	0	0	1.57948	-2.21988	-0.621733	0.664886	2.36256	-2.19358	-0.504705	0.784416	2.46022
0	57340671	5.29122	-163553	-1403227	-31.2589	-8.58541	8.58541	-0.64084	77.6968	803.911	572.545	231.365	631.137	172.774	0	0	3	4	5	0	18	0	68	1	6	38	27	113.952	1.67577	0	0	27	0	3	30	0	7	1	0	0	1.19513	-2.7839	-0.447914	0.518871	2.67452	-2.88007	-0.362469	0.619124	2.62101
0	5326739	3.77358	-79705.1	-516189	110.348	-8.17772	8.17772	-2.19978	40.3987	475.802	246.794	223.596	331.38	144.422	1	1	0	0	3	0	9	0	32	3	6	21	14	51.1914	1.59973	0	0	16	0	0	11	0	3	2	0	0	1.57177	-2.22724	-0.615421	0.664613	2.35781	-2.19469	-0.527453	0.746224	2.45377
0	6538812	5.02333	-93628.8	-650551	79.5033	-8.32942	8.32942	-2.26452	46.0543	532.644	274.255	252.489	405.955	126.689	0	0	1	1	3	0	9	0	37	2	5	24	15	60.0756	1.62367	0	0	18	0	0	13	0	3	3	0	0	1.54797	-2.24153	-0.551739	0.605127	2.36344	-2.29204	-0.45274	0.693303	2.45647
0	46889932	6.20229	-121220	-989876	167.947	-8.65925	8.65925	-0.4318	65.8554	716.142	512.326	203.816	597.574	118.568	0	0	2	3	6	0	14	0	57	2	8	30	18	93.6542	1.64306	0	1	20	0	0	27	0	8	1	0	0	1.16122	-2.74475	-0.298759	0.434406	2.65732	-2.87056	-0.210217	0.551977	2.59239
0	25093323	2.35177	-83113.3	-557063	174.127	-6.89842	6.89842	-0.8942	44.4639	535.455	302.613	229.854	427.945	107.51	1	0	0	1	3	0	6	0	37	3	6	22	15	58.5368	1.58207	0	0	16	0	0	15	0	5	1	0	0	1.58556	-2.39119	-0.646303	0.744042	2.39668	-2.53934	-0.53808	0.840915	2.45241
0	91896030	6.72521	-106569	-794779	37.9009	-8.74358	8.74358	-0.22213	55.3419	622.498	425.37	197.128	494.854	127.645	0	0	3	5	6	0	17	0	47	2	8	27	20	75.4337	1.60497	0	0	20	0	0	20	0	4	3	0	0	1.46508	-2.52057	-0.616788	0.736977	2.60868	-2.58289	-0.582474	0.639712	2.7246
0	90967078	2.58642	-84599.6	-594837	136.048	-8.7267	8.7267	-0.54557	47.5507	538.38	361.001	177.379	496.237	42.1435	0	0	3	3	4	0	17	0	39	0	4	23	18	59.072	1.51467	0	0	18	0	0	16	0	4	1	0	0	1.43184	-2.41906	-0.577126	0.61235	2.60839	-2.32365	-0.455058	0.701035	2.72455
0	70674636	2.2682	-160462	-1.16535e+06	-107.38	-8.94746	8.94746	-0.6464	67.2044	780.19	450.133	330.057	540.144	240.045	0	0	3	4	4	0	18	0	57	3	7	35	23	108.061	1.8958	0	0	23	1	3	22	0	6	2	0	0	1.22133	-2.65713	-0.586607	0.638346	2.60157	-2.78187	-0.426023	0.771435	2.50288
0	25093328	4.88661	-75115	-506056	193.555	-8.73591	8.73591	-0.35472	42.3283	498.007	351.004	141.708	387.153	110.854	0	0	2	2	4	0	20	0	34	2	6	21	16	49.2584	1.44878	0	0	16	0	0	13	0	5	0	0	0	1.44673	-2.21404	-0.622396	0.721658	2.27688	-2.14165	-0.53808	0.805915	2.44568
0	122187565	4.65184	-115538	-837816	-62.363	-8.85918	8.85918	-0.56346	56.727	633.689	419.157	214.531	317.15	316.538	0	0	3	5	5	0	6	0	50	4	9	26	13	88.6439	1.77288	0	0	16	2	0	24	0	6	2	0	0	2.02956	-2.71791	-0.640387	0.665338	2.62159	-2.89617	-0.613599	0.685241	2.54134
0	122186227	5.21775	-111940	-753114	-49.5545	-8.76866	8.76866	-0.4608	53.6334	748.311	447.033	301.278	323.704	424.606	0	0	3	5	5	0	6	0	47	4	9	25	12	84.845	1.80521	0	0	15	2	0	22	0	6	2	0	0	2.03263	-2.71791	-0.640378	0.665346	2.62158	-2.89617	-0.613849	0.685241	2.47605
0	122182193	4.21434	-150076	-1.11583e+06	-203.713	-9.34924	9.34924	-1.09544	71.0154	893.759	483.284	410.475	509.606	384.153	0	0	3	5	7	0	12	0	61	6	13	34	19	111.776	1.83239	0	0	22	1	0	27	0	4	6	0	1	1.55409	-2.60937	-0.62709	0.659411	2.58625	-2.82745	-0.53808	0.68759	2.55214
0	122179546	4.2288	-145470	-1.10833e+06	-251.292	-9.36303	9.36303	-1.31278	70.1626	803.285	493.846	309.439	477.5	325.785	0	0	3	5	7	0	6	0	63	6	13	32	17	113.04	1.79429	0	0	20	1	0	31	0	4	6	0	1	2.1378	-2.62759	-0.592833	0.588858	2.6707	-2.85045	-0.567076	0.597522	2.65865
0	12133302	3.78263	-145467	-1.06692e+06	-249.01	-9.36849	9.36849	-1.20645	70.1626	900.322	541.571	358.751	484.391	415.931	0	0	3	5	7	0	6	0	63	6	13	32	17	113.04	1.79429	0	0	20	1	0	31	0	4	6	0	1	2.1378	-2.62759	-0.592833	0.588858	2.6707	-2.85045	-0.567076	0.597522	2.65865
0	1194266	2.89307	-104501	-834488	-10.2285	-8.15834	8.15834	-0.63	57.8019	608.325	381.363	226.962	460.715	147.61	0	0	3	4	4	0	12	0	47	1	5	27	20	75.6336	1.60922	0	0	21	0	0	20	0	2	3	0	1	1.65471	-2.5096	-0.641568	0.624862	2.54658	-2.47741	-0.545944	0.725171	2.63891
0	118987674	6.51535	-98397.7	-819277	77.3496	-8.17981	8.17981	-0.70244	61.0582	609.806	387.765	222.041	503.759	106.047	0	0	2	3	2	0	12	0	50	0	2	27	21	75.2885	1.50577	0	0	22	0	0	23	0	3	1	0	1	1.60232	-2.51942	-0.592635	0.551088	2.54573	-2.53932	-0.479297	0.667193	2.63521
0	118905474	3.72054	-96425.9	-583914	-86.8076	-9.16968	9.16968	-0.24178	40.2865	506.375	78.9189	98.27	371.418	134.958	0	0	1	2	2	0	6	0	37	2	4	20	14	62.4023	1.68655	0	0	13	0	3	17	0	4	0	0	0	1.58286	-2.79518	-0.469331	0.530025	2.74257	-2.76052	-0.441127	0.574078	2.81993
0	118905413	3.15639	-131821	-995237	2.18115	-8.63586	8.63586	-0.73465	61.4065	673.918	316.245	335.199	549.489	124.429	0	0	2	3	2	0	26	0	49	2	4	32	26	76.7826	1.56699	0	0	25	0	3	17	0	4	0	0	0	1.25132	-2.3047	-0.612151	0.656369	2.38336	-2.22583	-0.508378	0.738901	2.48621
0	118737463	3.72793	-132505	-954269	-65.8668	-8.74775	8.74775	-0.80137	56.9353	644.207	386.027	258.18	462.944	181.263	0	0	2	3	3	0	18	0	48	2	5	30	21	84.4164	1.75867	0	0	21	0	3	18	0	5	1	0	0	1.3676	-2.50545	-0.586801	0.620839	2.51154	-2.51142	-0.529609	0.717046	2.56439
0	118735492	2.7664	-105694	-586095	-133.422	-8.79919	8.79919	-0.57121	34.7961	469.464	268.284	201.179	212.458	257.006	0	0	1	1	4	0	12	0	30	2	6	21	12	60.903	2.0301	0	0	12	0	3	9	0	4	2	0	0	1.49115	-2.25317	-0.593476	0.614793	2.3757	-2.34886	-0.515974	0.729039	2.49391
0	118729117	3.72372	-109969	-651870	-117.641	-8.69099	8.69099	-0.59356	40.6145	515.384	291.118	224.266	237.141	278.243	0	0	2	2	3	0	12	0	35	3	6	23	14	66.8379	1.90965	0	0	14	0	3	12	0	5	1	0	0	1.48213	-2.50534	-0.560444	0.552637	2.51149	-2.51143	-0.512549	0.642347	2.56409
0	118729116	4.31777	-110555	-697127	0.14669	-8.74594	8.74594	-0.45643	43.3393	552.631	319.574	227.543	297.592	255.038	0	0	4	5	4	0	15	0	37	4	8	24	15	65.776	1.77773	0	0	15	0	3	13	0	6	0	0	0	1.38297	-2.30409	-0.587237	0.655087	2.75216	-2.37766	-0.507853	0.743403	2.79739
0	118796628	4.2161	-74353.5	-474807	-10.6646	-9.32924	9.32924	0.25418	37.7927	453.761	308.918	144.843	256.598	197.163	0	0	2	2	5	0	6	0	34	5	10	18	8	55.9542	1.64571	0	0	12	0	0	16	0	4	2	0	0	1.60099	-2.62663	-0.634894	0.697698	2.75827	-2.93545	-0.578512	0.687873	2.55661
0	118796579	6.77499	-119923	-962824	-30.7831	-9.5053	9.5053	-0.55582	62.1307	662.997	348.93	314.067	420.177	242.82	0	0	3	5	6	0	18	0	51	3	9	30	22	86.1926	1.69005	0	0	22	0	0	21	0	3	4	0	1	1.52608	-2.50044	-0.660369	0.75035	2.64127	-2.5726	-0.561325	0.76885	2.78528
0	91970531	6.69801	-123498	-981880	8.06475	-8.45847	8.45847	-0.71788	65.2242	710.632	394.968	315.664	523.587	187.045	0	0	3	5	5	0	18	0	54	2	7	31	22	89.9252	1.66528	0	0	23	0	0	23	0	3	4	0	1	1.42214	-2.46799	-0.629495	0.70942	2.57069	-2.57228	-0.53808	0.805915	2.66019
0	663060	3.27076	-122810	-922338	-33.4376	-8.7002	8.7002	-0.15184	67.7474	747.217	469.182	278.035	661.023	86.1935	0	0	2	3	3	0	12	0	57	1	4	30	24	91.296	1.60168	0	0	23	2	0	27	0	3	2	0	0	1.06259	-2.77482	-0.573485	0.524765	2.67794	-2.88346	-0.457261	0.662516	2.64273
0	1477263	3.33736	-69067.7	-424362	-69.5258	-8.86392	8.86392	-0.19096	40.0199	506.35	353.647	152.703	357.921	148.43	1	0	0	1	2	0	6	0	37	1	3	17	12	54.2055	1.46501	0	0	13	0	0	20	0	2	2	0	0	2.14654	-2.66837	-0.227273	0.123921	2.57108	-2.74612	-0.0545227	0.257143	2.52156
0	45115594	0.872259	-60854.7	-461332	11.3133	-8.76351	8.76351	0.25912	45.7362	458.03	323.686	134.344	457.59	0.440507	0	0	1	2	1	0	5	0	40	0	1	17	16	50.2318	1.2558	0	0	15	0	0	23	0	1	0	0	1	1.78073	-2.86713	-0.57977	0.558206	2.79038	-2.79567	-0.464424	0.661704	2.92746
0	3091265	2.44596	-64235.7	-411971	-14.7997	-9.50574	9.50574	0.09179	37.6307	416.828	256.457	160.371	382.933	33.8952	0	0	1	2	2	0	6	0	32	1	3	16	13	47.8943	1.4967	0	0	13	1	0	16	0	1	1	0	0	2.18465	-2.72641	-0.622238	0.643607	2.72856	-2.71228	-0.452	0.685485	2.81544
0	2003392	1.36356	-77502.2	-508366	82	-8.26253	8.26253	-0.41912	43.8303	524.255	344.366	179.889	441.715	82.5409	0	0	2	3	4	0	18	0	34	0	4	21	16	56.1131	1.65039	0	0	16	0	0	13	0	3	1	0	1	1.55919	-2.23643	-0.647194	0.656563	2.22203	-2.24575	-0.53808	0.805915	2.4148
0	45479165	4.28011	-109214	-826624	277.051	-9.49069	9.49069	-1.25023	55.9815	627.934	263.112	333.674	543.988	83.9458	0	0	3	4	6	0	28	0	41	0	6	29	20	70.55	1.72073	0	0	20	1	0	12	0	7	0	0	1	1.29545	-2.19593	-0.629316	0.692881	2.24366	-2.09924	-0.521192	0.856712	2.40639
0	1487221	0.912215	-97909.1	-715855	89.43	-8.02083	8.02083	-0.55512	51.8727	587.698	370.636	217.061	502.663	85.0343	0	0	3	3	4	0	17	0	42	1	5	26	17	66.0388	1.57235	0	0	20	0	0	16	0	4	2	0	0	1.2962	-2.33242	-0.585173	0.616036	2.35961	-2.29906	-0.501253	0.71469	2.50833
0	44608030	1.41299	-63578.6	-381376	112.806	-8.33254	8.33254	-0.41704	38.1747	477.208	267.809	209.399	421.251	55.9573	0	0	1	1	2	0	17	0	29	1	3	18	14	44.7698	1.54379	0	0	14	0	0	11	0	3	0	0	1	1.43343	-2.246	-0.608649	0.690887	2.19579	-2.13171	-0.505539	0.811427	2.39306
0	16295797	7.11253	-134725	-1.24724e+06	-30.9117	-9.24951	9.24951	-0.51374	81.2238	743.112	452.311	290.801	576.942	166.17	0	0	3	4	4	0	18	0	70	2	6	35	27	105.409	1.50585	0	0	28	0	0	35	0	3	3	0	1	1.33535	-2.75121	-0.575563	0.58353	2.66128	-2.80098	-0.53808	0.673792	2.68221
0	972317	6.19849	-131827	-981305	36.2934	-8.97074	8.97074	-1.01235	62.8103	748.373	452.822	295.551	565.34	183.033	0	0	3	5	6	0	23	0	50	2	8	32	17	95.1858	1.90372	0	0	20	0	0	18	0	6	4	0	2	1.19965	-2.32683	-0.592731	0.696576	2.50156	-2.43328	-0.508743	0.77588	2.43186
0	3379829	4.03562	-78329.6	-509494	72.9167	-7.74233	7.74233	-0.95893	45.5835	535.551	272.356	257.659	439.328	96.2232	0	0	2	2	2	0	16	0	34	1	3	22	18	52.8955	1.55575	0	0	18	0	0	12	0	2	1	0	1	1.32546	-2.26188	-0.671643	0.710906	2.32061	-2.19407	-0.520029	0.808976	2.46669
0	44665681	4.39149	-87203.7	-562041	30.0391	-9.32341	9.32341	-0.68427	44.5723	540.525	254.36	286.165	415.943	124.582	0	0	2	2	3	0	17	0	35	2	5	22	17	57.9323	1.65521	0	0	17	1	0	13	0	2	2	0	0	1.67811	-2.2929	-0.634619	0.701889	2.27477	-2.15264	-0.53808	0.809943	2.41821
0	3476	2.28441	-107848	-885868	-100.298	-9.11629	9.11629	-0.91555	66.8362	658.794	395.929	252.193	462.588	196.206	0	0	2	3	3	0	16	0	57	3	6	29	25	70.9025	1.2439	0	0	26	0	0	28	0	0	3	0	0	1.38067	-2.79333	-0.585002	0.625835	2.74189	-2.69667	-0.489229	0.615128	2.84489
0	44394970	1.6137	-108837	-754348	52.8857	-8.10242	8.10242	-0.82627	54.2655	623.056	243.552	375.198	521.826	101.23	0	0	2	3	3	0	21	0	39	2	5	27	22	70.6726	1.81212	0	0	20	2	0	12	0	2	2	0	1	1.42256	-2.20651	-0.654584	0.681583	2.2433	-2.13594	-0.511251	0.833176	2.45335
0	5503	1.42886	-116217	-822521	21.8886	-8.86679	8.86679	-1.01486	55.0675	616.235	259.43	353.839	472.804	143.431	0	0	3	4	4	0	21	0	40	2	6	28	21	74.6641	1.8666	0	0	20	2	0	12	0	2	3	0	1	1.47236	-2.20442	-0.642206	0.679675	2.32008	-2.14072	-0.53808	0.805915	2.4205
0	91610	3.3122	-111598	-936315	-3.17298	-8.5044	8.5044	-0.79251	71.7406	724.7	409.347	299.792	592.805	131.895	0	0	2	2	2	0	22	0	58	2	4	32	29	68.3447	1.17836	0	0	30	0	0	26	0	0	2	0	0	1.25251	-2.66462	-0.645935	0.698666	2.62087	-2.56821	-0.53808	0.805915	2.72558
0	4932	3.48529	-99107	-746515	30.1145	-8.55976	8.55976	-0.95726	63.367	711.339	395.88	313.799	569.33	142.009	0	0	2	3	2	0	12	0	52	2	4	28	25	62.1723	1.19562	0	0	26	0	0	24	0	0	2	0	0	1.41666	-2.66297	-0.644342	0.693302	2.61149	-2.53166	-0.53808	0.754371	2.74663
0	9835694	2.68289	-119112	-829516	61.4303	-8.92834	8.92834	-1.09098	54.3607	655.002	263.265	387.742	476.975	178.027	0	0	3	4	4	0	21	0	40	2	6	29	20	71.0749	1.77687	0	0	21	2	0	11	0	3	3	0	0	1.45611	-2.20392	-0.676266	0.697777	2.25126	-2.13621	-0.53808	0.805915	2.44042
0	219048	5.04147	-123589	-894766	-1.70768	-9.26012	9.26012	-1.20289	55.8695	631.743	246.003	383.023	485.688	146.055	0	0	3	5	5	0	21	0	41	2	7	29	21	78.2015	1.90735	0	0	20	2	0	12	0	2	4	0	1	1.52469	-2.28997	-0.633486	0.684995	2.40837	-2.25543	-0.521265	0.784823	2.4629
0	9948052	2.70032	-107947	-757564	41.7603	-8.70801	8.70801	-0.8021	54.4591	614.783	262.517	347.984	519.701	95.0819	0	0	2	3	3	0	21	0	41	2	5	27	22	68.118	1.66141	0	0	21	2	0	14	0	2	2	0	0	1.42256	-2.29103	-0.637703	0.665762	2.34923	-2.21755	-0.520352	0.786112	2.46477
0	71681826	3.14882	-95424.3	-709905	71.7113	-8.73506	8.73506	-0.50766	56.8314	631.72	402.932	223.046	566.722	64.9984	0	0	2	3	3	0	16	0	48	1	4	26	20	69.732	1.45275	0	0	21	0	0	22	0	4	1	0	0	1.16559	-2.74418	-0.653662	0.680427	2.66163	-2.86309	-0.550519	0.777006	2.57531
0	134138062	3.17134	-84621.2	-653528	-3.12313	-9.64128	9.64128	0.31806	60.8662	675.851	394.156	231.575	462.767	213.084	0	0	2	3	1	0	0	0	56	1	2	23	20	66.5082	1.18765	0	0	21	0	0	33	0	1	1	0	0	2.24525	-2.92544	-0.314776	0.268984	2.86959	-2.82833	-0.242257	0.274802	2.97082
0	21309795	3.61311	-114838	-979075	-33.1254	-8.30533	8.30533	0.00844	73.995	776.726	523.005	253.721	697.169	79.5562	0	0	2	3	2	0	17	0	65	0	2	31	25	86.0982	1.32459	0	0	27	0	0	34	0	2	2	0	0	1.5154	-2.69378	-0.543773	0.607082	2.67375	-2.59963	-0.460544	0.694988	2.7905
0	67705376	4.31599	-119631	-956313	2.69816	-8.42547	8.42547	-0.30375	69.4626	758.776	496.236	262.539	676.86	81.9159	0	0	2	3	3	0	23	0	58	0	3	32	25	82.4146	1.42094	0	0	27	0	0	26	0	2	3	0	0	1.26697	-2.51214	-0.638742	0.698354	2.53633	-2.52262	-0.53808	0.805915	2.55716
0	10710505	5.18444	-129397	-982857	-114.159	-8.46776	8.46776	-0.38414	67.5882	765.757	483.597	282.161	688.027	77.7307	0	0	2	3	2	0	17	0	59	0	2	31	25	90.3736	1.53176	0	0	25	0	2	28	0	2	2	0	0	1.5285	-2.65879	-0.633003	0.644548	2.62195	-2.52496	-0.481018	0.765938	2.76814
0	56587985	3.19165	-142574	-1222255	-20.3086	-8.31617	8.31617	-0.01505	82.692	879.724	541.461	338.263	805.466	74.2582	0	0	2	3	2	0	23	0	71	1	3	37	30	103.323	1.45526	0	0	31	0	1	34	0	3	2	0	0	1.20673	-2.7137	-0.617216	0.667659	2.66357	-2.72858	-0.504965	0.771128	2.77207
0	71476419	4.92755	-107654	-882108	-22.6895	-8.31725	8.31725	0.01512	67.8078	735.097	503.707	231.39	643.842	91.2557	0	0	2	3	2	0	17	0	59	0	2	29	23	79.7728	1.35208	0	0	25	0	0	30	0	2	2	0	0	1.58522	-2.6314	-0.612766	0.653232	2.60589	-2.51427	-0.503507	0.707427	2.74071
0	10587622	3.93895	-93271.2	-627558	12.5024	-9.3192	9.3192	-1.07106	55.4334	665.135	438.508	226.627	575.319	89.816	0	0	2	3	3	0	17	0	47	0	3	25	18	66.7195	1.41956	0	0	21	0	0	22	0	2	2	0	0	1.21438	-2.65923	-0.610164	0.662322	2.61658	-2.52149	-0.505338	0.765507	2.75638
0	15192338	2.32226	-146405	-1.03027e+06	-133.795	-9.3001	9.3001	-0.69607	67.0044	777.704	419.348	349.231	572.49	205.214	0	0	3	4	4	0	22	0	56	1	5	34	27	93.3832	1.66756	0	0	26	0	3	22	0	3	2	0	0	1.06243	-2.53627	-0.628762	0.658319	2.53898	-2.56432	-0.529222	0.762812	2.59502
0	15192341	6.71252	-127393	-818353	-48.7019	-9.71327	9.71327	-1.27779	55.1685	667.347	348.69	313.25	467.77	199.577	0	0	3	4	4	0	21	0	46	0	4	29	21	79.6034	1.73051	0	0	21	0	3	17	0	4	1	0	0	1.08842	-2.57438	-0.645415	0.649232	2.5649	-2.48721	-0.53808	0.725153	2.65538
0	45269616	5.67744	-123432	-877113	131.231	-8.80389	8.80389	-0.84656	64.9061	745.336	401.126	334.734	640.959	104.378	0	0	3	4	5	0	27	0	51	2	7	32	24	80.877	1.58582	0	0	25	1	1	19	0	5	0	0	0	0.978142	-2.5134	-0.652992	0.695201	2.51493	-2.46178	-0.520335	0.849582	2.57282
0	11595259	5.75474	-133278	-1073295	19.7534	-8.24599	8.24599	-1.21541	71.2154	771.958	404.74	347.845	649.037	122.922	0	0	3	4	4	0	24	0	56	2	6	34	27	95.3832	1.70327	0	0	26	1	0	22	0	3	3	0	1	1.1562	-2.55819	-0.646783	0.624472	2.4975	-2.73977	-0.576385	0.749558	2.46906
0	15192339	4.51577	-58416.9	-300573	-70.052	-10.8935	10.8935	-0.16705	23.9627	334.652	200.146	134.506	192.138	142.514	1	0	0	1	1	0	0	0	23	1	2	12	8	38.3367	1.66681	0	0	7	0	0	11	0	1	4	0	0	1.95224	-2.66017	-0.583254	0.554644	2.91108	-2.63268	-0.536299	0.586101	2.92839
0	10708341	1.8294	-89402.2	-474611	-147.795	-11.8192	11.8192	-0.56342	25.8439	394.164	167.313	226.851	118.121	276.043	1	0	0	1	2	0	0	0	26	2	4	16	8	47.4824	1.82625	0	0	6	0	0	10	0	2	8	0	0	2.50841	-2.74327	-0.543795	0.642187	2.79649	-2.86691	-0.63745	0.496211	2.71474
0	65124	3.4724	-98116.2	-579441	-269.026	-9.04973	9.04973	0.4794	39.9475	545.721	328.291	217.43	155.607	390.115	0	0	3	5	7	0	0	0	37	7	14	20	6	69.779	1.88592	0	0	10	0	0	17	0	3	6	0	1	4.08221	-2.56999	-0.545072	0.46013	2.60693	-2.80059	-0.539312	0.392009	2.54254
0	449159	1.51435	-49923.1	-200701	-183.345	-10.2082	10.2082	0.3108	17.1556	290.261	179.342	110.92	47.8518	242.41	0	0	2	3	5	0	0	0	16	4	9	9	2	31.5936	1.9746	0	0	3	0	0	7	0	1	4	0	1	3.39809	-2.42676	-0.64721	0.517227	2.57875	-2.76796	-0.67223	0.547188	2.30583
0	2796	6.98646	-112666	-921111	117.053	-8.4646	8.4646	-1.58227	60.6727	637.225	345.771	274.657	523.749	113.475	0	0	3	3	4	0	20	0	47	0	4	31	21	70.9693	1.50998	0	0	25	0	0	16	0	4	2	0	0	1.3201	-2.41433	-0.655325	0.659383	2.4407	-2.58295	-0.524021	0.786146	2.49947
0	101882899	4.0857	-95508.8	-675710	-320.755	-9.60528	9.60528	2.45787	45.4618	491.185	363.465	127.719	272.277	218.908	0	0	2	4	7	0	0	0	45	7	14	20	13	67.4215	1.49826	0	0	13	0	0	25	0	1	6	0	0	2.05831	-2.84336	-0.67791	0.740096	2.8615	-3.00532	-0.737812	0.571663	2.8023
0	70696726	2.95044	-97595.2	-653092	-222.436	-9.53989	9.53989	-0.08747	46.1359	537.207	308.144	229.063	344.485	192.722	0	0	3	5	6	0	6	0	41	6	12	21	15	68.3085	1.66606	0	1	14	0	0	20	0	1	5	0	0	1.89665	-2.80192	-0.658841	0.718644	2.84938	-2.98122	-0.705954	0.615981	2.68746
0	70684192	4.16241	-111231	-771017	52.9846	-8.71113	8.71113	-1.31687	58.6615	692.518	368.112	324.406	554.486	138.033	0	0	3	4	4	0	15	0	46	2	6	29	21	76.9797	1.67347	0	0	22	0	0	17	0	3	3	0	1	1.13196	-2.33526	-0.620087	0.629044	2.30375	-2.6056	-0.53808	0.736144	2.40227
0	118718373	24.632	-136762	-1104189	-343.908	-6.70322	6.70322	-2.4	78.6177	881.139	672.623	208.516	591.606	289.533	0	0	3	5	6	1	0	1	75	5	11	30	22	106.411	1.41881	0	0	22	1	0	45	0	0	6	0	1	3.6152	-2.73654	-0.613777	0.644828	2.88502	-2.996	-0.630765	0.494888	2.8357
0	44320078	3.30944	-113219	-818505	-376.054	-9.57314	9.57314	0.64415	48.8258	543.874	419.341	124.533	267.819	276.055	0	0	3	5	9	0	0	0	48	7	16	23	13	74.6788	1.55581	0	0	14	0	0	25	0	1	8	0	0	2.07629	-2.77747	-0.580355	0.673066	2.80117	-2.97758	-0.668333	0.533927	2.62548
0	73356409	3.23954	-189324	-1.90932e+06	-82.9161	-8.90524	8.90524	-1.38978	102.503	978.664	566.734	411.93	785.685	192.978	0	0	3	4	5	0	18	0	85	0	5	48	37	128.408	1.51068	0	0	39	1	0	37	0	2	6	0	0	1.13309	-2.93801	-0.577539	0.653075	2.91677	-2.89874	-0.489234	0.789963	2.97324
0	118718371	4.23	-90818.6	-596099	124.493	-8.79149	8.79149	-1.19195	52.0103	630.726	289.9	340.826	522.63	108.096	0	0	2	3	3	0	20	0	38	1	4	25	19	63.85	1.68026	0	0	19	0	0	13	0	3	1	0	2	1.15496	-2.21634	-0.637188	0.690936	2.22692	-2.35496	-0.520724	0.791817	2.40224
0	16736930	7.62701	-112431	-759856	17.9005	-9.40508	9.40508	-1.16606	57.4707	691.3	402.896	288.404	520.049	171.252	0	0	2	3	3	0	17	0	49	0	3	28	19	77.8886	1.58956	0	0	21	0	0	21	0	3	4	0	0	1.19411	-2.65891	-0.632882	0.711638	2.61698	-2.52147	-0.53808	0.805915	2.75655
0	16736629	6.64733	-129489	-863005	-141.21	-9.32794	9.32794	-1.08367	58.1977	693.455	395.936	297.52	519.087	174.369	0	0	2	3	3	0	17	0	50	0	3	29	22	83.0918	1.66184	0	0	22	0	3	21	0	2	2	0	0	1.25878	-2.65915	-0.530803	0.592965	2.61988	-2.52264	-0.435869	0.689693	2.75805
0	101874278	1.81193	-101348	-714257	10.2225	-8.05586	8.05586	-1.08253	61.427	722.689	459.11	263.58	600.121	122.569	0	0	2	3	3	0	17	0	51	0	3	27	20	77.1471	1.51269	0	0	22	0	0	24	0	2	2	0	1	1.19591	-2.65925	-0.569987	0.62818	2.61667	-2.52151	-0.472596	0.775918	2.75653
0	101874279	2.11409	-108844	-769942	46.6937	-9.03905	9.03905	-1.11462	60.1819	702.648	430.965	271.683	613.636	89.0115	0	0	3	4	4	0	23	0	49	0	4	29	21	71.8882	1.46711	0	0	24	0	0	20	0	2	3	0	0	1.08316	-2.43559	-0.6437	0.698241	2.46926	-2.39659	-0.53808	0.805915	2.51751
0	118709576	2.89916	-108842	-769772	32.0627	-8.92664	8.92664	-1.07849	60.1819	709.954	425.916	284.038	617.36	92.594	0	0	3	4	4	0	23	0	49	0	4	29	21	71.8882	1.46711	0	0	24	0	0	20	0	2	3	0	0	1.08316	-2.4295	-0.643042	0.697643	2.46796	-2.39454	-0.53808	0.805915	2.51621
0	117611892	3.4472	-101345	-724570	13.5708	-8.09898	8.09898	-1.05536	61.427	708.918	446.643	262.275	594.756	114.162	0	0	2	3	3	0	17	0	51	0	3	27	20	77.1471	1.51269	0	0	22	0	0	24	0	2	2	0	1	1.23027	-2.65928	-0.56477	0.609912	2.61742	-2.52159	-0.444869	0.737956	2.75751
0	1073725	0.754357	-193982	-1954383	-126.374	-8.97385	8.97385	-0.20939	104.473	1024.75	665.714	355.748	848.889	175.865	0	0	2	4	8	0	18	0	92	3	11	48	33	139.551	1.51686	0	0	37	0	0	44	0	4	7	0	0	1.19695	-2.69896	-0.562785	0.549576	2.76716	-2.86134	-0.528672	0.577458	2.6203
0	637568	3.82688	-162114	-1.4824e+06	-198.07	-9.56151	9.56151	-0.53327	76.1534	762.481	497.324	265.157	595.466	167.015	0	0	2	4	8	0	11	0	69	3	11	37	19	113.392	1.64336	0	0	25	0	0	32	0	4	8	0	0	1.61652	-2.58697	-0.49179	0.452995	2.76735	-2.86189	-0.433439	0.421444	2.61978
0	134151181	2.62638	-177264	-1.79421e+06	-95.0696	-8.81143	8.81143	-0.63261	97.4769	914.095	558.331	355.764	805.356	108.739	0	0	3	5	6	0	18	0	84	3	9	45	32	124.442	1.48145	0	0	36	0	0	39	0	3	6	0	0	1.22424	-2.58778	-0.569799	0.581886	2.76713	-2.83939	-0.512773	0.629776	2.61998
0	118952751	4.84371	-164862	-1.52537e+06	-250.606	-9.74347	9.74347	-0.42507	76.1025	763.813	547.026	216.787	553.628	210.185	0	0	2	4	8	0	5	0	72	3	11	36	18	117.546	1.63258	0	0	23	0	0	36	0	4	9	0	0	1.99594	-2.67589	-0.445678	0.367918	2.77849	-2.86297	-0.416138	0.336134	2.70723
0	122194810	2.12628	-193981	-2.00577e+06	-147.931	-8.99247	8.99247	-0.23597	104.473	981.588	651.179	327.664	827.433	154.155	0	0	2	4	8	0	18	0	92	3	11	48	33	139.551	1.51686	0	0	37	0	0	44	0	4	7	0	0	1.19695	-2.69896	-0.562785	0.549576	2.76716	-2.86134	-0.528672	0.577458	2.6203
0	118170474	2.46215	-179209	-1.84523e+06	-150.868	-8.8308	8.8308	-0.62167	101.478	952.915	615.884	337.031	829.911	123.004	0	0	3	5	6	0	12	0	90	3	9	45	32	130.751	1.45279	0	0	36	0	0	45	0	3	6	0	0	1.22406	-2.81949	-0.561729	0.562581	2.80315	-2.84553	-0.492623	0.585726	2.89405
0	73330369	4.73757	-177251	-1.8269e+06	-8.33783	-8.54329	8.54329	-0.6205	98.8681	931.693	523.794	403.798	776.621	155.072	0	0	4	6	5	0	21	0	84	4	9	46	33	125.174	1.49017	0	0	37	0	0	38	0	4	5	0	0	1.11751	-2.58474	-0.556869	0.596108	2.76716	-2.83903	-0.484215	0.678789	2.62
0	76333050	6.78867	-196240	-2.19259e+06	-69.4385	-8.74687	8.74687	-0.59715	110.704	922.636	554.541	365.559	807.498	115.137	0	0	3	5	6	0	24	0	94	3	9	51	38	136.06	1.44745	0	0	42	0	0	43	0	3	6	0	0	1.08071	-2.58786	-0.589546	0.602381	2.76715	-2.83938	-0.519696	0.67873	2.6203
0	137652956	6.4335	-204239	-2.4986e+06	-271.435	-9.53098	9.53098	0.35272	121.018	927.528	601.442	276.445	723.115	204.413	0	0	3	5	7	0	12	0	109	3	10	51	37	160.686	1.47418	1	0	40	0	0	58	0	3	7	0	0	1.11099	-2.98839	-0.518121	0.574873	2.98644	-2.96053	-0.477805	0.609457	3.01522
0	91885637	2.78552	-153889	-1.34e+06	-213.974	-9.93039	9.93039	-0.44764	72.207	756.459	493.036	263.422	565.279	191.18	0	0	2	4	8	0	5	0	68	3	11	34	17	110.866	1.63039	0	0	22	0	0	34	0	4	8	0	0	2.00922	-2.67589	-0.42287	0.321455	2.77849	-2.86298	-0.388478	0.326402	2.70723
0	134143193	4.36435	-193985	-2.02099e+06	-40.7284	-8.39299	8.39299	-0.06773	105.864	1006.43	654.382	345.413	852.582	153.848	0	0	3	5	7	0	21	0	92	4	11	49	34	140.298	1.52497	0	0	38	0	0	43	0	5	6	0	0	1.08924	-2.69895	-0.557816	0.600435	2.76718	-2.8612	-0.512194	0.682833	2.62031
0	137638786	6.67564	-127920	-1.01616e+06	-144.424	-9.16042	9.16042	-0.67209	60.4082	666.909	371.565	295.344	479.571	187.338	0	0	3	5	7	0	6	0	53	5	12	30	17	87.0345	1.64216	0	0	21	0	0	23	0	3	6	0	0	1.57916	-2.56342	-0.599025	0.61189	2.76711	-2.82928	-0.535196	0.59252	2.61974
0	4578	6.41627	-175009	-1.81538e+06	-82.3453	-8.65845	8.65845	-0.05248	92.6369	825.437	550.736	271.139	659.712	165.726	0	0	3	5	7	0	15	0	82	4	11	43	28	128.069	1.56182	0	0	32	0	0	39	0	5	6	0	0	1.2352	-2.69895	-0.540189	0.576411	2.76717	-2.8612	-0.461236	0.653352	2.62
0	44366376	4.15877	-175007	-1.73713e+06	-161.225	-9.14346	9.14346	0.15307	91.2457	860.958	590.227	270.731	716.905	144.053	0	0	2	4	8	0	12	0	82	3	11	42	27	127.211	1.55135	0	0	31	0	0	40	0	4	7	0	0	1.38317	-2.69896	-0.558041	0.450961	2.76714	-2.86134	-0.509865	0.57283	2.61998
0	44353255	7.0433	-133920	-1.22324e+06	-39.6023	-8.61126	8.61126	-1.4423	71.6442	612.477	332.787	274.563	463.881	148.596	0	0	3	5	5	0	21	0	57	3	8	34	25	97.5815	1.71196	0	0	25	0	0	23	0	3	4	0	2	1.22639	-2.46432	-0.605509	0.629978	2.71326	-2.55557	-0.505427	0.731681	2.67319
0	44366377	8.08887	-174179	-1664124	-68.4111	-8.49552	8.49552	-1.17017	85.5242	842.557	510.289	324.013	652.045	190.512	0	0	3	5	8	0	25	0	70	3	11	42	28	123.911	1.77016	0	0	29	0	0	28	0	4	7	0	2	1.42669	-2.39108	-0.553431	0.596956	2.42695	-2.68959	-0.512631	0.685761	2.50641
0	193613	6.74956	-126479	-1017072	-116.542	-8.35151	8.35151	-0.67026	65.593	705.925	423.351	273.823	551.345	154.58	0	0	3	5	4	0	16	0	55	3	7	31	22	90.2841	1.64153	0	0	23	0	0	24	0	2	5	0	1	1.43221	-2.46501	-0.584346	0.618194	2.71326	-2.55559	-0.489125	0.722225	2.6732
0	44366018	14.4473	-265363	-2.82629e+06	-667.627	-7.94236	7.94236	-0.82807	112.618	1143.7	711.732	431.97	539.151	604.552	0	0	3	5	16	0	0	0	107	15	31	56	22	181.927	1.70025	0	0	33	0	0	51	0	7	16	0	0	3.04385	-2.66856	-0.520602	0.447967	2.74374	-2.87146	-0.515062	0.392928	2.691
0	44365981	7.60523	-140625	-1.15322e+06	-98.2775	-8.67034	8.67034	-0.85067	69.7214	735.95	413.324	316.782	584.531	151.419	0	0	3	5	6	0	22	0	56	2	8	34	24	97.5555	1.74206	0	0	24	0	0	22	0	2	6	0	2	1.3634	-2.40958	-0.59869	0.679505	2.4034	-2.44118	-0.529563	0.752208	2.49
0	53313386	5.84548	-160462	-883557	-417.712	-10.2752	10.2752	-1.67249	33.6226	497.181	131.796	365.385	117.865	379.316	0	0	2	2	3	0	5	0	31	2	5	24	17	68.8699	2.22161	0	0	9	0	9	7	0	4	1	0	1	2.79744	-2.57564	-0.167809	0.361762	2.80018	-2.80767	0.10798	0.495339	2.63368
0	2160	2.90105	-103232	-726181	-153.604	-8.9361	8.9361	-0.56874	60.1786	736.85	604.528	132.321	648.444	88.4061	0	0	3	4	4	0	6	0	56	1	5	25	19	77.1932	1.37845	0	0	20	0	0	31	0	1	4	0	0	2.19061	-2.6998	-0.545576	0.351287	2.63252	-2.65558	-0.516209	0.385755	2.78815
0	53313382	6.98426	-78398.5	-502146	13.0108	-8.82943	8.82943	-1.1333	42.2455	510.527	240.505	264.527	427.04	83.4868	0	0	2	2	3	0	15	0	32	1	4	20	15	57.6775	1.80242	0	0	14	0	0	12	0	2	2	0	2	1.63563	-2.36177	-0.54969	0.705959	2.38146	-2.41319	-0.441328	0.782838	2.46218
0	53313366	4.55259	-91428.8	-628838	-25.6155	-8.72911	8.72911	-0.73666	48.0947	563.703	338.276	220.122	482.699	81.0037	0	0	3	3	4	0	16	0	39	1	5	23	17	65.8889	1.68946	0	0	17	0	0	16	0	2	3	0	1	1.66101	-2.38198	-0.61566	0.644376	2.39489	-2.43002	-0.544271	0.733493	2.4598
0	53313360	5.66296	-97893.4	-597011	64.5525	-8.87738	8.87738	-1.05387	45.3439	592.979	277.606	315.373	476.225	116.754	0	0	2	2	3	0	20	0	34	1	4	24	12	60.7578	1.78699	0	1	17	0	0	10	0	3	3	0	0	1.21189	-2.25175	-0.642693	0.703261	2.25959	-2.27827	-0.53808	0.805915	2.39158
0	52914893	5.33416	-114316	-875218	75.8125	-8.68975	8.68975	-0.75593	60.2484	657.133	449.224	201.954	533.97	123.163	0	0	2	3	3	0	19	0	51	1	4	29	21	81.4691	1.59743	0	0	22	0	1	22	0	5	1	0	0	1.22335	-2.75186	-0.612502	0.582864	2.67662	-2.8783	-0.508653	0.770539	2.60183
0	121892	4.40606	-81958	-514824	78.7166	-9.09822	9.09822	-1.69518	38.4587	488.519	283.443	205.076	329.815	158.704	0	0	1	1	5	0	5	0	31	0	5	20	8	58.8971	1.89991	0	0	12	0	0	11	0	5	2	0	1	1.76965	-2.47826	-0.605763	0.530813	2.47591	-2.62416	-0.48694	0.617604	2.39895
0	53313364	3.40828	-97458.3	-598642	-74.7034	-9.06414	9.06414	-1.47091	36.5667	497.981	274.033	223.948	288.88	209.101	0	0	1	2	5	0	9	0	32	1	6	21	9	58.662	1.83319	0	0	12	0	0	11	0	3	6	0	0	2.15526	-2.29295	-0.52132	0.434776	2.33407	-2.35323	-0.49152	0.40051	2.44999
0	11525190	5.56141	-101988	-861494	-0.16596	-8.93499	8.93499	-0.36561	62.7606	579.282	354.319	221.617	476.96	102.322	0	0	2	3	3	0	15	0	53	1	4	27	22	79.2609	1.49549	0	0	22	0	0	26	0	2	2	0	1	1.36894	-2.7903	-0.589647	0.681597	2.69663	-2.79459	-0.499165	0.772878	2.74731
0	6918485	3.30214	-136172	-1.09951e+06	-0.92938	-8.60186	8.60186	-0.88263	72.3058	738.438	394.005	344.433	631.924	106.514	0	0	2	3	3	0	12	0	59	0	3	34	28	95.8427	1.62445	0	0	27	0	2	25	0	3	1	0	1	1.14059	-2.74176	-0.626869	0.704625	2.65734	-2.76788	-0.520818	0.805915	2.68126
0	3114	4.74934	-95448	-754829	-3.58502	-8.90327	8.90327	-0.39467	57.907	607.583	349.738	254.329	456.338	151.245	0	0	2	3	3	0	15	0	49	2	5	25	20	74.6431	1.52333	0	0	20	0	0	24	0	2	2	0	1	1.6351	-2.66255	-0.514006	0.612536	2.57535	-2.75498	-0.499868	0.706803	2.58791
0	1727	5.36533	-124888	-1.04202e+06	-76.0443	-9.1716	9.1716	0.10684	72.132	753.495	534.984	218.511	669.799	83.6955	0	0	2	3	3	0	12	0	65	1	4	31	25	95.6289	1.47121	0	0	25	0	1	34	0	3	2	0	0	1.45799	-2.7977	-0.573797	0.55588	2.72742	-2.84936	-0.467118	0.735635	2.70548
0	3696	6.58807	-119820	-864240	-147.748	-8.76033	8.76033	-0.32169	56.9692	625.959	345.28	280.679	475.002	150.957	0	0	2	3	1	0	12	0	50	1	2	27	23	79.1573	1.58315	0	0	21	0	3	23	0	2	1	0	0	1.60879	-2.54205	-0.556168	0.595551	2.66224	-2.53672	-0.467842	0.707137	2.69702
0	9930049	3.67279	-83600.7	-656650	6.93862	-8.58257	8.58257	0.18402	54.205	535.741	359.714	176.027	469.756	65.9852	0	0	2	3	1	0	12	0	47	1	2	23	19	62.588	1.33166	0	0	20	0	0	24	0	2	1	0	0	1.58158	-2.54185	-0.565941	0.60526	2.66222	-2.5366	-0.492174	0.712784	2.69695
0	16722295	2.09184	-82289.1	-625814	58.8413	-8.8339	8.8339	-0.10868	51.5379	537.005	310.921	226.084	467.264	69.7411	0	0	2	3	1	0	17	0	43	1	2	23	19	58.4523	1.35935	0	0	20	0	0	20	0	2	1	0	0	1.58244	-2.53751	-0.649273	0.606618	2.54765	-2.49439	-0.53808	0.706059	2.63758
0	71455760	3.4125	-83601.6	-619091	36.082	-7.86117	7.86117	0.12178	54.205	584.766	398.792	185.974	520.887	63.8796	0	0	2	3	1	0	12	0	47	1	2	23	19	62.588	1.33166	0	0	20	0	0	24	0	2	1	0	0	1.43209	-2.53829	-0.612125	0.659273	2.65985	-2.52492	-0.524325	0.762577	2.69282
0	3964	4.1736	-158215	-1.16342e+06	-309.662	-9.45931	9.45931	-1.18789	63.003	793.76	439.559	354.201	327.513	466.247	0	0	3	5	9	0	6	0	57	8	17	33	15	106.158	1.86242	0	0	18	0	0	24	0	4	10	0	1	2.46261	-2.57658	-0.574464	0.544211	2.61457	-2.80383	-0.538721	0.469839	2.54639
0	119570	4.26522	-120681	-848721	-245.905	-8.83281	8.83281	-0.16555	56.2682	701.063	426.123	274.94	361.287	339.776	0	0	3	5	7	0	6	0	50	7	14	27	14	88.3994	1.76799	0	0	17	0	0	23	0	3	6	0	1	2.44951	-2.5773	-0.536618	0.541416	2.6115	-2.80165	-0.517929	0.584809	2.57337
0	47811	7.559	-124264	-966949	103.501	-8.61069	8.61069	-0.7317	65.9019	723.123	405.751	312.424	504.184	218.939	0	0	3	5	4	0	21	0	53	2	6	33	23	82.1749	1.55047	0	0	26	0	0	20	0	4	3	0	0	1.16567	-2.35696	-0.641872	0.739958	2.34942	-2.46021	-0.549261	0.79691	2.46864
0	54746	11.7621	-123574	-883173	-282.96	-9.81113	9.81113	0.06742	48.3654	568.398	363.656	204.742	225.385	343.013	0	0	3	5	6	2	0	1	47	5	11	25	8	82.8525	1.76282	0	0	13	0	0	22	0	4	8	0	0	4.59057	-2.60663	-0.542855	0.447517	2.64833	-3.30691	-0.517565	0.384534	2.56911
0	57537	6.57581	-106516	-795763	30.1695	-8.48291	8.48291	-0.59682	59.7554	674.41	407.463	261.514	563.705	110.705	0	0	2	3	3	0	15	0	50	1	4	28	22	73.2885	1.46577	0	0	23	0	0	22	0	2	3	0	0	1.34747	-2.54437	-0.612717	0.665371	2.50866	-2.50006	-0.506602	0.769853	2.59016
0	2726	4.54857	-104421	-757788	47.2746	-8.68122	8.68122	-0.79499	55.3351	642.149	411.318	225.13	526.183	115.966	0	0	3	4	4	0	15	0	46	1	5	27	19	71.6248	1.55706	0	0	21	0	0	19	0	3	3	0	0	1.37427	-2.46451	-0.628468	0.698111	2.43262	-2.46175	-0.53808	0.805915	2.47444
0	71360	9.2608	-99313.1	-604636	-51.4807	-11.7423	11.7423	-5.83711	39.3487	495.004	307.325	187.679	215.275	279.729	0	0	3	4	6	0	16	1	33	6	12	22	13	50.1564	1.51989	0	0	15	0	0	11	0	0	7	0	0	1.70543	-2.19095	-0.954239	0.992254	2.33224	-2.01776	-0.892873	0.915156	2.5179
0	6005	4.07636	-110015	-664722	-109.06	-9.00448	9.00448	-1.14977	44.0565	537.266	216.816	320.449	352.722	184.544	0	0	2	2	2	0	12	0	36	1	3	24	20	61.2842	1.70234	0	0	18	0	3	12	0	1	2	0	0	1.60308	-2.35087	-0.646903	0.69892	2.36856	-2.35693	-0.53808	0.805915	2.48384
0	5095	5.56613	-108015	-796762	40.5381	-8.6469	8.6469	-0.7765	58.4287	671.438	437.488	228.19	552.941	118.497	0	0	3	4	4	0	15	0	49	1	5	28	20	75.2648	1.53602	0	0	22	0	0	21	0	3	3	0	0	1.34747	-2.54136	-0.628415	0.698111	2.50957	-2.50019	-0.53808	0.805915	2.58571
0	6918248	5.25791	-84771.2	-574439	80.8492	-8.51824	8.51824	-0.64438	46.5791	543.737	269.454	268.519	404.532	139.204	0	0	2	2	2	0	15	0	37	2	4	23	18	54.7362	1.47936	0	0	19	0	0	14	0	2	2	0	0	1.43373	-2.34647	-0.648474	0.698111	2.33604	-2.35597	-0.53808	0.805915	2.44422
0	2477	2.97375	-37785.7	-152982	-58.1904	-11.1242	11.1242	0.29934	18.8387	327.16	198.237	128.923	303.254	23.9063	1	0	0	1	2	0	0	0	19	0	2	8	5	29.0472	1.5288	0	0	5	0	0	11	0	1	2	0	0	2.53997	-2.61141	-0.11971	0.0587368	2.57244	-2.50466	0.0170902	0.123	2.70039
0	4089709	7.46735	-129870	-1.02472e+06	-380.046	-8.9637	8.9637	-0.69628	60.8783	614.216	298.579	302.005	402.416	211.8	0	0	3	5	7	0	19	0	48	7	14	30	18	80.581	1.67877	0	0	20	0	0	18	0	0	8	2	0	1.4636	-2.51326	-0.663543	0.667839	2.80714	-2.61908	-1.01465	0.721558	2.81298
0	3789162	18.553	-115408	-799766	-436.517	-7.9254	7.9254	-2.19309	58.3774	661.125	471.693	189.432	399.365	261.76	0	0	3	5	4	2	6	1	52	6	10	25	15	87.7861	1.68819	0	0	15	0	0	27	0	1	7	2	0	2.49539	-2.67576	-0.523413	0.508032	2.71586	-2.6063	-0.813081	0.423463	2.79163
0	4970052	16.3826	-115395	-840961	-423.855	-9.82855	9.82855	-2.01952	58.3774	650.162	433.702	216.46	384.182	265.98	0	0	3	5	5	2	6	1	52	7	12	25	15	87.7861	1.68819	0	0	15	0	0	27	0	1	7	2	0	2.51106	-2.69637	-0.609069	0.675345	2.80511	-2.69457	-0.739065	0.499845	2.79786
0	5309815	4.68119	-111398	-866044	-437.866	-10.0907	10.0907	0.26381	64.663	674.894	461.87	213.024	451.818	223.076	0	0	3	5	6	0	0	0	59	6	12	25	17	87.1056	1.47637	0	0	17	0	0	34	0	0	6	2	0	4.73559	-2.64463	-0.578954	0.612252	2.84001	-2.62589	-0.615548	0.629621	2.90088
0	16193234	13.6519	-106731	-691710	-368.724	-8.34872	8.34872	-1.88624	54.9082	637.688	408.668	229.02	377.839	259.85	0	0	3	5	4	2	6	1	47	6	10	24	15	80.9106	1.7215	0	0	15	0	0	23	0	1	6	2	0	2.39386	-2.64961	-0.629237	0.60917	2.7575	-2.66181	-0.764754	0.60386	2.79777
0	91898152	6.25036	-123140	-936463	-364.743	-9.06483	9.06483	-0.27361	61.4099	645.614	314.966	323.468	418.857	226.758	0	0	3	5	7	0	18	0	49	7	14	29	20	80.5922	1.64474	0	0	20	0	0	20	0	0	7	2	0	1.62561	-2.51352	-0.641847	0.674082	2.80713	-2.61908	-1.02393	0.721558	2.81297
0	4327876	4.44318	-159914	-1.32754e+06	-403.573	-9.1215	9.1215	-1.15363	76.0542	775.007	363.246	398.542	487.488	287.519	0	0	3	5	9	0	22	0	60	8	17	37	24	109.803	1.83005	0	0	24	0	0	23	0	1	9	2	1	1.33846	-2.51362	-0.665591	0.705256	2.80713	-2.61909	-0.922019	0.726404	2.81297
0	91896940	5.47616	-110625	-798536	-483.965	-9.64609	9.64609	0.46312	62.9098	690.166	489.142	201.024	472.492	217.673	0	0	3	5	7	0	0	0	59	6	13	24	15	91.4379	1.54979	0	0	15	0	0	35	0	1	6	2	0	3.76729	-2.74099	-0.534152	0.502351	2.78432	-2.75872	-0.649818	0.219664	2.83266
0	2574532	3.93125	-129810	-960627	-490.106	-9.50582	9.50582	-0.24029	70.7518	790.56	572.881	217.68	544.626	245.934	0	0	3	5	8	0	6	0	64	6	14	29	19	102.113	1.59552	0	0	19	0	0	35	0	1	7	2	0	2.15979	-2.72932	-0.58295	0.531417	2.76157	-2.5781	-0.670965	0.609345	2.8299
0	5292926	2.76344	-124459	-1061003	-411.645	-9.42572	9.42572	0.27547	74.3701	729.135	441.207	287.358	544.445	184.689	0	0	4	6	6	0	0	0	67	6	12	29	21	97.2583	1.45162	0	0	21	0	0	38	0	0	6	2	0	5.08563	-2.61877	-0.0240792	0.0420263	2.84132	-2.62754	-0.354652	0.137816	2.90241
0	2968	4.13144	-82494.5	-529311	28.9077	-8.95252	8.95252	-0.6508	46.1527	563.53	325.987	237.543	433.445	130.086	1	0	0	1	3	0	12	0	38	3	6	22	16	56.3626	1.48323	0	0	18	0	0	16	0	2	2	0	0	1.43087	-2.63012	-0.633615	0.688525	2.61568	-2.84482	-0.573587	0.731773	2.48369
0	62886	8.09783	-84807.2	-560674	-30.3693	-8.4427	8.4427	-0.66055	45.1879	535.339	299.721	230.967	388.501	146.838	0	0	1	1	3	0	12	0	37	2	5	22	17	54.3329	1.46846	0	0	18	0	0	15	0	1	3	0	0	1.62921	-2.41767	-0.648474	0.69811	2.3908	-2.44608	-0.53808	0.772061	2.46096
0	3604	9.64349	-69420.9	-406272	-58.7787	-8.3839	8.3839	-0.44859	35.0543	445.128	261.108	184.02	292.243	152.885	1	1	0	0	3	0	6	0	30	2	5	17	12	46.2404	1.54135	0	0	13	0	0	13	0	1	3	0	0	1.98581	-2.4206	-0.660873	0.710129	2.39133	-2.44661	-0.592821	0.667589	2.44803
0	44354684	6.91639	-92796.3	-693572	46.1997	-8.4655	8.4655	-0.54291	54.5195	583.925	306.737	273.833	495.268	88.6568	0	0	2	2	2	0	18	0	43	1	3	26	22	57.8006	1.3442	0	0	23	0	0	17	0	1	2	0	0	1.45114	-2.38163	-0.648297	0.69811	2.34377	-2.32843	-0.53808	0.805915	2.47116
0	441290	5.02358	-53625.3	-248337	37.2478	-9.707	9.707	-2.18641	23.4512	350.94	149.529	201.411	193.815	157.125	0	0	1	1	4	0	5	0	17	0	4	13	5	33.4869	1.96982	0	0	8	0	0	4	0	2	2	0	1	1.89202	-2.07416	-0.582168	0.659054	2.23214	-2.26368	-0.502031	0.783569	2.28255
0	2551	1.40351	-87399.5	-572873	-87.8463	-8.73547	8.73547	0.22167	50.5222	603.663	387.419	216.243	428.624	175.039	0	0	3	4	4	0	12	0	45	4	8	22	18	63.2779	1.40618	0	0	18	0	0	23	0	1	3	0	0	1.51729	-2.68238	-0.68121	0.735319	2.60332	-2.77448	-0.588297	0.810897	2.61695
0	47319	2.38128	-67999.9	-372989	-159.691	-8.72496	8.72496	0.19913	30.5763	401.185	241.974	159.211	169.316	231.869	0	0	2	3	5	0	6	0	28	5	10	15	9	45.2809	1.61718	0	0	10	0	0	13	0	1	4	0	0	2.48038	-2.57109	-0.615804	0.666111	2.60015	-2.78905	-0.625516	0.608169	2.52839
0	441289	3.45328	-86789.1	-547535	11.5585	-9.77936	9.77936	-0.49796	46.1663	581.393	383.105	198.288	439.473	141.92	0	0	1	2	4	0	12	0	40	3	7	22	14	63.8185	1.59546	0	0	16	0	0	18	0	4	2	0	0	1.46641	-2.51918	-0.62187	0.697561	2.49612	-2.75069	-0.53808	0.753285	2.44192
0	6603935	1.35559	-86559	-671743	-141.89	-8.45711	8.45711	0.39336	53.1826	523.408	396.213	127.195	417.033	106.375	0	0	2	2	3	0	6	0	48	2	5	22	19	60.4013	1.25836	0	0	19	0	0	26	0	0	3	0	0	1.56252	-2.88513	-0.536237	0.573171	2.92723	-2.80372	-0.491438	0.557209	3.00592
0	39765	8.14326	-73019.8	-454429	-70.9039	-8.40638	8.40638	-0.41258	38.1479	461.13	276.001	185.129	313.12	148.01	1	1	0	0	3	0	6	0	33	2	5	18	13	49.8038	1.50921	0	0	14	0	0	15	0	1	3	0	0	2.06342	-2.4401	-0.589218	0.613533	2.40418	-2.45055	-0.541782	0.608054	2.49213
0	24244	7.4359	-265808	-2820238	-847.817	-8.52134	8.52134	-0.77739	108.312	1063.53	728.859	334.673	580.619	482.914	0	0	3	5	19	0	12	0	101	12	31	55	31	152.432	1.50923	0	0	35	0	0	46	0	0	20	0	0	1.36168	-2.76194	-0.720903	0.766501	2.8317	-2.94388	-0.683706	0.561946	2.64143
0	5281042	9.69963	-80200.7	-517422	-78.2426	-8.38206	8.38206	-0.43574	44.3351	529.341	343.645	185.696	351.755	177.586	1	0	0	1	3	0	6	0	39	2	5	20	15	56.6652	1.45295	0	0	16	0	0	19	0	1	3	0	0	1.85647	-2.58905	-0.660463	0.709742	2.52674	-2.45996	-0.589601	0.667583	2.6701
0	5462222	6.06034	-73855.8	-433950	45.778	-9.29511	9.29511	-0.63657	36.8787	496.37	244.041	252.329	258.045	238.324	0	0	1	3	4	0	6	0	30	1	5	19	10	49.0951	1.6365	0	0	14	0	0	11	0	3	2	0	0	1.77746	-2.32007	-0.614637	0.583351	2.78434	-2.48438	-0.547392	0.605705	2.84832
0	5284512	3.85328	-123447	-792954	-149.246	-9.42832	9.42832	-0.59306	47.3365	577.69	231.471	345.254	381.711	195.979	0	0	2	3	3	0	12	0	38	1	4	26	19	72.5882	1.91021	0	0	18	1	3	12	0	2	2	0	0	2.06772	-2.34079	-0.593205	0.551067	2.48128	-2.48073	-0.450928	0.596525	2.52284
0	24507	2.71443	-110515	-727747	-118.888	-8.46711	8.46711	-1.28135	50.5401	599.213	312.268	281.99	483.222	115.991	0	0	3	4	4	0	17	0	40	3	7	26	19	70.8635	1.77159	0	0	19	0	1	14	0	1	4	0	1	1.49709	-2.29192	-0.659183	0.668016	2.28283	-2.29725	-0.566303	0.778691	2.4431
0	33887	5.4428	-114562	-788188	-68.2084	-9.26155	9.26155	-1.26318	54.2999	606.493	284.686	312.8	509.98	96.5129	0	0	2	2	3	0	22	0	43	2	5	28	24	66.6841	1.55079	0	0	23	0	2	15	0	1	2	0	0	1.40546	-2.30144	-0.646595	0.677794	2.31455	-2.19547	-0.510258	0.805915	2.45875
0	11586912	2.75441	-87229.4	-549069	4.59295	-8.79041	8.79041	-0.49343	44.5723	549.018	248.341	295.719	425.433	123.584	0	0	2	3	3	0	12	0	35	1	4	22	15	57.9323	1.65521	0	0	17	1	0	13	0	2	2	0	0	1.82887	-2.3285	-0.637839	0.585491	2.47243	-2.47822	-0.506947	0.656863	2.4465
0	5560	4.05589	-154021	-968062	-320.606	-9.31883	9.31883	-1.31972	50.1009	630.693	220.791	404.391	404.359	226.334	0	0	3	4	4	0	17	0	40	3	7	30	23	79.3376	1.98344	0	0	19	0	5	10	0	1	4	0	1	1.55039	-2.26465	-0.667294	0.656938	2.32726	-2.30026	-0.550068	0.781979	2.44196
0	71587201	1.56825	-90737.9	-605047	-47.1524	-9.03499	9.03499	-0.69102	48.7079	564.593	296.671	264.779	448.411	116.181	0	0	2	3	3	0	18	0	39	3	6	24	18	56.3339	1.44446	0	0	20	0	0	15	0	1	3	0	0	1.45392	-2.29099	-0.646847	0.692512	2.27564	-2.31048	-0.542296	0.771209	2.4079
0	439501	2.46272	-95530.5	-590935	0.399	-8.90971	8.90971	-0.46615	46.0855	572.174	236.914	333.354	441.203	130.971	0	0	2	3	3	0	12	0	35	1	4	23	16	61.0185	1.74339	0	0	17	2	0	12	0	2	2	0	0	1.80064	-2.33246	-0.634459	0.575318	2.47162	-2.47906	-0.510764	0.716149	2.45422
0	5359268	2.68757	-153774	-982013	-344.865	-9.3922	9.3922	-0.84131	51.6281	633.796	290.662	338.039	400.383	233.413	0	0	3	4	4	0	12	0	44	3	7	30	23	80.8638	1.83781	0	0	20	0	5	14	0	1	4	0	0	1.55018	-2.45439	-0.646864	0.656507	2.60456	-2.36012	-0.525118	0.745298	2.71832
0	16120562	5.77539	-85259.8	-637812	179.358	-9.00613	9.00613	-0.78231	50.2755	552.104	322.38	229.724	487.802	64.302	0	0	2	2	3	0	17	0	41	0	3	24	16	57.8525	1.41104	0	0	19	0	0	17	0	5	0	0	0	1.35956	-2.63242	-0.541646	0.632849	2.55876	-2.64669	-0.44018	0.694208	2.59271
0	17964493	2.38352	-93491.3	-622200	-32.1874	-8.71959	8.71959	-0.29559	50.0483	619.69	348.363	266.832	460.463	159.227	0	0	3	4	4	0	12	0	42	1	5	24	16	63.9532	1.52269	0	0	19	0	0	18	0	2	3	0	0	1.75153	-2.39373	-0.617781	0.535313	2.47161	-2.47907	-0.537676	0.571533	2.46037
0	16126643	2.95024	-75859.7	-518754	-70.6417	-9.42906	9.42906	0.15088	42.8599	472.919	276.74	196.179	394.738	78.1813	1	1	0	0	3	0	6	0	38	1	4	18	14	57.6797	1.51789	0	0	14	1	0	20	0	1	2	0	0	2.15942	-2.80512	-0.474035	0.487255	2.76684	-2.87119	-0.318853	0.471712	2.72922
0	45270938	2.56328	-67570.5	-466005	-81.1744	-9.26683	9.26683	0.45387	41.3467	459.57	305.039	154.531	367.339	92.2309	1	1	0	0	3	0	6	0	38	2	5	17	13	51.8796	1.36525	0	0	14	0	0	21	0	1	2	0	0	2.08351	-2.77474	-0.330309	0.363447	2.74506	-2.89239	-0.275291	0.359097	2.69288
0	5310966	4.18469	-80581	-514875	-84.0862	-9.47798	9.47798	-0.14698	41.2795	476.593	246.667	229.926	377.122	99.4703	0	0	1	1	3	0	6	0	35	2	5	18	14	57.9323	1.65521	0	0	13	2	0	17	0	1	2	0	0	2.08095	-2.77437	-0.538548	0.534592	2.74511	-2.89233	-0.32439	0.616909	2.69299
0	44348411	2.60793	-101784	-746983	-6.31087	-8.48051	8.48051	-0.18383	59.8742	678.144	497.497	180.647	571.91	106.234	0	0	3	4	5	0	11	0	54	3	8	26	18	79.7194	1.47629	0	0	20	0	0	28	0	4	2	0	0	1.2915	-2.79327	-0.558902	0.578765	2.70161	-2.79435	-0.47894	0.664279	2.75443
0	9879256	3.83363	-72280.4	-467837	-80.6345	-9.47267	9.47267	0.13702	39.7663	455.361	256.512	198.848	362.501	92.8599	1	1	0	0	3	0	6	0	35	2	5	17	13	54.3605	1.55316	0	0	13	1	0	18	0	1	2	0	0	2.08351	-2.77443	-0.517317	0.553628	2.74503	-2.89234	-0.380091	0.616799	2.6925
0	59173799	2.86372	-79467.4	-559316	-94.0912	-9.455	9.455	0.14805	45.9534	516.726	306.383	210.344	424.988	91.7382	0	0	1	2	3	0	6	0	41	2	5	19	15	60.9488	1.48656	0	0	15	1	0	22	0	1	2	0	0	2.13968	-2.79287	-0.512264	0.548986	2.76479	-2.89975	-0.370509	0.606867	2.74271
0	91930247	2.0832	-74946.8	-515267	-108.479	-9.03156	9.03156	0.28707	42.1487	475.481	346.162	129.318	366.527	108.954	0	0	1	2	4	0	6	0	39	2	6	18	13	55.8342	1.43165	0	0	14	0	0	21	0	1	3	0	0	2.06833	-2.77445	-0.488042	0.47608	2.74521	-2.89233	-0.438141	0.510488	2.69344
0	49799634	2.77853	-95388.8	-777978	-27.0925	-8.59393	8.59393	-0.29785	59.8538	605.262	358.499	234.24	514.878	90.3837	0	0	2	3	3	0	16	0	51	2	5	26	22	67.1554	1.31677	0	0	23	0	0	25	0	1	2	0	0	1.45813	-2.77459	-0.559343	0.619454	2.74501	-2.89235	-0.459248	0.69682	2.69323
0	90654473	2.14012	-142717	-1.3034e+06	-126.559	-9.02757	9.02757	-0.52011	85.3061	857.095	581.874	275.221	779.492	77.6025	0	0	3	4	4	0	12	0	75	0	4	37	28	104.16	1.3888	0	0	31	0	0	38	0	2	4	0	0	1.08412	-2.81272	-0.560243	0.607953	2.81123	-2.84043	-0.473959	0.68408	2.90027
0	46837783	2.71881	-97282.7	-883445	-31.5375	-8.73984	8.73984	0.40605	63.8546	592.66	406.255	186.405	536.536	56.1243	0	0	2	3	2	0	12	0	57	0	2	26	22	72.8527	1.27812	0	0	23	0	0	31	0	1	2	0	0	2.4385	-2.75005	-0.544111	0.599197	2.72541	-2.77707	-0.452309	0.675638	2.73122
0	854023	3.24304	-72278.5	-468970	-78.7174	-9.44311	9.44311	0.10266	39.7663	451.264	260.682	190.582	350.447	100.817	1	1	0	0	3	0	6	0	35	2	5	17	13	54.3605	1.55316	0	0	13	1	0	18	0	1	2	0	0	2.04268	-2.77452	-0.529665	0.546362	2.7449	-2.89235	-0.373205	0.616117	2.69222
0	46837647	3.05086	-79447.9	-565708	-74.6046	-9.23814	9.23814	0.14974	45.9534	484.177	269.948	214.229	390.197	93.9795	0	0	1	2	3	0	6	0	41	1	4	19	15	60.9488	1.48656	0	0	15	1	0	22	0	1	2	0	0	2.18917	-2.81749	-0.470563	0.483794	2.77603	-2.88179	-0.314345	0.466817	2.73889
0	49863118	2.62041	-74844.4	-476613	-115.962	-9.52023	9.52023	0.05755	38.1433	433.425	272.333	161.092	332.999	100.425	1	1	0	0	3	0	6	0	35	2	5	17	13	54.3605	1.55316	0	0	13	0	1	18	0	1	2	0	0	2.08351	-2.77431	-0.524009	0.54476	2.74523	-2.89238	-0.423938	0.616268	2.69153
0	46837784	1.55956	-154140	-1.43169e+06	-159.655	-9.03	9.03	-0.54021	95.9205	988.131	693.013	295.118	881.896	106.235	0	0	3	4	4	0	12	0	86	0	4	40	31	115.601	1.3442	0	0	34	0	0	46	0	2	4	0	0	1.1941	-2.81272	-0.568516	0.589746	2.743	-2.84043	-0.492504	0.682669	2.81814
0	52938427	6.35406	-128473	-946509	-321.678	-9.1212	9.1212	0.19936	67.7162	782.208	518.023	264.185	561.41	220.798	0	0	4	6	6	0	6	0	62	5	11	29	22	89.0779	1.43674	0	0	22	1	0	33	0	0	6	0	0	1.65085	-2.75122	-0.601615	0.619247	2.85624	-2.71689	-0.54259	0.628296	2.88238
0	3339	2.67092	-106596	-855175	47.3461	-8.30215	8.30215	-0.40358	63.6134	670.444	453.1	212.775	625.718	44.7262	0	0	3	4	4	0	21	0	51	0	4	29	25	77.1471	1.51269	0	0	24	0	0	22	0	2	2	0	1	1.25873	-2.59728	-0.58593	0.610266	2.56703	-2.63347	-0.491775	0.735893	2.63327
0	21302490	1.36001	-117570	-953796	8.16034	-8.26987	8.26987	-0.39307	67.509	722.026	507.228	209.973	669.776	52.2498	0	0	3	4	4	0	21	0	55	0	4	31	25	85.0844	1.54699	0	0	25	0	0	24	0	2	3	0	1	1.22378	-2.59722	-0.589136	0.587221	2.56729	-2.63345	-0.494992	0.703328	2.63383
0	192197	5.1269	-113404	-859762	-268.841	-9.89778	9.89778	-0.0042	66.7345	750.482	530.348	220.134	487.359	263.123	0	0	4	6	5	0	0	0	63	4	9	27	20	80.7342	1.2815	0	0	22	0	0	36	0	0	5	0	0	2.31283	-2.72742	-0.568968	0.569754	2.78512	-2.63864	-0.521563	0.531084	2.80826
0	439246	6.12413	-125576	-932229	-285.216	-8.2404	8.2404	0.05562	69.8142	792.211	499.776	292.435	548.257	243.954	0	0	4	6	5	0	6	0	62	5	10	29	23	92.978	1.49965	0	0	22	1	0	33	0	0	5	0	1	1.65085	-2.75186	-0.587745	0.624369	2.85587	-2.7072	-0.529263	0.671922	2.88292
0	4409	4.18656	-115904	-963500	-97.2105	-8.91554	8.91554	-0.53166	64.5582	616.027	419.818	196.21	492.533	123.495	0	0	3	4	5	0	12	0	57	3	8	29	21	83.8269	1.47065	0	0	23	0	0	28	0	2	4	0	0	1.41503	-2.78117	-0.622588	0.649131	2.73323	-2.8517	-0.537451	0.751622	2.7426
0	53323308	2.93254	-108190	-807003	-339.012	-10.6216	10.6216	1.06847	64.5481	725.875	565.229	160.646	491.389	234.487	0	0	4	6	5	0	0	0	63	5	10	25	19	79.0992	1.25554	0	0	20	0	0	38	0	0	5	0	0	2.27324	-2.76164	-0.503138	0.559243	2.85664	-2.70655	-0.531182	0.467546	2.88621
0	53319044	9.77263	-159051	-1.18689e+06	-93.9398	-8.56659	8.56659	-0.99723	66.6907	768.365	299.213	463.927	648.931	119.434	0	0	2	3	3	0	21	0	51	1	4	35	27	101.255	1.98538	0	0	24	2	2	16	0	2	4	0	1	1.32162	-2.31552	-0.663323	0.68059	2.43809	-2.55595	-0.472784	0.846129	2.48249
0	53322578	4.50443	-123439	-812831	-160.142	-9.33755	9.33755	-0.67154	52.3839	637.704	323.77	313.934	497.469	140.234	0	0	2	3	3	0	18	0	43	3	6	28	21	72.4874	1.68575	0	0	21	0	2	15	0	1	4	0	0	1.46179	-2.39732	-0.636381	0.699803	2.35667	-2.47603	-0.53808	0.805915	2.43005
0	53320696	3.48912	-125959	-866341	-113.875	-9.45269	9.45269	-0.751	55.7737	681.576	338.094	343.482	522.615	158.96	0	0	3	4	4	0	18	0	45	3	7	29	20	80.8947	1.79766	0	0	21	1	1	16	0	2	4	0	0	1.5154	-2.5065	-0.639748	0.677217	2.4643	-2.53285	-0.53808	0.807803	2.55845
0	53321636	1.48808	-95625.9	-737164	80.7568	-8.27123	8.27123	-0.3698	59.7179	629.867	393.654	231.561	591.321	38.5459	0	0	2	3	3	0	21	0	47	0	3	27	24	68.5852	1.45926	0	0	23	0	0	20	0	2	1	0	1	1.20025	-2.59741	-0.576075	0.634127	2.564	-2.63349	-0.48369	0.741114	2.62182
0	53325945	3.2132	-113403	-936093	-200.491	-9.82395	9.82395	0.66388	66.7345	650.275	457.38	192.895	391.264	259.011	0	0	4	6	5	0	0	0	63	4	9	27	20	80.7342	1.2815	0	0	22	0	0	36	0	0	5	0	0	2.47973	-2.66479	-0.523865	0.560421	2.83083	-2.64774	-0.472067	0.513948	2.80462
0	53320664	1.6556	-106882	-769702	-290.754	-10.0928	10.0928	0.63122	61.881	719.615	532.793	186.822	475.483	244.132	0	0	4	6	5	0	0	0	59	4	9	25	18	76.054	1.28905	0	0	20	0	0	34	0	0	5	0	0	2.27498	-2.69696	-0.542479	0.52484	2.78658	-2.61836	-0.527396	0.463124	2.82135
0	66524795	1.09331	-41054	-210592	-29.9773	-9.36555	9.36555	2.91899	28.2891	408.9	363.899	45.0014	256.127	152.773	1	0	0	1	3	0	0	0	29	3	6	10	7	35.7645	1.23326	0	0	7	0	0	19	0	3	0	0	0	2.6476	-2.67362	-0.403336	0.472749	2.58739	-2.78904	-0.369723	0.517097	2.59837
0	53318044	6.98579	-157881	-1.04701e+06	-338.033	-9.71561	9.71561	-1.25278	52.0499	638.71	257.722	380.988	376.277	262.433	0	0	2	3	2	0	12	0	45	1	3	30	24	81.8268	1.81837	0	0	20	0	6	15	0	1	3	0	0	1.9237	-2.41443	-0.546323	0.596088	2.45846	-2.5176	-0.455957	0.638405	2.51808
0	53316752	4.36457	-95475.9	-600386	-235.015	-10.8906	10.8906	-0.26974	41.6291	509.697	300.803	208.894	325.636	184.061	0	0	2	4	6	0	0	0	38	1	7	19	9	73.8168	1.94255	0	0	9	1	0	19	0	3	5	1	0	4.5657	-2.58616	-0.206105	0.0497866	2.66465	-2.7123	-0.243275	0.360349	2.73371
0	117890187	3.28395	-120232	-980078	59.9593	-7.93615	7.93615	-0.47307	65.4074	733.877	591.552	142.325	478.96	254.917	0	0	3	4	6	0	15	0	57	2	8	30	16	96.0027	1.68426	0	0	20	0	0	27	0	7	2	0	1	1.43708	-2.66064	-0.500961	0.482045	2.5762	-2.75092	-0.438877	0.56939	2.60543
0	11326407	1.7707	-94603.8	-628621	113.757	-8.28282	8.28282	-0.74129	49.1619	604.331	333.659	270.672	432.738	171.593	0	0	2	3	3	0	15	0	38	1	4	23	14	68.6049	1.80539	0	0	15	2	0	15	0	5	0	0	1	1.66122	-2.58117	-0.651156	0.635436	2.53301	-2.4282	-0.362098	0.897564	2.69141
0	6323490	1.52538	-96395.8	-639843	164.065	-8.3217	8.3217	-0.78863	50.4583	634.385	298.289	336.096	469.623	164.762	0	0	2	3	3	0	15	0	37	1	4	24	15	69.0344	1.8658	0	1	16	1	0	13	0	5	0	0	1	1.64605	-2.50437	-0.67503	0.673089	2.48989	-2.37966	-0.373963	0.960056	2.6248
0	117890250	3.45271	-98681.5	-654834	-79.451	-8.89258	8.89258	-0.26586	41.5967	524.817	393.353	131.464	233.107	291.709	0	0	3	5	7	0	9	0	38	4	11	22	6	68.8919	1.81295	0	0	12	0	0	16	0	6	4	0	0	1.70036	-2.50681	-0.570112	0.677412	2.76622	-2.73513	-0.638805	0.505601	2.61684
0	11302159	5.85904	-98389.2	-663384	140.167	-7.75347	7.75347	-0.93615	48.2615	567.24	286.587	280.653	354.302	212.937	0	0	3	4	4	0	15	0	36	1	5	24	13	66.9846	1.86068	0	0	15	2	0	12	0	6	0	0	1	1.54774	-2.50413	-0.612492	0.608611	2.49887	-2.40435	-0.434274	0.814746	2.62093
0	10096043	1.64418	-93273.8	-602426	160.105	-8.28058	8.28058	-0.85623	46.4947	587.429	282.136	305.293	423.809	163.62	0	0	2	3	3	0	15	0	34	1	4	23	14	62.707	1.84432	0	0	15	2	0	11	0	5	0	0	1	1.66364	-2.39561	-0.66067	0.689201	2.40142	-2.32622	-0.469894	0.866247	2.52323
0	117890368	2.60718	-96862.3	-663012	158.382	-8.24076	8.24076	-0.89043	49.5883	592.165	286.854	305.311	413.336	178.828	0	0	2	3	3	0	15	0	37	1	4	24	15	67.0344	1.81174	0	0	16	2	0	13	0	5	0	0	1	1.7189	-2.51621	-0.660358	0.689151	2.51073	-2.39959	-0.464604	0.862405	2.63934
0	159738	4.20314	-78271.6	-510143	-38.5755	-9.26299	9.26299	-1.08769	40.3343	464.791	243.607	221.184	366.295	98.4961	1	1	0	0	3	0	12	0	33	1	4	20	14	49.6044	1.50316	0	0	16	0	0	13	0	1	3	0	0	1.86431	-2.36803	-0.569005	0.64495	2.4354	-2.34554	-0.461905	0.717952	2.4967
0	449015	3.00329	-101165	-676955	-124.37	-9.14908	9.14908	-0.53633	43.0319	510.875	294.951	215.924	365.065	145.81	0	0	2	3	5	0	6	0	37	2	7	22	12	67.2338	1.81713	0	0	14	1	0	15	0	2	5	0	0	1.87731	-2.53865	-0.574752	0.554626	2.67957	-2.6222	-0.476701	0.699081	2.69094
0	10238071	1.45882	-88068.3	-588200	-80.0557	-9.45462	9.45462	0.35221	47.4422	581.029	363.414	217.615	373.375	207.653	0	0	1	3	3	0	6	0	44	4	7	21	13	68.0599	1.54682	0	0	15	0	0	23	0	3	3	0	0	2.23731	-2.66601	-0.541635	0.617449	2.64971	-2.80142	-0.491883	0.675341	2.69006
0	46937091	5.35364	-84818.3	-619887	-102.445	-9.61689	9.61689	0.17983	52.6902	577.362	326.95	250.412	435.003	142.359	0	0	3	5	4	0	12	0	45	4	8	22	17	69.6046	1.54677	0	0	17	0	0	23	0	2	2	1	0	1.75963	-2.66936	-0.607645	0.697303	2.72899	-2.80912	-0.566991	0.714407	2.77641
0	6049	3.45155	-62915.4	-343474	0.02302	-8.41022	8.41022	-0.60836	34.0587	438.659	214.505	213.918	286.058	152.601	1	1	0	0	2	0	10	0	27	2	4	16	12	45.3087	1.6781	0	0	12	0	0	11	0	1	2	0	1	1.73502	-2.29466	-0.604776	0.659053	2.32999	-2.49849	-0.526328	0.754044	2.43377
0	10173385	1.84257	-110368	-764848	-203.329	-10.1356	10.1356	-0.21455	48.8062	567.493	333.539	233.954	250.49	317.004	0	0	3	5	6	0	0	0	46	4	10	23	9	82.3266	1.78971	0	0	13	1	0	23	0	4	5	0	0	4.14524	-2.67871	-0.503134	0.482533	2.69245	-2.85283	-0.490441	0.39404	2.68868
0	21145345	5.23152	-67127.3	-433296	-219.904	-10.334	10.334	1.38316	40.739	484.673	338.548	146.126	273.913	210.761	0	0	2	4	4	0	0	0	39	4	8	15	10	58.1174	1.49019	0	0	10	0	0	24	0	1	3	1	0	4.23049	-2.71411	-0.472432	0.475798	2.76178	-2.76879	-0.540628	0.366986	2.83981
0	8759	3.56614	-76178.9	-486018	-158.375	-9.76771	9.76771	0.1197	42.0251	514.955	305.69	209.265	327.711	187.244	0	0	2	4	4	0	6	0	37	4	8	18	11	62.2647	1.68283	0	0	12	0	0	19	0	2	3	1	0	2.40859	-2.64367	-0.519097	0.583941	2.71185	-2.7656	-0.513446	0.662822	2.74071
0	21704	3.43833	-89183.5	-562234	-71.7935	-9.1086	9.1086	-0.04498	42.7683	534.992	281.686	253.306	351.081	183.911	0	0	1	3	3	0	6	0	38	4	7	20	12	66.7471	1.7565	0	0	13	1	0	18	0	3	3	0	0	2.4598	-2.66346	-0.557609	0.620517	2.64827	-2.76991	-0.448115	0.707229	2.69014
0	449013	4.75563	-83525.9	-582771	-142.712	-9.6178	9.6178	0.12457	48.6319	543.509	300.141	243.368	411.328	132.181	0	0	3	5	4	0	12	0	41	4	8	21	16	64.4662	1.57235	0	0	16	0	0	20	0	1	3	1	0	1.82255	-2.62488	-0.620997	0.697329	2.7151	-2.75788	-0.615413	0.709524	2.75627
0	448903	3.28808	-84475.7	-561841	-74.8294	-8.78395	8.78395	0.19854	44.3487	538.084	336.944	201.14	359.645	178.439	0	0	1	3	3	0	6	0	41	4	7	20	12	64.6082	1.57581	0	0	14	0	0	21	0	3	3	0	0	2.38977	-2.66352	-0.539504	0.574978	2.64824	-2.76998	-0.492789	0.678917	2.69013
0	5289205	5.50354	-95450.2	-653666	-113.407	-9.34101	9.34101	0.03902	48.2442	594.735	404.333	190.402	396.64	198.095	0	0	3	5	4	0	6	0	45	4	8	22	13	71.7332	1.59407	0	0	15	0	0	23	0	3	4	0	0	2.40505	-2.66485	-0.529041	0.59212	2.64909	-2.78333	-0.457727	0.669899	2.69014
0	44412241	4.52513	-116384	-979002	-78.6495	-9.63598	9.63598	0.05751	66.8634	719.157	483.312	235.844	547.284	171.873	0	0	2	4	5	0	6	0	61	2	7	29	19	90.9126	1.49037	0	0	22	0	0	32	0	4	3	0	0	2.02625	-2.70347	-0.515504	0.578432	2.74762	-2.89329	-0.44637	0.641012	2.71378
0	6253	5.1296	-87121.5	-627301	-152.12	-9.63411	9.63411	0.19011	51.7254	570.086	318.942	251.144	422.595	147.491	0	0	3	5	4	0	12	0	44	4	8	22	17	67.8657	1.5424	0	0	17	0	0	22	0	1	3	1	0	1.75963	-2.64488	-0.620111	0.696563	2.72893	-2.75799	-0.592228	0.709214	2.78142
0	468953	1.76468	-122872	-897493	-59.2481	-8.99602	8.99602	-2.42905	55.6635	561.704	261.457	300.247	422.327	139.378	0	0	2	3	2	0	12	0	44	0	2	27	22	74.2896	1.6884	0	0	20	0	4	17	0	1	0	0	2	1.99546	-2.57832	-0.60465	0.550904	2.5313	-2.43687	-0.357799	0.827437	2.69206
0	91935546	3.52453	-116384	-1.02681e+06	-83.4426	-9.57792	9.57792	0.18117	66.8634	668.844	430.136	238.708	501.223	167.621	0	0	2	4	5	0	6	0	61	2	7	29	19	90.9126	1.49037	0	0	22	0	0	32	0	4	3	0	0	2.02625	-2.70347	-0.515504	0.578432	2.74762	-2.89329	-0.44637	0.641012	2.71378
0	15993	4.88446	-129861	-1019266	25.2503	-8.26539	8.26539	-0.01593	68.5826	780.155	491.985	282.709	514.268	265.888	0	0	4	6	4	0	20	0	59	4	8	33	21	94.5607	1.60272	0	0	24	0	0	26	0	6	3	0	0	1.19839	-2.60753	-0.644765	0.703235	2.59576	-2.55173	-0.571156	0.764802	2.68691
0	5287834	5.71031	-94307.2	-631351	168.178	-8.23517	8.23517	-0.61997	51.6619	638.682	365.728	272.954	384.556	254.126	0	0	4	6	4	0	19	0	40	5	9	25	15	68.6223	1.71556	0	0	16	0	0	15	0	7	0	0	2	1.16632	-2.35497	-0.669701	0.661365	2.32335	-2.64422	-0.573051	0.769912	2.48984
0	8546	1.8997	-87051.7	-541579	-88.9257	-8.86784	8.86784	-0.23605	34.9763	450.586	338.032	112.553	145.051	305.535	0	0	2	3	7	0	9	0	32	4	11	19	5	59.0654	1.84579	0	0	10	0	0	13	0	5	4	0	0	1.73357	-2.51089	-0.686715	0.757092	2.76997	-2.71034	-0.713186	0.567167	2.63703
0	5994	3.76843	-79813.3	-649299	-115.407	-10.0216	10.0216	-0.01	53.7142	486.795	334.973	151.822	373.411	113.384	0	0	1	1	2	0	0	0	49	1	3	21	18	57.8042	1.17968	0	0	19	0	0	28	0	0	2	0	0	1.6248	-2.94467	-0.503049	0.430079	2.9549	-2.86332	-0.435167	0.495704	3.03348
0	2800	4.03372	-74675.5	-441015	-102.928	-9.15983	9.15983	-0.1738	35.8495	454.17	267.715	186.454	357.782	96.388	0	0	1	1	4	0	12	0	30	2	6	18	13	42.8842	1.42947	0	0	14	0	0	12	0	0	4	0	0	1.94959	-2.26419	-0.637472	0.662597	2.27394	-2.24776	-0.573726	0.741578	2.41936
0	2733526	1.70003	-81852.8	-715772	12.7658	-9.2506	9.2506	1.2005	59.5258	538.263	350.289	187.974	455.191	83.0725	0	0	2	2	1	0	0	0	53	1	2	23	22	58.2656	1.09935	0	0	22	0	0	30	0	0	1	0	0	1.68192	-2.90914	-0.526133	0.579662	2.94553	-2.83283	-0.526928	0.568469	3.01197
0	5756	1.94699	-70242	-418439	-61.4991	-9.26125	9.26125	-0.46048	36.8075	450.823	247.158	203.664	355.547	95.2756	0	0	1	1	3	0	12	0	30	1	4	18	14	40.8289	1.36096	0	0	15	0	0	12	0	0	3	0	0	1.61359	-2.4932	-0.666683	0.708425	2.54018	-2.43068	-0.564887	0.796845	2.62402
0	6231	2.31099	-73612	-492942	-20.1495	-8.52951	8.52951	0.16315	45.2863	512.553	308.735	203.818	403.577	108.976	0	0	1	1	2	0	12	0	38	2	4	20	18	47.3039	1.24484	0	0	18	0	0	18	0	0	2	0	0	1.97051	-2.34589	-0.642184	0.703693	2.29373	-2.14446	-0.53808	0.805915	2.50272
0	13109	2.59855	-94383	-807959	-162.503	-9.41082	9.41082	0.29983	60.7034	542.756	377.91	164.846	387.023	155.733	0	0	2	2	3	0	0	0	56	3	6	24	20	68.2183	1.21818	0	0	21	0	0	32	0	0	3	0	0	1.63568	-2.97804	-0.442261	0.501854	2.98242	-2.90266	-0.422026	0.519454	3.05639
0	6540055	2.67544	-70894.4	-426438	-78.9439	-8.84136	8.84136	0.20273	38.1411	453.192	277.013	176.179	348.183	105.009	1	1	0	0	3	0	12	0	32	2	5	18	15	43.3388	1.35434	0	0	15	0	0	14	0	0	3	0	0	1.54738	-2.59795	-0.683038	0.729959	2.58561	-2.57469	-0.589053	0.803484	2.64941
0	11514074	3.26279	-84357.4	-672085	-5.1911	-8.73512	8.73512	-0.75522	54.567	530.784	335.823	194.961	427.149	103.635	0	0	2	2	2	0	0	0	47	1	3	23	20	56.7879	1.20825	0	0	21	0	0	24	0	0	2	0	0	1.60526	-2.78643	-0.553846	0.577735	2.8848	-2.72114	-0.510904	0.590916	2.94114
0	6539771	1.82337	-80469.5	-665851	-141.731	-10.2553	10.2553	0.90132	55.0478	488.991	356.28	132.712	378.632	110.36	0	0	1	1	2	0	0	0	51	1	3	21	18	59.3764	1.16424	0	0	19	0	0	30	0	0	2	0	0	1.62365	-2.98389	-0.518388	0.448523	2.97632	-2.90529	-0.450374	0.426863	3.05448
0	6540042	1.43087	-92857.7	-802255	-72.221	-9.28224	9.28224	-0.48754	63.4214	558.565	361.294	197.271	441.033	117.532	0	0	2	2	2	0	0	0	57	0	2	25	21	66.4328	1.16549	0	0	23	0	0	32	0	0	2	0	0	1.67324	-2.91419	-0.372358	0.270501	2.9544	-2.83632	-0.286848	0.288784	3.03461
0	6539760	1.65952	-94392.8	-801777	-172.237	-10.246	10.246	0.91384	60.7034	559.615	391.032	168.583	452.37	107.245	0	0	2	2	2	0	0	0	56	0	2	24	19	68.2183	1.21818	0	0	21	0	0	32	0	0	3	0	0	1.56341	-2.98373	-0.401343	0.285611	2.97812	-2.905	-0.304285	0.296114	3.05549
0	6540047	1.61327	-74938.4	-551328	-86.8903	-8.9143	8.9143	0.31552	47.9534	478.621	317.636	160.985	377.624	100.998	0	0	1	1	2	0	6	0	42	1	3	20	17	51.3112	1.22169	0	0	18	0	0	22	0	0	2	0	0	1.56914	-2.87001	-0.575001	0.558068	2.90556	-2.78374	-0.483619	0.60342	2.98217
0	6539784	3.70041	-83399.5	-704398	-114.638	-9.98357	9.98357	0.0311	56.8078	504.972	352.051	152.921	382.749	122.223	0	0	2	2	2	0	0	0	52	1	3	22	19	60.7776	1.1688	0	0	20	0	0	30	0	0	2	0	0	1.63755	-2.94742	-0.357423	0.370108	2.96671	-2.8694	-0.333268	0.346705	3.0415
0	6539766	2.10598	-103615	-742352	-172.334	-8.68972	8.68972	0.19984	55.213	617.754	473.642	144.113	507.112	110.642	0	0	3	4	5	0	12	0	49	2	7	25	20	67.0335	1.36803	0	0	20	0	0	24	0	0	5	0	0	1.49392	-2.64273	-0.652851	0.630024	2.75233	-2.64912	-0.574367	0.734777	2.74092
0	6540046	0.581953	-151475	-1.25702e+06	-33.0072	-8.52014	8.52014	-0.56153	76.3982	813.204	500.866	312.338	718.832	94.3716	0	0	3	4	5	0	17	0	64	0	5	36	25	109.183	1.70598	0	0	26	2	0	28	0	4	4	0	0	1.08904	-2.72419	-0.639962	0.687429	2.69813	-2.85882	-0.480855	0.805915	2.6992
0	6539762	4.53501	-93008.7	-655493	-64.4828	-9.17987	9.17987	-0.63779	47.7431	521.419	273.371	248.048	369.656	151.763	0	0	2	2	3	0	18	0	38	2	5	24	19	51.6797	1.35999	0	0	20	0	0	14	0	0	4	0	0	1.64768	-2.39084	-0.683433	0.766427	2.51644	-2.25361	-0.585707	0.805915	2.61791
0	6539812	4.84105	-101648	-849320	-188.365	-10.0502	10.0502	-0.06121	57.5	513.94	352.629	161.311	368.292	145.647	0	0	2	2	3	0	0	0	53	2	5	24	20	71.5049	1.34915	0	0	20	0	1	29	0	0	3	0	0	1.76117	-2.91964	-0.470045	0.396711	2.99448	-2.93123	-0.428285	0.44135	3.01263
0	11616637	3.38617	-82077	-655706	-51.9076	-10.0234	10.0234	-0.03848	54.1406	516.298	326.477	189.821	419.778	96.5204	0	0	1	1	2	0	0	0	48	1	3	22	19	57.4282	1.19642	0	0	20	0	0	26	0	0	2	0	0	1.58025	-2.92767	-0.552026	0.517864	2.95443	-2.85177	-0.517195	0.500085	3.02323
0	6539814	2.21927	-106398	-894002	43.5042	-8.91608	8.91608	-0.0255	68.5122	680.817	463.972	216.845	622.094	58.7232	0	0	2	3	2	0	18	0	57	0	2	29	27	75.6574	1.32732	0	0	26	1	0	28	0	1	1	0	0	1.63592	-2.59508	-0.593524	0.642353	2.4975	-2.70398	-0.491214	0.752782	2.54754
0	11550235	0.90279	-86458.6	-623672	-151.092	-8.87025	8.87025	0.36054	49.1772	488.261	328.087	160.174	349.768	138.493	0	0	1	1	2	0	6	0	44	2	4	21	19	59.1144	1.34351	0	0	18	0	1	23	0	0	2	0	0	1.57809	-2.88306	-0.582635	0.625815	2.94113	-2.80477	-0.547957	0.60571	2.99246
0	91935555	1.59539	-113359	-758145	22.7829	-8.5188	8.5188	-1.41147	52.1395	624.248	249.003	375.245	426.016	198.231	0	0	2	2	4	0	6	0	39	1	5	27	15	75.2976	1.93071	0	1	18	0	0	12	0	3	4	0	1	1.29891	-2.30786	-0.619652	0.635622	2.62925	-2.40716	-0.538455	0.799799	2.54251
0	60201926	3.03125	-96665	-716075	-117.335	-9.42577	9.42577	-0.18477	61.1298	668.861	449.292	219.569	473.424	195.437	0	0	2	3	3	0	6	0	55	3	6	25	21	67.9057	1.23465	0	0	22	0	0	30	0	0	3	0	0	1.91381	-2.68678	-0.590304	0.646025	2.62272	-2.52832	-0.492034	0.739235	2.78536
0	42609873	6.53079	-175802	-2.09771e+06	-10.5898	-8.76533	8.76533	-0.25156	108.125	886.886	580.164	306.721	685.667	201.218	0	0	3	4	6	0	6	0	97	1	7	45	36	122.128	1.25905	0	0	39	0	0	52	0	0	6	0	0	1.88078	-2.8813	-0.334869	0.159538	2.91977	-2.87573	-0.240179	0.183872	2.93361
0	118735302	6.96203	-95177	-609435	-85.2825	-9.36136	9.36136	-1.14649	44.4119	565.261	309.513	255.748	438.233	127.028	0	0	2	3	5	0	6	0	37	0	5	22	13	63.9334	1.72793	0	0	15	0	0	15	0	1	5	0	1	1.80438	-2.35501	-0.552661	0.453365	2.38431	-2.32429	-0.512489	0.571641	2.44027
0	118735305	5.12405	-67333.3	-448542	259.818	-12.7533	12.7533	-4.97681	41.9351	492.942	345.324	147.618	411.436	81.5057	0	0	1	1	1	0	17	2	33	0	1	19	13	49.8038	1.50921	0	0	15	0	0	14	0	3	0	0	1	1.67773	-2.22814	-0.643672	0.700667	2.32013	-2.38078	-0.53808	0.805915	2.35671
0	992586	5.1195	-126312	-898104	-206.513	-8.40471	8.40471	-1.55934	55.9559	639.037	288.855	340.234	331.282	307.755	0	0	4	6	7	0	16	0	44	6	13	29	18	79.2495	1.80113	0	0	19	0	0	15	0	1	7	0	2	1.6639	-2.38362	-0.612502	0.685321	2.39615	-2.42944	-0.526727	0.769401	2.51424
0	817940	8.35938	-107892	-717462	63.4282	-9.59228	9.59228	-1.70778	48.2359	578.252	222.071	322.246	361.17	217.082	0	0	2	4	7	0	17	0	36	2	9	26	15	70.898	1.96939	0	0	16	0	0	10	0	4	4	0	2	1.37408	-2.2763	-0.643506	0.68813	2.45644	-2.21802	-0.550573	0.738107	2.53583
0	121376807	3.9038	-126603	-1.02642e+06	-72.8146	-9.15574	9.15574	-1.24096	63.5459	643.164	365.06	278.104	489.249	153.915	0	0	3	5	5	0	18	0	52	2	7	32	22	80.2783	1.54381	0	0	25	0	0	20	0	2	5	0	0	1.48521	-2.49619	-0.649091	0.697564	2.52713	-2.60963	-0.53808	0.805915	2.50188
0	16203606	1.06977	-110210	-836544	-163.707	-9.11457	9.11457	-1.33095	55.653	609.591	403.249	206.342	399.929	209.662	0	0	2	4	5	0	6	0	50	2	7	26	16	77.8334	1.55667	0	0	19	0	0	24	0	2	5	0	0	2.15973	-2.66127	-0.498515	0.58169	2.63999	-2.7497	-0.427137	0.579392	2.63558
0	121271792	5.37746	-108659	-700211	282.107	-9.59523	9.59523	-2.71215	42.0668	529.123	161.088	335.046	328.4	200.723	0	0	2	3	5	0	20	0	31	0	5	25	15	65.5582	2.11478	0	0	13	1	0	6	0	7	3	0	1	1.46069	-2.18466	-0.644686	0.69592	2.28811	-2.07764	-0.53808	0.79728	2.43195
0	115260	5.66461	-92476.3	-597728	77.12	-9.44255	9.44255	-1.75885	43.9071	523.072	240.126	282.946	368.533	154.539	0	0	3	3	5	0	17	0	32	0	5	23	14	61.3575	1.91742	0	0	15	0	0	9	0	3	3	0	2	1.3392	-2.27625	-0.629419	0.713665	2.45669	-2.21795	-0.543149	0.785036	2.53652
0	118724278	5.23321	-99448.4	-711799	81.0153	-8.91907	8.91907	-0.77527	53.0127	610.628	326.015	284.613	479.149	131.48	0	0	2	3	4	0	17	0	42	0	4	26	16	71.7667	1.70873	0	0	19	0	0	16	0	4	2	0	1	1.3582	-2.31802	-0.644569	0.67281	2.62674	-2.39945	-0.53808	0.754939	2.5531
0	118724277	8.41837	-120164	-951620	73.3444	-8.04941	8.04941	-1.26253	61.9947	648.969	305.886	323.506	474.702	174.267	0	0	4	6	6	0	25	0	47	4	10	31	21	84.2033	1.79156	0	0	22	0	0	16	0	4	3	0	2	1.27244	-2.3802	-0.657799	0.73023	2.38857	-2.42657	-0.563198	0.80923	2.50686
0	118724284	2.5723	-119211	-965587	-30.8028	-9.27328	9.27328	-1.20438	62.7439	627.056	365.868	261.188	497.974	129.081	0	0	3	4	4	0	18	0	51	1	5	31	22	76.7587	1.50507	0	0	25	0	0	20	0	2	4	0	0	1.47511	-2.49622	-0.649091	0.699577	2.52702	-2.60964	-0.53808	0.805915	2.50035
0	118724269	3.07785	-98646.4	-709932	-209.289	-9.42421	9.42421	-0.17956	65.1305	758.25	553.799	204.451	617.356	140.894	0	0	2	3	3	0	6	0	61	3	6	25	21	72.7953	1.19337	0	0	22	0	0	36	0	0	3	0	0	1.91289	-2.7428	-0.588695	0.646024	2.67166	-2.57037	-0.492034	0.724487	2.84484
0	118724263	3.23344	-108543	-887302	-24.0198	-8.55865	8.55865	-0.567	61.8094	633.428	428.052	205.376	472.885	160.543	0	0	3	4	4	0	11	0	54	0	4	27	19	86.4336	1.60062	0	0	20	0	0	27	0	3	3	0	1	1.65064	-2.67891	-0.299286	0.388329	2.62579	-2.68813	-0.368157	0.406236	2.65892
0	2802825	3.16244	-206442	-2.13031e+06	-331.447	-9.0563	9.0563	-0.58085	93.9662	814.667	452.133	362.534	558.754	255.913	0	0	3	5	9	0	18	0	81	8	17	48	29	131.28	1.62075	0	0	34	0	0	33	0	3	11	0	0	1.41401	-2.58291	-0.645185	0.702864	2.61522	-2.84079	-0.565452	0.785804	2.47367
0	3743088	0.950066	-55956.2	-313316	-106.176	-8.78817	8.78817	0.37559	34.7263	446.547	314.045	132.502	334.06	112.487	0	0	1	2	2	0	6	0	32	2	4	14	12	39.9218	1.24756	0	0	12	0	0	18	0	0	2	0	0	2.12403	-2.66016	-0.589556	0.65331	2.59598	-2.50543	-0.497516	0.680025	2.75543
0	3244129	0.811664	-56947.4	-309396	-29.8116	-8.61887	8.61887	0.26493	32.4855	424.672	245.236	179.436	369.659	55.0131	0	0	1	1	2	0	12	0	27	1	3	15	13	35.2567	1.3058	0	0	13	0	0	12	0	0	2	0	0	1.61365	-2.33348	-0.641349	0.701086	2.29265	-2.19759	-0.53808	0.805915	2.45875
0	91896566	3.2484	-61282.1	-295452	-234.743	-11.4737	11.4737	0.97805	29.7167	433.296	297.888	135.408	233.092	200.204	0	0	2	3	4	0	0	0	29	4	8	13	7	40.3521	1.39145	0	0	9	0	0	16	0	0	4	0	0	2.92342	-2.67243	-0.515873	0.447413	2.63612	-2.53245	-0.476625	0.393228	2.78162
0	2374619	6.42854	-213601	-2.22985e+06	-167.95	-8.46837	8.46837	-0.56993	102.936	1013.8	541.822	463.961	689.049	324.754	0	0	4	6	7	0	24	0	87	8	15	52	33	141.451	1.62587	0	0	38	0	0	35	0	5	9	0	0	1.12785	-2.57824	-0.609162	0.639586	2.61725	-2.84029	-0.565315	0.712707	2.48018
0	2538553	1.67787	-141388	-992904	-321.669	-9.55895	9.55895	-0.68457	56.5627	704.373	395.303	309.07	381.185	323.188	0	0	2	4	6	0	0	0	51	3	9	30	15	83.1251	1.6299	0	0	19	0	0	21	0	1	10	0	0	1.7616	-2.65981	-0.525002	0.563278	2.65024	-2.73309	-0.481022	0.601638	2.69113
0	3166385	1.45626	-93070.4	-544715	-213.089	-9.12532	9.12532	-0.5733	40.5471	530.995	318.232	212.763	309.528	221.466	0	0	2	4	5	0	12	0	35	4	9	21	14	52.1088	1.48882	0	0	15	0	0	14	0	0	6	0	0	1.66713	-2.43314	-0.775624	0.813759	2.43071	-2.46425	-0.704194	0.826418	2.46603
0	5686694	6.16793	-191077	-1.68847e+06	-603.232	-8.88821	8.88821	0.05304	79.659	827.692	552.307	275.385	433.787	393.905	0	0	3	5	14	0	12	0	74	10	24	40	24	111.011	1.50015	0	0	26	0	0	34	0	0	14	0	0	1.28208	-2.75169	-0.728131	0.771188	2.82226	-2.94514	-0.790283	0.575705	2.61897
0	15945370	1.89881	-114030	-793243	-368.744	-8.97148	8.97148	0.30674	50.579	593.042	397.371	195.671	327.718	265.324	0	0	3	5	8	0	6	0	48	6	14	24	15	70.0391	1.45915	0	0	16	0	0	24	0	0	8	0	0	1.79756	-2.72764	-0.730339	0.774975	2.78824	-2.91083	-0.725119	0.567992	2.64573
0	5142274	3.27091	-106565	-799660	-166.245	-8.60868	8.60868	0.13778	56.973	620.067	424.693	195.375	495.74	124.327	0	0	3	4	5	0	12	0	50	3	8	26	21	68.3054	1.36611	0	0	21	0	0	24	0	0	5	0	0	1.68155	-2.59769	-0.507718	0.564215	2.59913	-2.57396	-0.439679	0.605234	2.67835
0	5238107	3.282	-87193	-680717	1.29873	-8.89384	8.89384	-0.51731	57.2986	590.326	414.936	164.327	560.515	29.8108	0	0	2	3	2	0	10	0	50	0	2	24	20	65.7427	1.31485	0	0	21	0	0	26	0	2	1	0	0	1.25955	-2.84745	-0.634377	0.681153	2.765	-2.88216	-0.545373	0.743663	2.77459
0	118708926	1.80502	-56162.9	-293764	-137.397	-8.93686	8.93686	0.27374	29.3411	392.813	253.45	139.363	238.426	154.387	1	1	0	0	3	0	6	0	27	3	6	13	10	37.1048	1.37425	0	0	10	0	0	14	0	0	3	0	0	2.27432	-2.58745	-0.58889	0.676605	2.56252	-2.57219	-0.606397	0.598411	2.61172
0	118708930	1.96079	-56160.8	-295303	-135.351	-8.90785	8.90785	0.28865	29.3411	385.832	257.454	128.378	237.157	148.675	1	1	0	0	3	0	6	0	27	3	6	13	10	37.1048	1.37425	0	0	10	0	0	14	0	0	3	0	0	2.27432	-2.58745	-0.58889	0.676605	2.56252	-2.57219	-0.606397	0.598411	2.61172
0	11393847	0							186.051	1445.46	1013.65	431.812	1044.57	400.894	0	0	3	5	17	0	18	0	169	15	32	87	48	279.647	1.65472	0	0	59	0	0	82	0	10	17	0	1	1.86728	-2.69842	-0.539255	0.53801	2.69499	-2.8778	-0.53808	0.579419	2.69521
0	126569	0							189.727	1426.28	875.649	544.593	859.098	567.18	0	0	3	5	15	0	22	0	170	15	30	88	51	277.294	1.63114	0	0	62	0	0	82	0	10	15	0	1	1.54472	-2.6986	-0.549644	0.590472	2.69543	-2.87782	-0.531099	0.621992	2.69532
0	10615794	4.13245	-44811.4	-236683	-85.4583	-10.0562	10.0562	1.57403	30.4111	415.285	321.64	93.6449	280.905	134.38	1	0	0	1	1	0	0	0	30	1	2	11	8	37.9668	1.26556	0	0	9	0	0	19	0	1	1	0	0	2.97691	-2.70765	-0.244146	0.207033	2.64392	-2.70255	-0.198632	0.273687	2.77685
0	695642	2.36591	-27321.8	-85741.8	79.5182	-9.61121	9.61121	0.51573	14.8304	263.921	108.408	155.513	175.429	88.4923	1	1	0	0	2	0	5	0	9	2	4	6	4	17.0195	1.89106	0	0	3	0	0	3	1	2	0	0	0	2.29801	-1.8811	-0.64588	0.747173	2.03027	-1.8701	-0.452397	0.973731	2.13879
0	45140225	1.79595	-52336.7	-201479	-117.846	-9.48942	9.48942	-0.21447	18.2368	299.006	159.949	139.057	239.839	59.1671	1	1	0	0	1	0	6	0	16	1	2	10	9	26.8387	1.67742	0	0	7	0	2	6	0	0	1	0	0	2.40367	-2.27212	-0.677276	0.682489	2.28587	-2.17803	-0.509035	0.77982	2.39079
0	137659959	3.90898	-40603.1	-212535	-71.8599	-9.46655	9.46655	0.89864	28.4507	369.27	295.281	73.9893	311.667	57.6027	1	0	0	1	1	0	0	0	26	0	1	10	8	34.2114	1.31582	0	0	8	0	0	16	0	0	1	0	1	2.06354	-2.66641	-0.357308	0.33187	2.78448	-2.58369	-0.274265	0.410505	2.81079
0	137643629	3.33978	-162606	-1.21446e+06	10.6382	-8.95754	8.95754	-1.47402	64.2593	772.525	412.557	354.216	502.651	269.874	0	0	3	4	6	0	25	0	54	1	7	36	22	102.502	1.89819	0	0	23	0	3	18	0	7	3	0	0	1.10645	-2.44175	-0.631443	0.629551	2.44133	-2.47472	-0.557087	0.700514	2.54881
0	137661456	3.35266	-89110.2	-518886	6.78668	-9.13622	9.13622	-0.65172	40.1899	522.401	260.667	261.179	396.985	125.416	0	0	2	2	2	0	12	0	30	2	4	20	14	56.3719	1.87906	0	0	13	3	0	10	0	3	1	0	0	2.08833	-2.3275	-0.62191	0.609806	2.28853	-2.53933	-0.358534	0.904937	2.45205
0	137633908	1.02037	-175161	-1.3278e+06	-137.213	-9.29834	9.29834	-1.49521	68.7315	778.437	340.988	423.581	558.517	219.92	0	0	3	4	5	0	27	0	55	1	6	38	28	105.522	1.91857	0	0	26	0	4	17	0	3	4	0	1	1.22349	-2.30742	-0.638941	0.64866	2.42919	-2.42524	-0.531852	0.812508	2.50575
0	16084592	2.70553	-108708	-787826	-22.7106	-8.18099	8.18099	-0.43944	59.7622	697.278	475.035	222.243	576.789	120.49	0	0	2	3	3	0	18	0	51	3	6	28	21	77.6345	1.52225	0	0	22	0	0	23	0	3	3	0	0	1.34026	-2.41928	-0.648087	0.657857	2.346	-2.37493	-0.551078	0.735736	2.50275
0	24861250	3.27243	-127684	-1.01332e+06	3.01928	-8.17006	8.17006	-0.4679	72.9894	811.158	535.239	271.081	691.761	119.397	0	0	2	3	3	0	24	0	61	3	6	34	27	89.2773	1.46356	0	0	28	0	0	27	0	3	3	0	0	1.15996	-2.41938	-0.648474	0.661082	2.34645	-2.37511	-0.53808	0.770354	2.50298
0	6433106	3.22322	-91456.1	-633037	94.5908	-8.28391	8.28391	-1.06875	50.8771	589.646	333.074	256.571	454.875	134.77	0	0	2	2	3	0	21	0	39	2	5	25	19	64.1171	1.64403	0	0	19	0	0	14	0	4	1	0	1	1.30653	-2.31211	-0.642953	0.735907	2.26894	-2.37059	-0.5342	0.805461	2.45565
0	661691	2.66826	-130075	-902800	53.1222	-8.90761	8.90761	-0.9193	53.8069	638.656	332.527	306.128	342.545	296.111	0	0	2	4	7	0	17	0	45	3	10	30	17	84.3096	1.87355	0	0	19	0	1	15	0	6	4	0	0	1.25326	-2.36447	-0.652663	0.678844	2.46627	-2.40573	-0.55533	0.775074	2.49251
0	630034	2.6527	-127508	-908376	91.5226	-9.17445	9.17445	-0.99867	55.4299	642.864	311.063	331.801	358.936	283.928	0	0	2	4	7	0	17	0	45	3	10	30	17	84.3096	1.87355	0	0	19	1	0	15	0	6	4	0	0	1.26987	-2.3622	-0.65406	0.690877	2.46779	-2.40571	-0.526847	0.774553	2.50613
0	5152307	4.93636	-98738.8	-663161	-7.40253	-9.02925	9.02925	-0.93072	46.4299	540.784	283.636	257.148	306.905	233.879	0	0	2	3	5	0	12	0	39	3	8	24	14	65.2856	1.67399	0	0	17	0	0	15	0	3	4	0	0	1.59127	-2.40666	-0.63629	0.644067	2.45871	-2.41601	-0.55	0.669195	2.51784
0	3722206	5.57568	-106117	-714853	-36.6359	-8.86302	8.86302	-0.94567	47.2319	560.306	321.361	238.946	320.303	240.003	0	0	2	4	6	0	12	0	40	3	9	25	14	68.4224	1.71056	0	0	17	0	0	15	0	3	5	0	0	1.59312	-2.40412	-0.646635	0.641488	2.4576	-2.41598	-0.53808	0.658058	2.51799
0	118247614	4.57642	-104932	-820729	-8.78863	-8.52923	8.52923	-0.63332	62.0538	645.84	403.679	242.161	424.864	220.976	0	0	3	4	4	0	17	0	53	3	7	28	22	76.6866	1.44692	0	0	23	0	0	25	0	3	2	0	0	1.34204	-2.7732	-0.539642	0.582006	2.75101	-2.69814	-0.450238	0.632227	2.83293
0	5311459	1.54601	-113217	-767645	42.2575	-8.90353	8.90353	-1.00524	50.8407	611.137	268.625	342.513	492.802	118.335	0	0	3	4	4	0	21	0	38	2	6	27	19	69.1471	1.81966	0	0	19	2	0	11	0	3	3	0	0	1.42256	-2.20062	-0.664913	0.693862	2.24169	-2.1361	-0.526963	0.804827	2.42879
0	6675	3.09136	-122589	-832884	-12.3529	-8.73229	8.73229	-0.85322	52.0577	625.197	252.044	369.17	526.892	98.3057	0	0	2	3	3	0	21	0	39	2	5	28	21	72.8835	1.86881	0	0	20	2	1	11	0	2	3	0	0	1.46069	-2.2	-0.653559	0.684035	2.25606	-2.13704	-0.515983	0.839619	2.43896
0	2823014	0.675624	-114693	-803321	15.2267	-9.09409	9.09409	-0.99018	53.9275	620.056	241.201	374.095	499.745	120.311	0	0	3	4	4	0	21	0	40	2	6	28	21	68.864	1.7216	0	0	21	2	0	12	0	2	3	0	0	1.47282	-2.19019	-0.645654	0.670119	2.27371	-2.16942	-0.522285	0.805915	2.40695
0	57405946	3.18215	-145374	-1.15463e+06	-16.1764	-8.26993	8.26993	-0.98945	70.4371	762.356	388.107	369.046	622.773	139.583	0	0	3	4	5	0	21	0	54	2	7	35	26	99.202	1.83707	0	0	25	2	0	19	0	3	4	0	1	1.2933	-2.6597	-0.654584	0.681583	2.60679	-2.78502	-0.510938	0.814548	2.4874
0	57406119	3.70891	-166893	-1.43717e+06	-600.406	-10.3782	10.3782	1.86916	81.7345	884.274	700.441	183.833	598.83	285.444	0	0	3	5	11	0	0	0	81	7	18	35	22	111.351	1.37471	0	0	24	0	0	46	0	0	11	0	0	1.74318	-2.75894	-0.64578	0.708222	2.82364	-2.94468	-0.633206	0.540674	2.83028
0	68172902	6.77288	-102851	-766673	-79.3173	-9.17565	9.17565	-1.0296	56.2422	606.984	389.428	217.555	395.87	211.114	0	0	3	4	5	0	12	0	49	3	8	26	18	75.1305	1.53328	0	0	20	0	0	23	0	3	3	0	0	1.56095	-2.77307	-0.572839	0.559059	2.75124	-2.69902	-0.486696	0.583831	2.83253
0	11393185	6.50961	-99856.3	-755882	-102.463	-9.118	9.118	-0.56767	58.8958	612.192	374.563	237.629	412.223	199.97	0	0	2	3	3	0	12	0	51	3	6	26	20	70.3349	1.37912	0	0	22	0	0	25	0	1	3	0	0	1.56095	-2.79254	-0.580141	0.61601	2.74163	-2.69674	-0.485124	0.66143	2.84374
0	9946891	2.00101	-91662.2	-687206	-149.53	-9.50901	9.50901	0.32765	54.9494	594.859	379.718	215.141	449.311	145.549	0	0	2	3	3	0	6	0	50	3	6	23	17	68.3453	1.36691	0	0	19	0	0	27	0	1	3	0	0	1.79637	-2.83454	-0.510801	0.558891	2.79374	-2.78479	-0.434966	0.651605	2.89471
0	9966866	7.92788	-73455	-403149	-22.3834	-9.17554	9.17554	-0.89394	33.6319	465.272	209.946	255.325	304.516	160.755	1	1	0	0	3	0	5	0	26	2	5	16	9	56.2373	2.16297	0	0	8	1	0	10	0	3	2	0	2	2.00306	-2.60233	-0.438143	0.548433	2.47706	-2.67295	-0.339883	0.687299	2.53545
0	9977288	3.90196	-101984	-825978	-90.7453	-8.0433	8.0433	0.36391	58.9026	601.874	453.844	142.419	514.911	86.9632	0	0	1	1	3	0	9	0	52	2	5	26	20	75.2179	1.4465	0	0	21	0	0	26	0	2	3	0	0	1.37639	-2.90054	-0.520055	0.5894	2.87992	-2.89792	-0.475835	0.662627	2.9054
0	10199773	3.37932	-111247	-918291	-29.623	-8.32816	8.32816	0.08716	70.9014	775.726	525.916	249.81	680.32	95.4058	0	0	2	3	2	0	17	0	62	0	2	30	24	82.9487	1.33788	0	0	26	0	0	32	0	2	2	0	0	1.53904	-2.65965	-0.612766	0.653239	2.62283	-2.52667	-0.503507	0.707394	2.76844
0	79682737	0							35.9919	347.785	0	0	347.785	0	0	0	2	3	4	0	6	0	30	4	8	20	7	53.4581	1.78194	0	0	12	0	0	10	0	6	2	0	0	1.61478	-2.38585	-0.621254	0.630104	2.3547	-2.42325	-0.576391	0.661731	2.43823
0	25322935	0							56.5139	384.481	0	0	384.481	0	0	0	2	3	5	2	17	1	37	1	6	27	16	66.065	1.78554	0	0	19	0	0	10	0	4	3	0	0	1.23304	-2.28893	-0.667144	0.682702	2.4319	-2.45108	-0.530114	0.680249	2.44664
0	118706871	0							81.0586	491.597	0	0	491.597	0	0	0	2	3	3	0	30	0	65	2	5	39	30	93.7327	1.44204	0	0	32	0	0	26	0	6	1	0	0	1.15979	-2.43036	-0.586504	0.627353	2.43718	-2.48497	-0.491498	0.722212	2.49737
0	165339	0							61.857	438.524	0	0	438.524	0	0	0	2	3	2	0	0	0	58	2	4	24	16	84.9756	1.4651	0	0	18	0	0	34	0	2	3	0	1	2.50644	-2.78954	-0.442592	0.370999	2.73678	-2.82552	-0.398287	0.556127	2.83273
0	444104	0							57.0034	408.583	0	0	408.583	0	0	0	2	3	2	0	0	0	54	2	4	22	14	80.009	1.48165	0	0	16	0	0	32	0	2	3	0	1	4.56557	-2.69529	-0.116334	0.150928	2.66774	-2.81619	-0.0484511	0.196055	2.73161
0	21948240	0							58.8142	447.258	0	0	447.258	0	0	0	2	3	2	0	6	0	52	2	4	24	17	77.1063	1.48281	0	0	19	0	0	28	0	2	2	0	1	1.82288	-2.67512	-0.647624	0.670954	2.74242	-2.78908	-0.53808	0.698709	2.82381
0	1694	0							60.3274	458.714	0	0	458.714	0	0	0	2	3	2	0	6	0	52	2	4	25	18	83.3303	1.60251	0	0	19	1	0	27	0	2	2	0	1	1.82911	-2.67511	-0.643835	0.664372	2.74242	-2.78907	-0.53808	0.805915	2.82381
0	28811851	0							82.0701	501.905	0	0	501.905	0	0	0	3	5	6	0	6	0	75	4	10	37	22	115.848	1.54465	0	0	27	0	0	38	0	4	6	0	0	1.73199	-2.68706	-0.543144	0.529166	2.74917	-2.87908	-0.534648	0.517836	2.74623
0	44314805	0							71.0802	563.003	0	0	563.003	0	0	0	4	6	5	0	16	0	62	4	9	34	22	98.8482	1.59433	0	0	25	0	0	28	0	4	5	0	0	1.48647	-2.66426	-0.624261	0.646339	2.65246	-2.73051	-0.519308	0.727132	2.74263
0	44431558	8.6602	-105666	-679797	28.5602	-9.06139	9.06139	-1.25176	48.8951	602.355	203.774	398.581	443.845	158.51	0	0	3	3	4	0	12	0	34	3	7	25	19	63.3858	1.86429	0	1	18	2	0	9	0	2	2	0	0	1.78031	-2.33162	-0.665983	0.664717	2.34035	-2.42006	-0.471288	0.795306	2.45917
0	44446863	2.25087	-119944	-868585	-307.742	-9.91904	9.91904	-0.67563	49.6854	568.758	364.784	203.974	289.714	279.044	0	0	3	5	8	0	0	0	47	7	15	25	12	78.3548	1.66712	0	0	15	0	0	22	0	2	8	0	0	1.99854	-2.69948	-0.570743	0.630372	2.78286	-2.91542	-0.590496	0.506128	2.8404
0	71606075	3.83419	-108111	-779952	-8.24298	-8.60374	8.60374	-0.56487	48.2103	575.503	300.232	275.27	319.836	255.667	0	0	3	5	7	0	6	0	43	5	12	25	13	76.1576	1.77111	0	0	15	0	0	18	0	6	4	0	0	1.94669	-2.67208	-0.585767	0.649952	2.69005	-2.88122	-0.53808	0.688424	2.52919
0	445533	4.02179	-99500.3	-638135	-300.936	-9.62259	9.62259	-0.22241	39.1763	497.244	327.728	169.516	193.755	303.489	0	0	2	4	8	0	0	0	38	7	15	20	9	64.6574	1.70151	0	0	11	0	0	18	0	2	7	0	0	2.89314	-2.70828	-0.577042	0.631978	2.74848	-2.94084	-0.603353	0.541917	2.55046
0	52947230	5.85377	-133050	-967001	-265.878	-9.79726	9.79726	-0.42876	54.979	664.454	428.963	235.491	323.635	340.819	0	0	3	5	10	0	5	0	52	7	17	28	14	90.3838	1.73815	0	0	16	0	0	24	0	4	8	0	0	1.97775	-2.69365	-0.604603	0.684071	2.75113	-2.89649	-0.640889	0.535047	2.58233
0	44446867	1.97904	-124209	-902717	-338.396	-9.99172	9.99172	-0.45497	54.1126	653.031	442.675	210.356	361.231	291.8	0	0	3	5	8	0	0	0	52	7	15	26	13	84.2114	1.61945	0	0	16	0	0	26	0	2	8	0	0	2.72937	-2.70119	-0.525056	0.540048	2.75218	-2.91567	-0.535907	0.452819	2.67552
0	71606076	4.14032	-96495.1	-643109	-165.851	-8.37972	8.37972	-0.50604	44.6123	548.08	328.637	219.443	346.749	201.332	0	0	3	5	5	0	6	0	40	5	10	22	13	65.6055	1.64014	0	0	15	0	0	18	0	2	5	0	0	1.93843	-2.67245	-0.607706	0.669404	2.69436	-2.8712	-0.53808	0.670474	2.5311
0	71719874	4.39349	-124131	-956898	-117.809	-8.61933	8.61933	-0.34085	62.6998	715.009	438.478	272.559	492.671	222.338	0	0	3	5	7	0	12	0	55	6	13	30	20	87.4064	1.58921	0	0	22	0	0	25	0	3	5	0	0	1.37524	-2.68021	-0.615625	0.681294	2.69723	-2.90148	-0.53808	0.713924	2.52163
0	2950	2.33713	-73398.7	-424201	-85.7672	-9.42068	9.42068	-1.22154	33.1823	412.752	220.056	192.696	262.889	149.863	0	0	1	1	4	0	12	0	26	2	6	18	12	36.9085	1.41956	0	0	14	0	0	8	0	0	4	0	0	1.91328	-2.28087	-0.755092	0.790741	2.37076	-2.25825	-0.701057	0.764678	2.43571
0	4478249	16.4252	-60627.2	-306448	-127.01	-10.1098	10.1098	-0.84863	26.4363	359.161	234.052	125.109	208.029	151.132	1	0	0	1	1	3	0	1	25	0	1	12	6	44.4809	1.77924	0	0	6	0	0	13	0	1	4	0	1	2.13139	-2.74886	-0.466699	0.145933	2.76834	-3.51434	-0.3339	0.123	2.4339
0	4462	1.81659	-76570	-483637	-104.254	-9.55522	9.55522	-1.5279	39.8503	491.279	364.691	126.589	414.844	76.4347	0	0	1	2	4	0	0	0	36	0	4	18	12	49.7557	1.3821	0	0	14	0	0	18	0	0	4	0	0	2.80262	-2.4372	-0.129057	0.0528727	2.46606	-2.39314	-0.00105541	0.127939	2.54457
0	21307	3.75208	-63576.8	-370399	-32.7658	-8.43382	8.43382	-0.11979	35.3923	451.137	280.576	170.561	383.473	67.6633	1	1	0	0	2	0	6	0	29	1	3	16	12	47.7562	1.64676	0	0	12	0	0	13	0	1	2	0	1	1.79624	-2.47891	-0.598994	0.587419	2.47518	-2.49786	-0.494609	0.671762	2.51952
0	5601	5.02419	-78027.3	-341730	-188.731	-9.87414	9.87414	-1.03995	23.589	361.512	106.415	255.097	196.089	165.424	1	1	0	0	2	0	5	0	19	0	2	14	10	38.3461	2.01822	0	0	8	0	3	5	0	0	2	0	1	2.37132	-2.22617	-0.590985	0.461565	2.50501	-2.3865	-0.475205	0.499895	2.38115
0	6224	4.7465	-71445.4	-337649	-608.474	-7.38022	7.38022	4.12158	90.308	443.952	376.568	67.3836	56.1615	387.79	1	0	0	2	1	6	0	3	21	1	2	16	3	40.7129	1.93871	0	0	6	0	0	5	0	0	7	0	0	-0.881032	-2.55378	-0.549713	0.840427	2.57328	-2.70934	-0.513645	0.123	2.49498
0	11458848	2.42354	-68801.8	-383694	-69.4751	-8.56786	8.56786	-0.25458	33.7207	433.619	235.967	197.652	309.991	123.628	1	1	0	0	3	0	12	0	28	3	6	17	12	43.6916	1.56041	0	0	13	0	0	11	0	1	3	0	0	1.78525	-2.2782	-0.646094	0.704446	2.25204	-2.29109	-0.576274	0.805915	2.4039
0	3598	2.29226	-106774	-607577	-62.7928	-9.28342	9.28342	-0.552	41.5648	516.269	130.451	385.818	463.267	53.0022	0	0	2	2	2	0	12	0	27	2	4	21	19	47.2567	1.75025	0	0	13	6	0	6	0	0	2	0	0	2.14568	-2.33117	-0.673997	0.659382	2.36424	-2.21584	-0.352463	1.03299	2.5401
0	134201880	3.07086	-139464	-958082	-107.804	-9.43653	9.43653	-1.6635	53.4853	665.004	272.115	392.889	338.902	326.102	0	0	3	5	6	0	12	0	43	0	6	30	19	87.0033	2.02333	0	0	19	0	3	13	0	4	3	0	1	1.63867	-2.45038	-0.64553	0.700711	2.45813	-2.44371	-0.53808	0.746056	2.49309
0	134201885	3.7746	-137933	-961202	-85.8536	-9.2496	9.2496	-1.52758	54.8121	674.198	262.571	411.626	428.19	246.008	0	0	3	4	5	0	12	0	44	0	5	30	21	86.2088	1.95929	0	0	20	0	3	14	0	3	3	0	1	1.66425	-2.45044	-0.595935	0.630186	2.45814	-2.44372	-0.510369	0.696158	2.49308
0	137659911	5.31252	-176644	-1.38707e+06	-263.903	-9.18679	9.18679	-1.6033	69.5992	811.512	472.79	338.722	469.613	341.899	0	0	3	5	8	0	12	0	60	1	9	37	23	118.065	1.96775	0	0	23	0	3	23	0	4	6	0	1	1.66961	-2.53298	-0.575245	0.496775	2.63631	-2.6232	-0.534573	0.497973	2.59013
0	9915237	2.84077	-152227	-1.36581e+06	-2.45924	-8.88512	8.88512	-0.34494	88.8973	940.906	619.456	321.45	687.514	253.392	0	0	3	5	5	0	23	0	77	3	8	40	30	113.428	1.47309	0	0	32	0	0	37	0	5	3	0	0	1.23396	-2.63145	-0.580463	0.674962	2.59952	-2.77504	-0.525511	0.764734	2.68088
0	11509369	2.04549	-105803	-771837	-6.34407	-8.22612	8.22612	-1.05298	55.9081	625.941	336.511	283.545	452.463	173.477	0	0	2	3	3	0	15	0	45	2	5	26	19	81.3641	1.80809	0	0	18	0	1	19	0	4	1	0	2	1.77115	-2.6518	-0.538622	0.460426	2.59505	-2.72974	-0.35545	0.673428	2.60599
0	44440747	5.39843	-145039	-1.2982e+06	39.9303	-8.86321	8.86321	-0.25214	82.7102	861.44	557.239	304.201	616.834	244.606	0	0	3	5	5	0	23	0	71	3	8	38	28	106.596	1.50135	0	0	30	0	0	33	0	5	3	0	0	1.3151	-2.63125	-0.580876	0.675344	2.57736	-2.77516	-0.525511	0.762203	2.67944
0	11654606	1.05546	-109481	-881424	12.2414	-8.05196	8.05196	-0.88935	63.007	680.646	429.283	245.58	500.676	179.971	0	0	3	4	4	0	15	0	52	1	5	28	20	87.9452	1.69125	0	0	20	0	0	24	0	4	2	0	2	1.79844	-2.68918	-0.463754	0.398239	2.62222	-2.7193	-0.302906	0.560993	2.63794
0	44291993	30.6476	-238138	-2.36711e+06	-680.496	0.86782	-0.86782	8.0617	83.3346	801.047	295.13	505.917	368.122	432.925	0	0	2	4	7	12	6	0	72	1	8	46	18	139.074	1.93158	0	0	21	0	0	26	0	2	19	0	4	2.03243	-2.80283	-0.469636	0.468884	2.73313	-2.89989	-0.419839	0.437188	2.83232
0	71717836	2.71688	-199205	-1.57603e+06	-916.198	-11.9736	11.9736	-1.58082	49.9035	588.084	176.197	411.887	52.1176	535.967	0	0	3	5	21	0	0	0	44	15	36	32	5	77.8374	1.76903	0	0	6	0	0	12	0	0	21	0	5	3.49955	-2.75464	-0.662285	0.71211	2.78434	-2.90671	-0.750843	0.68477	2.62126
0	91929728	73.4506	-265619	-3048187	-800.545	0.4977	-0.4977	7.43992	120.123	1052.29	516.391	535.346	528.876	523.414	0	0	3	5	6	12	0	0	109	0	6	55	32	177.445	1.62793	0	0	33	0	0	54	0	0	18	0	4	1.3333	-3.00181	-0.263187	0.0290288	2.98605	-2.93091	-0.3339	0.123	3.07883
0	90664019	41.9718	-241545	-2.34636e+06	-1319.02	-8.52111	8.52111	0.75655	177.684	1008.27	726.108	282.161	386.687	621.582	0	0	2	4	8	12	0	4	79	1	9	49	16	165.643	2.09674	0	0	19	0	0	30	0	2	20	0	4	-4.05785	-2.78747	-0.263178	0.633914	2.75937	-2.90659	-0.3339	0.123	2.8323
0	91900380	12.2763	-220066	-1.79103e+06	-834.898	-0.34971	0.34971	8.80467	66.0559	758.202	277.479	480.723	247.256	510.946	0	0	2	4	8	12	0	0	59	1	9	39	10	116.093	1.96768	0	0	13	0	0	20	0	2	20	0	4	3.12489	-2.78103	-0.263184	0.0524498	2.75937	-2.92577	-0.3339	0.123	2.61455
0	284	4.02489	-18374.8	-39030.3	-89.9561	-11.5033	11.5033	1.00836	4.69759	161.68	97.0161	64.6638	21.1431	140.537	1	1	0	0	2	0	0	0	5	2	4	3	0	7.60964	1.52193	0	0	1	0	0	2	0	0	2	0	0	1.9756	-1.74076	-0.50707	0.481556	1.77903	-1.91044	-0.487541	0.50056	1.59171
0	44291944	8.78205	-177738	-1.27935e+06	-565.581	0.9506	-0.9506	9.77445	43.7616	574.279	79.1135	495.166	46.8275	527.452	0	0	2	4	7	12	0	0	37	0	7	30	5	75.3468	2.0364	0	0	6	0	0	7	0	3	17	0	4	3.44717	-2.82258	-0.263178	-0.0330353	2.7053	-2.90036	-0.3339	0.123	2.61655
0	44291772	29.7802	-140979	-1.00874e+06	-511.024	-4.18819	4.18819	3.46644	54.3579	651.3	324.76	326.54	409.306	241.994	0	0	2	4	5	6	6	0	48	0	5	28	15	82.9825	1.7288	0	0	15	0	0	20	0	0	11	0	2	1.79158	-2.76144	-0.49788	0.489005	2.73884	-2.85196	-0.423288	0.595944	2.65765
0	46903185	5.18087	-130557	-1.0749e+06	59.3322	-8.79824	8.79824	-0.63399	68.7972	714.635	375.051	339.584	612.9	101.735	0	0	3	4	4	0	22	0	56	1	5	33	26	95.0735	1.69774	0	0	25	0	1	23	0	4	2	0	1	1.26303	-2.74717	-0.632599	0.70264	2.74852	-2.77217	-0.527711	0.799923	2.75739
0	3781244	0.555112	-144548	-1.60862e+06	18.1696	-8.92685	8.92685	0.30461	96.5029	815.075	563.515	251.56	776.526	38.5483	0	0	3	4	4	0	24	0	84	2	6	40	36	106.622	1.26931	0	0	36	0	0	44	0	2	2	0	0	1.63791	-2.7786	-0.586199	0.641686	2.75205	-2.77039	-0.491923	0.702128	2.81625
0	5399944	4.69138	-65300.6	-351566	48.4206	-8.62707	8.62707	-0.84198	30.9763	418.953	241.084	172.816	312.492	106.461	1	1	0	0	3	0	13	0	24	1	4	16	10	43.2305	1.80127	0	0	11	1	0	8	0	3	1	0	0	1.75459	-2.23486	-0.635018	0.620664	2.22602	-2.2421	-0.56694	0.74848	2.40861
0	919914	3.29705	-73076.8	-443743	6.43787	-8.63941	8.63941	-0.39507	35.1255	438.833	249.624	189.209	226.616	212.217	1	0	0	1	3	0	6	0	30	3	6	18	9	51.1676	1.70559	0	0	12	0	0	12	0	4	2	0	0	1.92044	-2.44979	-0.585905	0.614723	2.4337	-2.68293	-0.526834	0.725872	2.43091
0	25102606	1.20474	-141712	-1.27633e+06	-118.392	-9.02942	9.02942	-0.64813	70.33	639.016	393.52	245.496	510.859	128.158	0	0	3	5	5	0	18	0	58	2	7	34	26	95.9027	1.6535	0	0	26	0	1	24	0	1	5	0	1	1.72217	-2.67045	-0.609602	0.647404	2.65533	-2.62127	-0.509932	0.691034	2.74272
0	2185046	3.98338	-83772.2	-603365	23.9092	-9.00096	9.00096	-0.3107	54.6247	613.512	362.839	246.901	568.336	45.1754	0	0	2	3	1	0	18	0	45	1	2	24	21	56.7872	1.26194	0	0	22	0	0	21	0	1	1	0	0	1.29366	-2.43945	-0.647973	0.698112	2.40923	-2.54141	-0.53808	0.805915	2.45819
0	24816792	7.17772	-140754	-1.22976e+06	7.47818	-8.90843	8.90843	-0.40035	76.8918	810.313	503.203	307.109	672.923	137.389	0	0	2	3	3	0	17	0	66	2	5	36	23	101.117	1.53208	0	0	28	0	0	30	0	4	4	0	0	1.18221	-2.75899	-0.587516	0.64654	2.77782	-2.81253	-0.518306	0.716109	2.75359
0	4673629	2.37292	-74531	-448922	22.5083	-8.4685	8.4685	-0.30107	40.6791	515.12	313.446	201.674	402.307	112.813	0	0	1	2	3	0	11	0	33	1	4	19	13	55.8591	1.6927	0	0	14	0	0	14	0	2	2	0	1	1.45558	-2.2598	-0.586624	0.65148	2.77041	-2.35099	-0.504482	0.757603	2.84152
0	660340	2.85545	-72447.2	-444334	75.3508	-8.76227	8.76227	-0.22881	37.1635	455.31	274.037	181.273	412.263	43.0469	1	1	0	0	2	0	11	0	30	0	2	18	13	51.3266	1.71089	0	0	13	1	0	12	0	3	1	0	0	1.71043	-2.4139	-0.550503	0.607514	2.54046	-2.53398	-0.40977	0.69944	2.55156
0	4004	3.65397	-91832.8	-587616	-261.628	-10.0661	10.0661	-2.8377	44.5111	535.653	359.195	176.458	357.103	178.55	0	0	2	3	4	0	0	0	38	0	4	19	8	67.9816	1.78899	0	0	10	0	0	19	0	0	6	1	2	4.66249	-2.47444	-0.229976	0.0578128	2.60952	-2.54126	-0.0665446	0.123	2.77427
0	10638747	4.4129	-75603.2	-441730	-28.1254	-8.24326	8.24326	-0.00079	39.7359	513.928	317.215	190.747	426.934	86.9937	0	0	1	2	2	0	9	0	33	2	4	18	13	55.7559	1.68957	0	1	13	0	0	15	0	2	2	0	0	1.81967	-2.49276	-0.535809	0.445408	2.46592	-2.65652	-0.507943	0.586886	2.47226
0	57340097	3.05688	-90327.8	-680958	-0.32638	-7.93704	7.93704	0.37775	53.6734	594.521	401.569	187.775	539.858	54.6625	0	0	2	3	2	0	15	0	46	1	3	24	19	65.5378	1.42473	0	0	20	0	0	22	0	2	2	0	0	1.64334	-2.50911	-0.531396	0.577188	2.4787	-2.65868	-0.51918	0.67806	2.5236
0	10657206	2.89329	-67770	-402316	-31.5235	-8.23234	8.23234	0.14053	37.3527	492.205	348.807	137.824	386.779	105.426	1	0	0	1	2	0	9	0	33	2	4	17	12	50.3593	1.52604	0	0	13	0	0	16	0	2	2	0	0	1.81489	-2.45036	-0.523294	0.46669	2.4452	-2.53545	-0.470191	0.542255	2.49064
0	11046579	7.66265	-107786	-751847	-69.9479	-8.48789	8.48789	-1.81243	50.7383	569.631	271.563	277.528	347.306	222.324	0	0	3	4	5	0	10	0	40	5	10	27	18	60.9231	1.52308	0	0	21	0	0	13	0	1	5	0	0	1.48882	-2.37591	-0.638957	0.68524	2.39699	-2.43827	-0.613266	0.700431	2.44067
0	44300730	6.30282	-106886	-687329	-172.003	-8.24251	8.24251	-1.32385	43.5885	515.26	246.75	258.202	298.962	216.298	0	0	3	4	5	0	6	0	36	5	10	24	16	62.0012	1.72226	0	0	17	0	1	12	0	1	5	0	0	1.77288	-2.44706	-0.688293	0.700208	2.44888	-2.46851	-0.622801	0.766562	2.52022
0	447096	4.9475	-91441.6	-507689	-519.764	-11.2267	11.2267	0.89444	30.0763	394.54	243.659	150.881	110.167	284.373	0	0	2	4	9	0	0	0	29	7	16	16	5	48.7366	1.68057	0	0	6	0	0	13	0	0	9	1	0	2.53943	-2.70759	-0.712789	0.744778	2.7823	-2.90629	-0.973556	0.523273	2.60019
0	440317	11.0817	-160690	-1.16819e+06	-664.72	-9.07352	9.07352	-1.4453	57.1827	671.411	374.339	297.072	145.903	525.508	0	0	3	5	13	0	9	0	47	9	22	31	5	104.462	2.2226	0	0	10	0	0	16	0	5	12	3	1	1.56731	-2.51723	-0.731771	0.770666	2.77872	-2.70721	-0.807243	0.550502	2.7568
0	23626732	2.40543	-162336	-1.68262e+06	93.5361	-8.21956	8.21956	-0.32551	98.2357	942.967	637.282	305.684	817.406	125.561	0	0	3	4	5	0	23	0	84	3	8	44	33	120.45	1.43393	0	0	36	0	0	40	0	6	2	0	0	1.09457	-2.70158	-0.58366	0.640077	2.69661	-2.69915	-0.519835	0.753756	2.71705
0	137659778	10.65	-146932	-955346	-139.897	-8.56292	8.56292	-1.50619	52.3405	665.534	265.586	394.863	264.918	400.616	0	0	4	6	7	0	15	0	42	4	11	30	17	93.0933	2.21651	0	0	16	0	3	12	0	5	4	0	2	1.44273	-2.33107	-0.648704	0.72953	2.35706	-2.5722	-0.562869	0.813228	2.46408
0	137638304	11.8153	-111012	-716960	71.5313	-8.59936	8.59936	-1.36387	53.4575	654.408	256.499	391.965	367.501	286.907	0	0	4	5	6	0	15	0	38	4	10	26	14	79.4338	2.09036	0	0	15	0	0	12	1	5	3	0	2	1.41254	-2.33106	-0.675067	0.738727	2.35703	-2.5722	-0.585547	0.841238	2.43889
0	8378	2.58767	-207343	-2127342	-625.524	-9.73754	9.73754	1.51943	88.1785	807.893	630.498	177.395	310.271	497.621	0	0	3	5	19	0	0	0	88	13	32	42	20	146.689	1.66692	0	0	23	0	0	46	0	6	13	0	0	1.4956	-2.81158	-0.5856	0.650389	2.85475	-3.01991	-0.621752	0.577424	2.68081
0	46224684	4.84629	-111730	-894170	216.341	-8.07282	8.07282	-0.68516	63.7491	687.615	427.896	249.011	455.253	232.362	0	0	4	6	5	0	27	0	50	4	9	31	23	77.7888	1.55578	0	0	23	0	0	19	0	7	0	0	1	1.21482	-2.47897	-0.698056	0.763151	2.42063	-2.64481	-0.553856	0.874046	2.50299
0	91936123	21.5489	-130672	-1.03719e+06	-306.2	-5.38345	5.38345	2.05399	62.577	677.437	384.296	293.14	503.94	173.497	0	0	1	3	2	3	12	0	54	1	3	30	19	88.8347	1.64509	0	0	21	0	0	24	0	1	7	0	1	1.99713	-2.63488	-0.560594	0.618817	2.70734	-2.65738	-0.456794	0.720234	2.70583
0	40247	18.684	-158570	-1.29284e+06	-12.7156	-11.5736	11.5736	-5.42203	69.3387	737.892	372.203	331.258	334.665	403.227	0	0	3	5	8	0	12	1	57	7	15	36	19	108.129	1.89699	0	0	22	0	0	21	0	4	8	0	2	1.37585	-2.68294	-0.610155	0.689169	2.75351	-2.89595	-0.563158	0.700692	2.62961
0	22084082	4.4741	-81502.8	-449708	-150.531	-8.7478	8.7478	-0.92189	30.9043	413.793	209.882	198.824	154.147	259.646	0	0	2	3	5	0	9	0	26	6	11	18	8	46.548	1.79031	0	0	11	0	0	8	0	2	5	0	0	2.05498	-2.23531	-0.649107	0.714995	2.29185	-2.36205	-0.601007	0.727162	2.38853
0	4774445	1.92928	-82203	-471956	-198.818	-8.94433	8.94433	-0.99421	34.7047	442.147	266.019	176.127	222.981	219.165	0	0	2	4	5	0	5	0	29	5	10	18	9	53.1643	1.83325	0	0	11	0	0	11	0	1	5	0	1	2.05228	-2.64059	-0.607732	0.597892	2.60074	-2.52972	-0.53325	0.651444	2.72281
0	134202046	4.95486	-143047	-1001548	-178.248	-9.25547	9.25547	-1.54223	55.1877	670.248	320.875	349.372	417.174	253.073	0	0	3	4	6	0	12	0	46	0	6	30	20	91.8634	1.99703	0	0	19	0	3	16	0	3	4	0	1	1.63853	-2.45225	-0.564976	0.557771	2.45818	-2.44372	-0.511201	0.577178	2.50152
0	134201953	4.97614	-140377	-957830	-140.155	-9.27299	9.27299	-1.54354	52.8053	627.461	236.089	391.372	387.192	240.269	0	0	3	4	5	0	12	0	42	0	5	29	20	89.0483	2.1202	0	0	18	1	3	13	0	3	3	0	1	1.68855	-2.44743	-0.594005	0.617307	2.45833	-2.44355	-0.472867	0.705726	2.50323
0	9887381	0.904022	-105906	-819280	0.64779	-8.09302	8.09302	-0.911	59.9134	678.423	410.907	261.071	490.814	187.61	0	0	3	4	4	0	15	0	49	2	6	27	19	84.3027	1.72046	0	0	19	0	0	22	0	4	2	0	2	1.76865	-2.6518	-0.522455	0.406558	2.59505	-2.72974	-0.35313	0.567086	2.60601
0	44440750	3.1627	-171664	-1.63779e+06	3.88517	-8.7194	8.7194	-0.36979	103.038	1073.63	714.255	359.375	804.875	268.755	0	0	3	5	5	0	23	0	91	3	8	45	33	131.744	1.44773	0	0	36	0	0	46	0	6	3	0	0	1.17759	-2.63143	-0.562581	0.600303	2.60043	-2.77594	-0.500369	0.680665	2.67952
0	91932901	25.9111	-239800	-2.38573e+06	-674.313	0.34677	-0.34677	8.04233	82.4274	810.213	268.577	541.636	381.872	428.341	0	0	2	4	7	12	12	0	69	1	8	47	19	134.563	1.95018	0	0	22	0	0	22	0	2	19	0	4	2.00026	-2.80131	-0.521662	0.579224	2.7104	-2.89891	-0.451783	0.614933	2.60362
0	44455815	2.11275	-259179	-2751708	-964.203	-9.69239	9.69239	0.67814	97.2345	947.867	681.969	265.898	382.173	565.694	0	0	3	5	22	0	0	0	96	14	36	50	21	155.452	1.61929	0	0	27	0	0	46	0	2	21	0	0	1.4708	-2.77495	-0.635635	0.706313	2.84202	-2.99007	-0.712768	0.545667	2.6315
0	11851095	6.364	-150389	-1.44761e+06	-99.5857	-8.85513	8.85513	-0.6573	75.3378	662.84	522.123	140.717	569.991	92.8494	0	0	2	3	7	0	12	0	66	0	7	36	24	101.69	1.54076	0	0	27	0	0	30	0	2	7	0	0	1.40988	-2.84034	-0.560172	0.476424	2.82575	-2.90358	-0.533926	0.544695	2.81872
0	24860373	4.16456	-150459	-1.36001e+06	-168.345	-8.92375	8.92375	-0.62552	75.3378	772.95	591.788	181.163	669.915	103.036	0	0	2	3	7	0	12	0	66	0	7	36	24	101.69	1.54076	0	0	27	0	0	30	0	2	7	0	0	1.39302	-2.84034	-0.560943	0.469092	2.82574	-2.90358	-0.533904	0.513311	2.81872
0	24860376	3.28598	-128452	-1.17542e+06	-34.1073	-8.91057	8.91057	-0.64073	67.5466	609.254	429.421	179.833	530.747	78.5074	0	0	2	3	5	0	12	0	58	0	5	32	22	87.8454	1.51458	0	0	25	0	0	26	0	2	5	0	0	1.43406	-2.84035	-0.577327	0.563123	2.82572	-2.90358	-0.53808	0.583202	2.81871
0	725789	2.41294	-64143.4	-400516	81.9373	-8.74844	8.74844	-0.20558	35.6503	431.975	301.707	130.268	382.975	49.0008	1	1	0	0	2	0	11	0	30	0	2	17	12	46.2404	1.54135	0	0	13	0	0	13	0	3	1	0	0	1.67908	-2.41477	-0.536031	0.608256	2.53948	-2.53455	-0.457545	0.693035	2.55082
0	227091	0.575512	-109331	-836277	-28.9956	-9.24763	9.24763	-1.40581	55.291	657.629	430.189	227.44	503.771	153.858	0	0	2	4	6	0	0	0	50	2	8	26	14	81.0951	1.6219	0	0	18	0	0	24	0	4	4	0	0	1.79539	-2.51055	-0.492466	0.373454	2.68296	-2.57625	-0.464546	0.338851	2.60085
0	23786511	5.51766	-90340.9	-650855	-14.1429	-8.09828	8.09828	0.1524	53.6734	608.735	409.209	195.639	540.228	68.5064	0	0	2	3	2	0	15	0	46	2	4	24	19	65.5378	1.42473	0	0	20	0	0	22	0	2	2	0	0	1.55	-2.50465	-0.558997	0.567246	2.4806	-2.65607	-0.512236	0.664272	2.50761
0	563605	2.84639	-86741.9	-590425	5.26211	-8.22366	8.22366	0.12019	50.5799	604.405	378.011	222.5	491.391	113.014	0	0	2	3	2	0	15	0	43	2	4	23	18	62.1802	1.44605	0	0	19	0	0	20	0	2	2	0	0	1.40904	-2.49545	-0.562496	0.584511	2.46197	-2.65439	-0.519975	0.693985	2.4879
0	10513752	5.76802	-67769.8	-396308	-31.3266	-8.23352	8.23352	0.13894	37.3527	487.078	345.921	136.156	396.424	90.6545	1	0	0	1	2	0	9	0	33	2	4	17	12	50.3593	1.52604	0	0	13	0	0	16	0	2	2	0	0	1.71963	-2.49465	-0.535621	0.444367	2.46285	-2.65691	-0.512321	0.558943	2.45309
0	89962918	8.31561	-124183	-1.0253e+06	60.2342	-9.53144	9.53144	-1.06857	63.5354	668.08	275.201	201.754	443.811	224.269	0	0	3	5	6	0	17	0	53	1	7	31	18	92.969	1.75413	0	0	21	0	0	22	0	6	3	0	1	1.34596	-2.76942	-0.622274	0.686957	2.75261	-2.70276	-0.556855	0.732781	2.84593
0	118937633	2.76114	-102637	-750572	97.9649	-8.4221	8.4221	-0.31037	53.6281	590.16	291.167	208.633	499.135	91.0249	0	0	2	3	2	0	15	0	45	0	2	26	20	71.9842	1.59965	0	0	20	0	1	19	0	4	1	0	0	1.26778	-2.51598	-0.587311	0.666013	2.80073	-2.62645	-0.474888	0.768831	2.87721
0	91809328	5.86003	-119053	-872896	-166.957	-9.9451	9.9451	-1.10654	56.9612	607.364	93.2348	194.012	489.641	117.723	0	0	3	4	4	0	6	0	49	1	5	26	19	88.0202	1.79633	0	0	18	1	1	23	0	1	4	0	1	1.62642	-2.72769	-0.509174	0.421574	2.96475	-2.69398	-0.348248	0.577715	3.03177
0	54584586	5.16504	-109515	-881865	-85.0216	-8.95629	8.95629	-0.60034	60.1242	628.032	166.426	158.614	506.677	121.354	0	0	3	4	4	0	12	0	51	0	4	28	20	73.2098	1.43549	0	0	23	0	0	23	0	1	4	0	0	1.47187	-2.64397	-0.572278	0.573071	2.70834	-2.64269	-0.477447	0.653618	2.7336
0	57405385	2.45333	-125748	-895011	-78.2189	-8.83086	8.83086	-0.62779	61.1589	689.453	247.325	300.199	578.092	111.361	0	0	2	3	3	0	18	0	50	2	5	30	23	84.9574	1.69915	0	0	23	1	1	20	0	2	3	0	0	1.22583	-2.73275	-0.63998	0.700595	2.71488	-2.77493	-0.53808	0.805915	2.70849
0	44395386	7.22781	-124249	-923783	-194.742	-9.09362	9.09362	-0.31086	60.337	689.444	299.089	227.981	470.591	218.853	0	0	2	3	5	0	6	0	53	1	6	29	19	75.7817	1.42984	0	0	22	0	0	24	0	0	7	0	0	1.34309	-2.59355	-0.577521	0.597131	2.88314	-2.68783	-0.526115	0.588436	2.86655
0	667748	1.01091	-70350.4	-418037	107.336	-9.56102	9.56102	-0.56598	38.5479	494.583	270.554	224.029	444.064	50.5193	0	0	1	1	3	0	18	0	29	0	3	19	16	44.3039	1.52772	0	0	15	1	0	10	0	3	0	0	0	1.59968	-2.19293	-0.557136	0.634129	2.1998	-2.05391	-0.446087	0.802858	2.36702
0	6479877	10.8603	-109152	-1095629	83.3531	-12.8352	12.8352	-4.62021	87.2396	825.992	129.016	20.0624	799.93	26.0618	0	0	2	3	0	0	6	1	81	0	0	31	30	84.1283	1.03862	0	0	30	0	0	50	0	1	0	0	0	1.69796	-2.69778	-0.392369	0.499252	2.66123	-2.53241	-0.331654	0.492294	2.80231
0	16728618	2.02128	-104948	-685428	-5.05271	-8.34974	8.34974	-0.60775	51.1115	661.159	314.516	264.1	414.345	246.814	0	0	2	4	4	0	12	0	42	2	6	25	15	74.7487	1.77973	0	1	17	0	0	17	0	4	3	0	0	1.72357	-2.33808	-0.646062	0.641459	2.31624	-2.64444	-0.519316	0.838639	2.45687
0	11210440	1.78004	-81541.9	-516123	16.2222	-9.07257	9.07257	-0.14985	46.6275	573.477	173.848	266.297	525.134	48.343	0	0	2	3	2	0	12	0	37	0	2	20	18	59.2629	1.6017	0	1	16	1	0	17	0	1	1	0	0	1.7748	-2.55634	-0.552001	0.563634	2.44237	-2.56673	-0.238743	0.805915	2.54179
0	5481743	6.41703	-143475	-1.22738e+06	-51.0906	-9.16128	9.16128	-0.47905	81.143	829.363	279.592	360.995	723.71	105.653	0	0	2	3	3	0	18	0	65	0	3	36	30	102.936	1.58363	0	0	29	2	0	29	0	1	3	0	1	1.13991	-2.80715	-0.61515	0.663855	2.81403	-2.84631	-0.464273	0.798934	2.79395
0	44431971	2.59341	-163898	-1.31797e+06	-118.954	-9.22299	9.22299	-0.26346	77.5734	849.595	290.279	398.872	745.901	103.694	0	0	3	4	4	0	18	0	64	3	7	37	30	115.726	1.80822	0	1	27	1	2	27	0	3	3	0	0	1.18336	-2.80156	-0.64519	0.616228	2.76451	-2.88169	-0.475112	0.867373	2.72418
0	62707282	14.0883	-73876.9	-572831	120.269	-12.6434	12.6434	-4.85785	57.6374	634.69	121.252	28.9322	609.888	24.8019	0	0	1	2	0	0	6	1	53	0	0	21	20	57.1412	1.07814	0	0	20	0	0	32	0	1	0	0	0	1.61258	-2.69762	-0.281155	0.373347	2.65892	-2.52804	-0.195772	0.361767	2.80208
0	56683103	10.8299	-116336	-1.21074e+06	72.3958	-12.7324	12.7324	-4.55179	93.4268	879.276	118.44	19.9756	860.368	18.9079	0	0	2	3	0	0	6	1	87	0	0	33	32	89.7722	1.03186	0	0	32	0	0	54	0	1	0	0	0	1.79022	-2.69781	-0.391508	0.500486	2.67346	-2.59719	-0.331642	0.493171	2.80237
0	71461787	4.46158	-120917	-891725	-36.5193	-9.3852	9.3852	-1.1045	66.325	751.914	199.995	230.749	592.673	159.241	0	0	2	3	3	0	12	0	59	0	3	30	23	89.3977	1.51521	0	0	23	0	0	29	0	3	4	0	0	1.22722	-2.79526	-0.508026	0.487503	2.68608	-2.90732	-0.379018	0.608259	2.58984
0	4201	4.11457	-62528.6	-374398	60.0038	-8.5963	8.5963	-0.18721	32.1439	413.629	148.415	76.5742	212.498	201.132	1	1	0	0	3	0	0	0	30	3	6	15	6	48.4644	1.61548	0	0	9	0	0	15	0	5	1	0	0	1.93149	-2.74925	-0.671868	0.731672	2.67042	-2.75065	-0.650055	0.731721	2.72889
0	112500050	3.12729	-127917	-967900	-45.9893	-9.8835	9.8835	-1.27785	64.2662	727.002	215.198	315.663	431.035	295.967	0	0	2	4	5	0	12	0	54	2	7	31	20	92.25	1.70833	0	0	22	0	0	23	0	3	5	0	1	1.1548	-2.83788	-0.60733	0.649424	2.75847	-2.93751	-0.537782	0.6785	2.68475
0	199	1.90958	-38312.8	-177819	3.34651	-9.30448	9.30448	1.27767	22.5351	355.213	176.833	45.8599	132.52	222.693	1	0	0	1	2	0	0	0	23	3	5	9	4	31.1293	1.35345	0	0	5	0	0	14	0	4	0	0	0	2.76758	-2.59193	-0.262422	0.341677	2.54366	-2.69059	-0.209431	0.379986	2.59089
0	122197779	4.24594	-126270	-992206	185.26	-9.46123	9.46123	-1.10629	64.9334	725.569	201.212	276.146	510.762	214.807	0	0	2	3	7	0	16	0	54	0	7	32	19	94.4178	1.74848	0	0	21	0	0	22	0	8	2	0	1	1.05633	-2.82096	-0.489944	0.521355	2.76051	-2.94641	-0.382697	0.601098	2.6782
0	71559370	9.65214	-148791	-1.43817e+06	-51.5933	-8.98926	8.98926	-0.92829	79.0274	725.965	200.42	182.398	468.633	257.333	0	0	2	4	7	0	12	0	69	2	9	37	26	107.273	1.55468	0	0	28	0	0	32	0	4	5	0	0	1.07599	-2.77302	-0.561185	0.603809	2.92817	-2.88709	-0.539926	0.582385	2.89251
0	5362436	6.92546	-85732.4	-574650	74.3101	-8.45716	8.45716	-0.64458	49.7982	625.23	231.013	122.382	439.636	185.594	0	0	1	2	3	0	6	0	45	3	6	22	14	67.4818	1.4996	0	0	16	0	0	23	0	5	1	0	0	1.60595	-2.61586	-0.546407	0.544383	2.56447	-2.71094	-0.49136	0.648357	2.70085
0	67462786	2.66775	-126656	-1.07766e+06	116.006	-8.27566	8.27566	-0.64537	72.2078	803.248	298.957	144.808	596.377	206.871	0	0	3	4	6	0	21	0	63	1	7	33	25	95.7557	1.51993	0	0	25	0	0	30	0	6	2	0	0	1.42281	-2.65304	-0.540021	0.556808	2.55899	-2.78746	-0.500053	0.631325	2.53694
0	4173	3.62587	-56965.2	-275764	-0.26452	-9.98398	9.98398	-1.05214	22.2671	339.669	126.099	116.67	180.214	159.455	1	1	0	0	2	0	5	0	21	1	3	12	5	38.6898	1.84237	0	0	6	0	0	9	0	3	3	0	0	2.53749	-2.39718	-0.488407	0.456407	2.47679	-2.44283	-0.383062	0.474151	2.46317
0	3902	1.73972	-77428.5	-512800	212.995	-10.187	10.187	-1.11408	42.7547	526.33	282.459	236.568	295.785	230.545	0	0	1	2	4	0	17	0	33	0	4	22	13	47.3148	1.43378	0	0	17	0	0	11	0	5	0	0	0	1.63305	-2.39073	-0.65996	0.704151	2.39244	-2.29465	-0.56112	0.796567	2.51059
0	656580	3.25068	-135221	-917941	-250.106	-10.4133	10.4133	-1.29141	50.0447	621.28	180.055	330.563	237.447	383.833	0	0	3	5	5	0	6	0	43	4	9	27	14	82.726	1.92386	0	0	15	2	0	16	0	2	8	0	0	2.61951	-2.58909	-0.574246	0.612802	2.61889	-2.75834	-0.53808	0.675114	2.55191
0	134437066	3.74315	-145167	-1.2413e+06	133.649	-8.4213	8.4213	-0.84826	78.7162	850.932	344.66	221.551	662.23	188.702	0	0	3	4	7	0	17	0	66	0	7	38	26	103.178	1.5633	0	0	29	0	0	28	0	6	3	0	0	0.981977	-2.71022	-0.554891	0.491396	2.87023	-2.77581	-0.495793	0.603022	2.79336
0	27323	1.8461	-74891.7	-552342	33.4757	-8.68044	8.68044	-0.22072	49.3447	554.375	251.24	161.914	497.933	56.4415	0	0	1	2	2	0	12	0	42	0	2	21	19	53.528	1.27448	0	0	19	0	0	21	0	1	1	0	0	1.71234	-2.60948	-0.524546	0.590992	2.52549	-2.69951	-0.424362	0.688859	2.58043
0	137662071	3.72991	-76576.1	-521607	194.323	-8.08061	8.08061	-0.69829	45.4151	526.532	247.538	195.079	366.065	160.467	0	0	1	1	2	0	15	0	36	1	3	22	15	49.7557	1.3821	0	0	18	0	0	14	0	4	0	0	0	1.47766	-2.37215	-0.67465	0.709267	2.50887	-2.32429	-0.584188	0.807131	2.65497
0	9927432	5.20009	-91430.3	-627872	-27.0556	-8.75872	8.75872	-1.14787	48.0947	560.165	249.315	202.942	416.235	143.93	0	0	3	3	4	0	16	0	39	2	6	23	17	65.8889	1.68946	0	0	17	0	0	16	0	2	3	0	1	1.66328	-2.41858	-0.625822	0.687415	2.42526	-2.4333	-0.530167	0.767169	2.48834
0	46839102	6.11224	-98874.8	-703015	120.681	-8.66262	8.66262	-0.87256	55.5371	647.699	258.819	310.059	393.028	254.671	0	0	3	5	4	0	17	0	41	1	5	27	18	69.9181	1.70532	0	0	20	0	0	14	0	4	1	0	2	1.61601	-2.30943	-0.63654	0.645462	2.3487	-2.34174	-0.51747	0.70958	2.44129
0	25023832	6.35948	-106635	-803375	-5.8118	-8.93149	8.93149	-1.00089	57.8087	644.338	347.746	232.798	444.88	199.458	0	0	3	5	4	0	16	0	48	3	7	27	20	79.8912	1.6644	0	0	20	0	0	21	0	3	3	0	1	1.38253	-2.5014	-0.606013	0.656607	2.77949	-2.66656	-0.529953	0.742566	2.87177
0	202041	1.67924	-57402.8	-394784	42.8606	-9.08868	9.08868	0.39243	40.5955	441.422	210.316	141.585	378.582	62.8401	1	1	0	0	1	0	12	0	34	1	2	17	16	39.4869	1.16138	0	0	16	0	0	17	0	1	0	0	0	1.8195	-2.5216	-0.532223	0.593999	2.55266	-2.65677	-0.430899	0.692744	2.62497
0	46233299	2.18282	-80004.2	-524495	49.6116	-8.07078	8.07078	-0.84245	45.9739	530.523	166.968	197.661	436.53	93.9932	0	0	2	2	1	0	11	0	36	2	3	21	17	56.0271	1.55631	0	1	17	0	0	15	0	2	1	0	0	1.42104	-2.63535	-0.604644	0.667052	2.60612	-2.53591	-0.505324	0.85244	2.71126
0	70686389	0.672019	-86633.4	-546188	130.901	-8.74679	8.74679	-0.72742	43.5521	543.942	211.898	171.29	412.905	131.038	1	1	0	0	3	0	15	0	36	1	4	22	14	57.2047	1.58902	0	0	16	0	1	14	0	5	0	0	0	1.58134	-2.50992	-0.653172	0.673143	2.49127	-2.39455	-0.556856	0.784317	2.62496
0	58167984	6.46519	-160431	-1.17816e+06	-127	-8.45797	8.45797	-1.14793	64.6607	720.279	345.563	364.688	497.299	222.98	0	0	2	3	3	0	24	0	52	3	6	36	27	92.2114	1.7733	0	0	26	0	4	16	0	4	2	0	0	1.13248	-2.36378	-0.652715	0.692802	2.39412	-2.33893	-0.564136	0.805518	2.49599
0	73659204	6.923	-110071	-902107	81.8975	-8.07249	8.07249	-0.42258	60.7982	641.475	282.615	174.762	419.492	221.984	0	0	4	6	4	0	15	0	52	5	9	29	17	80.4908	1.5479	0	0	21	0	0	23	0	7	1	0	0	1.28865	-2.80103	-0.642429	0.697673	2.74742	-2.87622	-0.5465	0.751069	2.79714
0	5066025	1.03682	-99612.2	-793510	-33.3226	-8.75668	8.75668	-0.25951	64.281	700.398	212.8	176.74	653.365	47.0328	0	0	2	3	2	0	12	0	56	0	2	27	23	72.2913	1.29092	0	0	24	0	0	29	0	1	2	0	0	1.54093	-2.69111	-0.526291	0.590988	2.60183	-2.73944	-0.425897	0.688721	2.63187
0	71466525	4.38141	-193497	-1.61751e+06	-164.969	-8.88543	8.88543	-0.91471	84.3582	948.296	432.387	366.2	662.111	286.185	0	0	4	6	7	0	22	0	72	4	11	44	30	126.397	1.75552	0	0	31	0	2	28	0	4	7	0	0	1.06601	-2.5083	-0.648127	0.678505	2.84294	-2.56197	-0.55681	0.774768	2.84813
0	46838967	4.86959	-103584	-704362	122.242	-8.73857	8.73857	-0.9103	53.9567	646.566	247.887	376.876	392.33	254.235	0	0	3	5	4	0	17	0	38	1	5	27	18	70.6569	1.85939	0	0	19	1	0	11	0	4	1	0	2	1.61601	-2.27209	-0.634426	0.653301	2.34347	-2.34108	-0.51747	0.774726	2.43882
0	56676979	3.75212	-131912	-1.03338e+06	-156.201	-8.42354	8.42354	-0.82325	74.6342	844.644	240.505	151.984	656.811	187.833	0	0	3	4	4	0	12	0	66	1	5	33	25	92.4734	1.40111	0	0	27	0	0	33	0	1	5	0	0	1.33106	-2.70526	-0.613407	0.571056	2.64539	-2.5425	-0.548443	0.644676	2.81007
0	44415997	2.20603	-85143.4	-609291	107.126	-8.60782	8.60782	-0.37878	49.8559	572.38	279.09	115.229	406.989	165.391	0	0	3	4	5	0	15	0	43	4	9	23	15	61.8942	1.4394	0	0	17	0	0	20	0	6	0	0	0	1.30729	-2.79819	-0.572652	0.635294	2.74552	-2.83471	-0.558738	0.700598	2.78756
0	71454876	3.67586	-173826	-1.4604e+06	-196.514	-8.39011	8.39011	-0.82137	84.165	929.841	330.457	284.35	578.128	351.713	0	0	3	5	7	0	12	0	75	7	14	41	23	124.42	1.65894	0	0	28	0	0	34	0	6	7	0	0	1.11607	-2.73044	-0.603502	0.642577	2.66829	-2.86362	-0.51357	0.660792	2.5857
0	10831740	4.21032	-114121	-732190	-115.362	-8.96452	8.96452	-0.35933	45.9255	611.919	345.558	229.887	173.782	438.137	0	0	3	5	6	0	6	0	42	8	14	25	8	77.6236	1.84818	0	0	13	0	0	17	0	7	5	0	0	2.37645	-2.48424	-0.570694	0.600878	2.56193	-2.80382	-0.536748	0.665665	2.37871
0	44383697	8.72623	-142423	-1055762	-96.4414	-9.34728	9.34728	-0.54692	62.0086	773.826	272.624	237.826	314.764	459.062	0	0	3	5	8	0	5	0	57	6	14	31	12	106.754	1.87287	0	0	16	0	0	26	0	8	6	0	1	1.70877	-2.63157	-0.518576	0.531904	2.66799	-2.82189	-0.476267	0.51624	2.71299
0	1348	4.41681	-86369.7	-594778	132.522	-8.40059	8.40059	-1.00315	50.0151	581.576	266.557	303.735	535.561	46.0146	0	0	2	2	2	0	22	0	38	1	3	24	20	54.9248	1.44539	0	0	20	1	0	14	0	3	0	0	0	1.40682	-2.27509	-0.659352	0.694839	2.23819	-2.16802	-0.523601	0.814264	2.43228
0	46842171	2.11379	-123381	-968263	30.1189	-8.35228	8.35228	-0.81423	67.1006	760.879	290.427	211.663	500.922	259.957	0	0	3	4	5	0	16	0	57	3	8	31	23	92.6117	1.62477	0	0	23	1	0	26	0	5	2	0	0	1.63397	-2.61928	-0.602628	0.57965	2.50591	-2.72763	-0.420266	0.662837	2.52717
0	8055573	2.09508	-76014.9	-523473	134.172	-8.53352	8.53352	-0.84286	46.5483	536.736	267.034	265.145	495.142	41.594	0	0	2	2	2	0	21	0	35	1	3	22	17	51.6057	1.47445	0	0	18	0	0	13	0	3	0	0	1	1.43495	-2.27419	-0.637503	0.684891	2.22157	-2.16841	-0.525045	0.794577	2.40826
0	88930915	7.72271	-110109	-801175	-76.0442	-9.13336	9.13336	-0.79493	55.5057	611.102	172.268	235.749	484.381	126.721	0	0	3	4	4	0	12	0	47	3	7	26	19	81.3615	1.7311	0	0	19	0	1	21	0	2	3	0	1	1.68592	-2.63938	-0.606293	0.647628	2.6696	-2.57456	-0.53808	0.791624	2.74176
0	1204882	0.988883	-102712	-723087	-7.3247	-8.34974	8.34974	-0.43635	52.2727	603.218	203.684	284.615	509.822	93.3967	0	0	2	2	2	0	15	0	41	2	4	25	20	68.949	1.68168	0	0	19	2	0	16	0	2	2	0	0	1.57569	-2.60264	-0.583972	0.614677	2.62477	-2.74339	-0.454009	0.801636	2.60652
0	5531	6.34404	-58075.9	-357677	120.695	-8.72872	8.72872	-0.35807	33.1019	423.924	131.219	50.7982	309.739	114.185	1	1	0	0	3	0	5	0	30	0	3	15	6	43.7744	1.45915	0	0	10	0	0	15	0	5	0	0	0	2.08304	-2.59391	-0.254191	0.225284	2.50912	-2.6288	-0.264699	0.173978	2.50974
0	2930929	6.7012	-112808	-828405	11.5753	-9.00447	9.00447	-1.25007	59.8015	680.948	296.94	319.446	495.897	185.051	0	0	3	5	4	0	21	0	46	2	6	29	21	80.8485	1.75758	0	0	21	0	0	17	0	3	3	0	2	1.37061	-2.33374	-0.622513	0.7212	2.36208	-2.57225	-0.53808	0.805915	2.44617
0	698956	4.69719	-97233.4	-684170	135.383	-8.93183	8.93183	-1.13232	50.5391	586.422	277.753	297.8	462.627	123.795	0	0	2	3	2	0	22	0	40	1	3	26	19	63.1356	1.57839	0	0	20	0	0	14	0	4	2	0	0	1.4163	-2.26793	-0.647923	0.674449	2.2626	-2.17466	-0.53808	0.786374	2.42089
0	5472495	5.40732	-109634	-754469	-115.946	-9.13343	9.13343	-1.21251	53.2005	599.005	225.95	247.845	442.841	156.165	0	0	3	4	4	0	12	0	43	2	6	26	20	69.404	1.61405	0	0	20	0	1	17	0	0	4	0	1	1.64106	-2.41954	-0.626187	0.604226	2.44705	-2.43431	-0.51303	0.805915	2.59718
0	10851835	5.07559	-82576.8	-554143	29.1942	-8.83609	8.83609	-1.40949	44.2059	527.379	180.383	161.63	422.441	104.938	0	0	2	3	4	0	6	0	36	1	5	21	12	62.1557	1.72655	0	0	15	0	0	15	0	3	2	0	1	1.65463	-2.50062	-0.547888	0.642142	2.46409	-2.46896	-0.456152	0.722026	2.54072
0	11024165	0.982807	-99858.5	-686668	34.526	-8.35624	8.35624	-0.4976	50.8965	609.03	248.504	233.604	540.307	68.723	0	0	2	3	2	0	20	0	42	0	2	25	19	66.5519	1.58457	0	0	20	0	1	17	0	2	2	0	0	1.41923	-2.32945	-0.61637	0.620237	2.35134	-2.26279	-0.452366	0.790595	2.47724
0	987189	2.34948	-93934.2	-680273	12.3544	-8.35777	8.35777	-0.11782	51.6295	578.517	233.453	240.461	471.191	107.325	0	0	2	2	2	0	15	0	41	2	4	24	19	65.4621	1.59664	0	1	19	0	0	17	0	2	2	0	0	1.58549	-2.60324	-0.573765	0.620791	2.62432	-2.74348	-0.460462	0.722841	2.60525
0	21212519	4.17939	-103225	-703967	38.8167	-8.73502	8.73502	-1.39626	55.1347	654.09	235.984	257.821	471.015	183.076	0	0	3	4	4	0	16	0	43	2	6	27	17	70.3358	1.63572	0	0	21	0	0	16	0	2	3	0	1	1.21541	-2.63952	-0.632076	0.700833	2.59666	-2.52693	-0.51265	0.805915	2.72263
0	1271431	1.4317	-110636	-779072	-56.2052	-8.56151	8.56151	-1.45385	55.9367	634.468	229.65	247.713	456.481	177.987	0	0	3	3	4	0	16	0	44	3	7	28	17	73.9763	1.68128	0	0	21	0	0	16	0	2	4	0	1	1.16443	-2.64111	-0.632791	0.680501	2.60177	-2.54156	-0.529571	0.818332	2.72409
0	10024867	0.883622	-119002	-958034	-71.2076	-8.86008	8.86008	-0.57849	66.7378	717.265	273.005	216.803	631.22	86.0452	0	0	3	4	4	0	18	0	56	1	5	31	24	78.904	1.409	0	0	26	0	0	25	0	1	4	0	0	1.33254	-2.49677	-0.626913	0.665089	2.72971	-2.49923	-0.526598	0.737007	2.82583
0	71666278	5.30162	-106674	-832201	76.6264	-8.94415	8.94415	-0.91924	60.1047	655.587	233.66	210.336	474.882	180.705	0	0	3	4	4	0	16	0	49	1	5	28	22	76.7746	1.56683	0	0	22	1	0	21	0	4	1	0	0	1.43122	-2.65415	-0.57326	0.502448	2.57764	-2.67547	-0.399834	0.661563	2.61622
0	66548633	4.78554	-101196	-743567	-43.1471	-8.63109	8.63109	-0.33952	53.5637	580.863	198.879	181.719	480.738	100.125	0	0	2	3	3	0	12	0	46	2	5	25	19	71.4066	1.55232	0	0	20	0	1	21	0	2	2	0	0	1.72358	-2.63893	-0.604366	0.637933	2.6711	-2.5747	-0.50877	0.682732	2.7411
0	2753	6.28455	-99028.8	-709039	-93.447	-8.60797	8.60797	-0.67887	57.1426	642.557	174.346	138.051	522.3	120.257	0	0	2	3	3	0	6	0	51	1	4	25	18	73.8888	1.4488	0	0	20	0	0	26	0	2	3	0	0	1.29387	-2.80188	-0.551835	0.505358	2.74247	-2.76623	-0.499332	0.576623	2.84157
0	10108060	2.48102	-76574.4	-531190	182.401	-8.82996	8.82996	-0.98201	45.4151	532.5	286.33	235.585	456.912	75.5874	0	0	1	1	2	0	21	0	36	1	3	22	16	49.7557	1.3821	0	0	18	0	0	14	0	4	0	0	0	1.44012	-2.26294	-0.67272	0.667683	2.22426	-2.27953	-0.573024	0.761954	2.37492
0	10021158	3.32055	-100828	-722017	155.742	-8.84861	8.84861	-1.27866	53.6327	627.536	284.813	307.55	495.813	131.723	0	0	2	3	2	0	22	0	43	1	3	27	20	67.0907	1.56025	0	0	21	0	0	16	0	4	2	0	0	1.35243	-2.38705	-0.629828	0.649158	2.35125	-2.32417	-0.53808	0.745379	2.47578
0	675227	2.95948	-80021.9	-602992	72.6131	-8.5912	8.5912	-0.61311	52.5027	572.125	194.413	162.964	533.871	38.2538	0	0	2	3	2	0	16	0	44	1	3	23	18	56.7829	1.29052	0	0	20	0	0	21	0	3	0	0	0	1.42662	-2.78543	-0.618456	0.669379	2.72532	-2.71915	-0.517765	0.771	2.83722
0	16722832	3.9711	-140496	-1.23255e+06	62.8538	-7.95737	7.95737	-0.50766	81.3018	851.899	282.985	180.283	686.894	165.005	0	0	3	5	5	0	18	0	71	3	8	36	24	113.244	1.59499	0	0	26	0	0	35	0	7	2	0	1	1.22397	-2.7473	-0.504346	0.509535	2.64137	-2.86968	-0.444172	0.618051	2.61896
0	121237857	5.93268	-150488	-1.36344e+06	83.4936	-8.83104	8.83104	-0.11375	89.8045	950.831	271.798	185.12	788.69	162.141	0	0	3	4	6	0	20	0	80	0	6	39	29	116.15	1.45188	0	0	31	0	0	41	0	5	3	0	0	1.11483	-2.7216	-0.390677	0.40533	2.64283	-2.82328	-0.330745	0.469846	2.57264
0	130252505	7.04689	-125657	-1.04703e+06	7.35177	-8.09757	8.09757	-0.37854	66.1358	703.358	313.781	225.532	488.083	215.275	0	0	2	4	4	0	6	0	56	2	6	31	21	92.3187	1.64855	0	0	23	1	0	25	0	4	3	0	0	1.65103	-2.48049	-0.569781	0.650442	2.75437	-2.51378	-0.481013	0.709045	2.86302
0	136242352	2.98854	-84083.3	-571816	-29.0359	-8.54841	8.54841	-0.84712	47.2927	528.633	172.371	176.15	406.887	121.746	0	0	2	2	3	0	11	0	38	2	5	22	16	61.9344	1.62985	0	0	17	0	0	16	0	2	2	0	1	1.43665	-2.60389	-0.69326	0.680812	2.61988	-2.49609	-0.571342	0.814516	2.75454
0	117841263	7.89588	-107377	-831723	48.2956	-8.6951	8.6951	-0.45578	57.0951	619.78	250.615	211.549	502.421	117.359	0	0	2	2	2	0	17	0	47	2	4	28	20	72.7378	1.54761	0	0	22	0	0	19	0	3	3	0	0	1.3649	-2.43122	-0.563419	0.59326	2.53621	-2.37387	-0.460408	0.708677	2.59697
0	11418411	4.21422	-126585	-998152	-203.754	-8.68142	8.68142	-1.42178	60.7634	657.09	246.214	210.088	463.992	193.098	0	0	3	5	6	0	12	0	52	3	9	30	20	74.622	1.43504	0	0	23	0	0	22	0	0	7	0	0	1.57424	-2.68619	-0.559329	0.569169	2.67732	-2.64541	-0.460972	0.65975	2.73742
0	90388367	3.46325	-89983.7	-623216	97.4831	-8.42096	8.42096	-0.68661	47.3039	545.232	220.584	160.993	410.806	134.426	0	0	3	3	4	0	18	0	38	3	7	23	17	63.331	1.66661	0	0	17	1	0	15	0	4	1	0	0	1.55247	-2.28834	-0.479494	0.516067	2.34043	-2.24645	-0.36792	0.668677	2.50658
0	118437921	3.22216	-139650	-1.22156e+06	-143.176	-8.66898	8.66898	-0.75446	72.867	743.161	134.465	206.559	668.374	74.7873	0	0	3	4	4	0	11	0	62	1	5	33	22	104.63	1.68758	0	0	24	1	0	29	0	2	5	0	1	1.71721	-2.6167	-0.499069	0.374883	2.74016	-2.71487	-0.338468	0.5378	2.64148
0	145866535	19.1777	-129978	-1121385	148.823	-10.9174	10.9174	-5.74029	67.8582	710.853	268.922	118.034	459.939	250.914	0	0	2	3	5	0	6	2	60	0	5	32	20	96.1559	1.6026	0	0	23	0	0	28	0	5	4	0	0	1.34674	-2.72421	-0.425727	0.506823	2.65344	-3.05869	-0.463823	0.515263	2.58038
0	44344397	3.24358	-219812	-2.23785e+06	-577.038	-8.50283	8.50283	-0.56373	92.1678	862.204	317.789	298.174	469.822	392.382	0	0	3	5	16	0	15	0	82	11	27	47	27	135.984	1.65834	0	0	30	0	0	35	0	1	15	0	1	1.39302	-2.67697	-0.608134	0.678102	2.78023	-2.89586	-0.623747	0.570006	2.63196
0	137655523	6.80618	-110374	-701380	-106.281	-9.28615	9.28615	-1.05145	50.9351	641.153	240.088	343.603	479.775	161.378	0	0	1	2	3	0	12	0	40	1	4	26	17	67.2539	1.68135	0	1	19	0	0	14	0	1	5	0	0	1.37196	-2.39775	-0.645064	0.701142	2.42401	-2.58992	-0.53808	0.780156	2.41773
0	54759170	2.83946	-64976.5	-402131	67.2468	-8.19493	8.19493	-0.45783	37.4035	456.794	223.314	178.585	397.044	59.7506	0	0	1	1	2	0	11	0	30	0	2	18	14	43.5838	1.45279	0	0	15	0	0	12	0	2	1	0	0	1.74443	-2.26234	-0.55793	0.621392	2.33715	-2.21989	-0.457229	0.713034	2.44245
0	137640120	3.29465	-87678.6	-616139	-37.5897	-8.48155	8.48155	-0.81377	50.3863	563.599	150.251	146.211	457.076	106.523	0	0	2	2	3	0	11	0	41	2	5	23	17	65.5423	1.59859	0	0	18	0	0	18	0	2	2	0	1	1.45741	-2.64115	-0.498719	0.560939	2.60161	-2.54249	-0.41861	0.55369	2.72412
0	11201422	3.77624	-127787	-1.16695e+06	-303.347	-10.1474	10.1474	-0.04164	79.1089	730.098	86.3178	88.6405	576.143	153.955	0	0	2	3	3	0	0	0	75	1	4	31	24	93.1253	1.24167	0	0	26	0	0	44	0	0	5	0	0	1.74263	-2.74958	-0.550682	0.54605	2.71998	-2.70884	-0.486742	0.498778	2.85355
0	78325043	4.23291	-95258.2	-805020	-11.291	-8.43577	8.43577	0.27658	60.8254	587.997	183.219	121.63	471.004	116.994	0	0	2	3	1	0	11	0	53	3	4	26	21	72.3354	1.36482	0	0	22	0	0	27	0	3	1	0	0	1.27372	-3.00008	-0.556945	0.609939	2.9431	-2.93905	-0.468799	0.701996	3.02541
0	3900479	5.37506	-113048	-703753	-272.703	-9.04301	9.04301	-0.99254	38.6205	481.049	177.651	185.307	276.93	204.119	0	0	2	2	4	0	10	0	34	2	6	22	16	63.8963	1.8793	0	0	14	0	3	12	0	1	4	0	0	2.36321	-2.38398	-0.502484	0.583957	2.64515	-2.46965	-0.411626	0.574815	2.56983
0	53389118	6.4592	-212419	-2.09805e+06	-94.7305	-8.82677	8.82677	-0.76053	99.077	1023.2	404.25	373.903	750.43	272.768	0	0	3	5	7	0	23	0	83	2	9	49	33	154.67	1.86349	0	0	33	0	2	34	0	6	6	0	2	1.42159	-2.67731	-0.533926	0.589129	2.59505	-2.77446	-0.41712	0.718383	2.59651
0	102594412	3.97183	-126154	-979044	-20.3845	-9.05685	9.05685	-0.99414	61.6903	678.257	228.881	326.254	459.89	218.367	0	0	3	4	4	0	12	0	48	1	5	30	20	91.8261	1.91304	0	0	20	1	0	18	0	3	4	0	2	1.48338	-2.52995	-0.571333	0.5935	2.64489	-2.75193	-0.491219	0.691632	2.59039
0	11526254	6.70113	-137701	-1.21294e+06	83.7515	-8.11702	8.11702	-0.82395	79.9614	841.68	261.936	212.289	700.648	141.032	0	0	3	4	7	0	21	0	68	2	9	36	25	108.056	1.58905	0	0	27	0	0	32	0	6	2	0	1	1.09594	-2.74611	-0.492574	0.532595	2.65424	-2.85514	-0.394538	0.623832	2.67992
0	9979079	3.68492	-109762	-910054	20.586	-8.19935	8.19935	-0.13479	73.6194	799.116	321.465	213.134	704.896	94.2191	0	0	2	3	2	0	21	0	63	3	5	31	28	79.9627	1.26925	0	0	28	0	0	32	0	2	1	0	0	1.18245	-2.65332	-0.624811	0.666977	2.57818	-2.73637	-0.540712	0.72766	2.64188
0	25194092	7.33039	-132629	-1.1491e+06	134.157	-8.13609	8.13609	-0.35132	79.5858	842.251	340	257.613	648.068	194.184	0	0	4	5	5	0	21	0	66	4	9	36	26	101.608	1.53951	0	0	28	0	0	30	0	6	1	0	1	0.954434	-2.75938	-0.519404	0.591954	2.66583	-2.88977	-0.428969	0.727671	2.56408
0	44402571	2.08397	-99032	-769844	72.9054	-8.01049	8.01049	-0.25428	62.3918	692.612	286.669	206.302	579.284	113.328	0	0	2	3	2	0	15	0	52	1	3	27	21	77.4641	1.48969	0	0	22	0	0	25	0	3	1	0	1	1.32642	-2.53313	-0.529523	0.568362	2.7704	-2.39251	-0.428739	0.689975	2.84167
[truncated: 306 more columns]
